# Supplementary material
Source: PubMed Central journal article supplement (PMC2937624)
Supplement: supp_84_18_9105__1.pdf [file supp_84_18_9105__1.pdf]

# High Variability and Rapid Evolution of a Nanovirus

Ioana Grigoras, Tatiana Timchenko, Ana Grande-Pérez, Lina Katul, Heinrich-Josef Vetten and Bruno Gronenborn

## Supplementary information:

Figures: 2

Tables: 5

Sequences as text files in fasta format.

The following mutations were introduced for cloning purposes or overlap the primer sequences. The C51T change in DNA-R had occurred in the agrobacterium plasmid used to establish the ISV-T1 population. These sequence changes were not taken into account for the analyses:

| Genome component | FBNSV-[ET:Hol] isolate | Clone no.           | Mutation | Reason                                |
|------------------|------------------------|---------------------|----------|---------------------------------------|
| DNA-R            | 1997                   | PCR.EcoRI.108-      | G535T    | Overlaps the primer Hol-R-EcoRI-dir   |
| DNA-R            | ISV-T1                 | All clones          | C51T     | Present in pBin19 DNA-R dim plasmid   |
| DNA-U4           | JKI-2000               | All PCR.XbaI clones | C480T    | XbaI site created for cloning reasons |
| DNA-U4           | JKI-2000               | PCR.XbaI.33+        | T460G    | Overlaps the primer Hol-U4-XbaI-rev   |

### Supplementary Figure S1. Compilation of all cloned and sequenced FBNSV DNAs.

Genome components are shown in a linear fashion as scaled line drawings with ORF sequences represented as grey bars. Members of the three populations FBNSV-[ET:Hol;1997], FBNSV-[ET:Hol;JKI-2000] and FBNSV-[ET:Hol;ISV-T1] are framed. FBNSV-[ET:Hol;JKI-1998/99] and FBNSV-[ET:Hol;IPO-1998/99] consensus sequences are also framed. FBNSV-[ET:Hol;IPO-1998/99] refers to two sequences published by Franz *et al.*, (28). The first line within each frame represents the respective consensus sequence. Clone designations contain, from left to right, information about the respective amplification method (RCA or PCR), the restriction endonuclease site used for cloning, the clone number, and the relative orientation of the insert; (+): viral strand and *lac* promoter of the plasmid have same polarity, (-): viral strand and *lac* promoter of the plasmid have opposite polarity. Framed names indicate the clones of the FBNSV-[ET:Hol;JKI-2000] population that served to establish the FBNSV-[ET:Hol;ISV-T1] population. Base changes are indicated by bi-coloured vertical lines: the upper part of the vertical line denotes the nucleotide present in the FBNSV-[ET:Hol;1997] consensus sequence and the bottom part the allele. Nucleotides are colour-coded as in Applied Biosystems BigDye terminator sequencing; A: green; T: red; C: blue; G: black. Mutations that were completely fixed in the FBNSV-[ET:Hol;JKI-2000] population are shown in bold italics, mutations found in the majority of cases (> 50% and < 100%) are shown in bold. Deletions ( $\Delta$ ) or recombinant sequences are represented by blank or magenta sections of the scaled lines, respectively. Insertions are marked by a +. Altered ORF sequences due to frameshifts are shown as tawny bars. A summary of all sequence alterations within each population is shown below the individual clones (“all mutations”). In case of the FBNSV-[ET:Hol;JKI-2000] population, mutations clearly identified by directly sequencing of RCA products are shown below the “all mutations” line, and the relative proportion of the respective alleles is indicated by proportionally coloured bars.

### FBNSV-[ET:HoI;1997] DNA-R

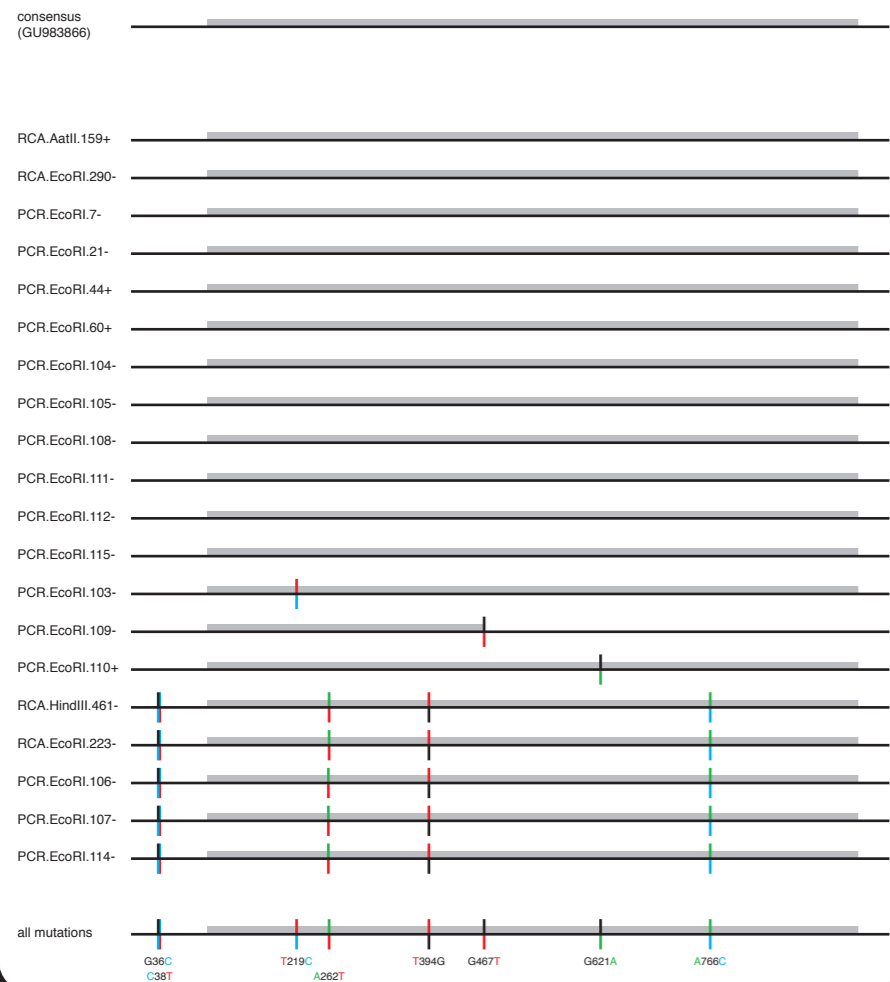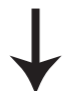

### FBNSV-[ET:HoI;JKI-1998/99] DNA-R

AJ749894

### FBNSV-[ET:HoI;JKI-2000] DNA-R

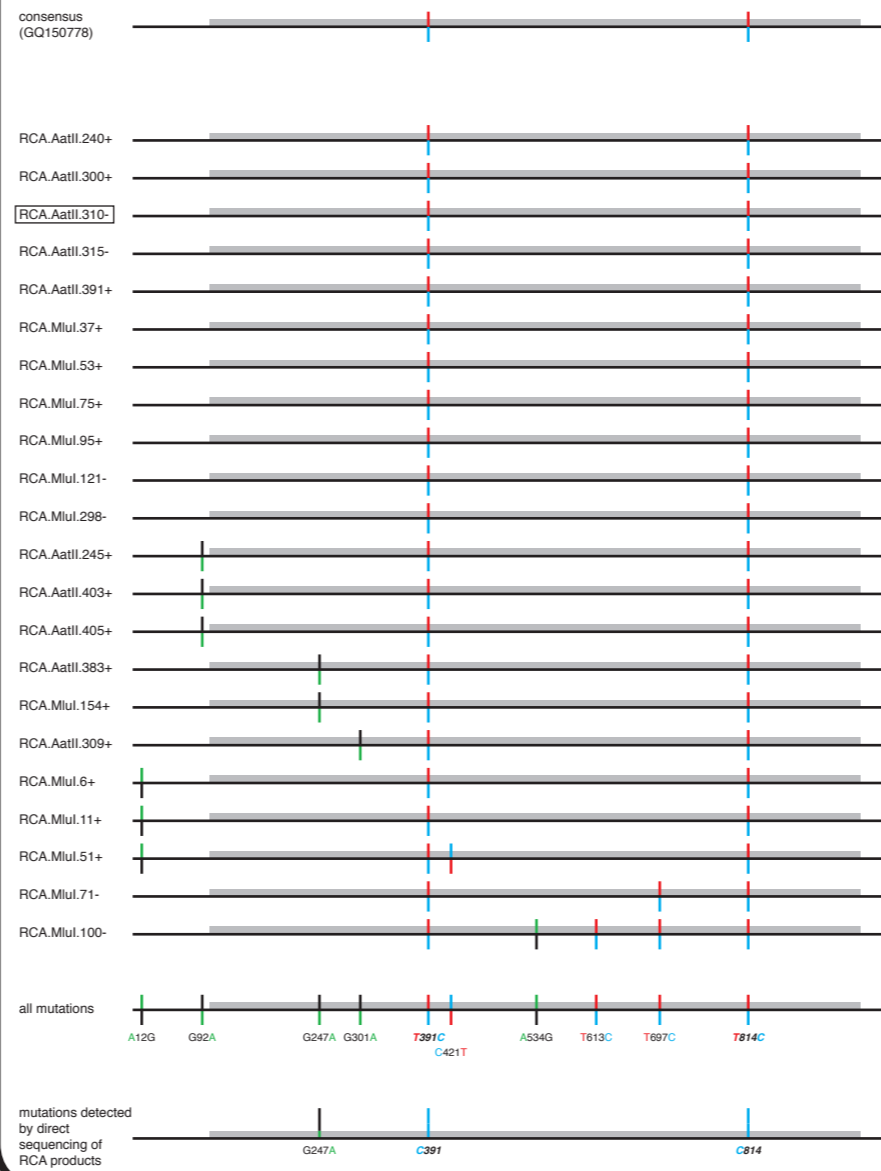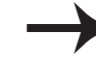

### FBNSV-[ET:HoI;ISV-T1] DNA-R

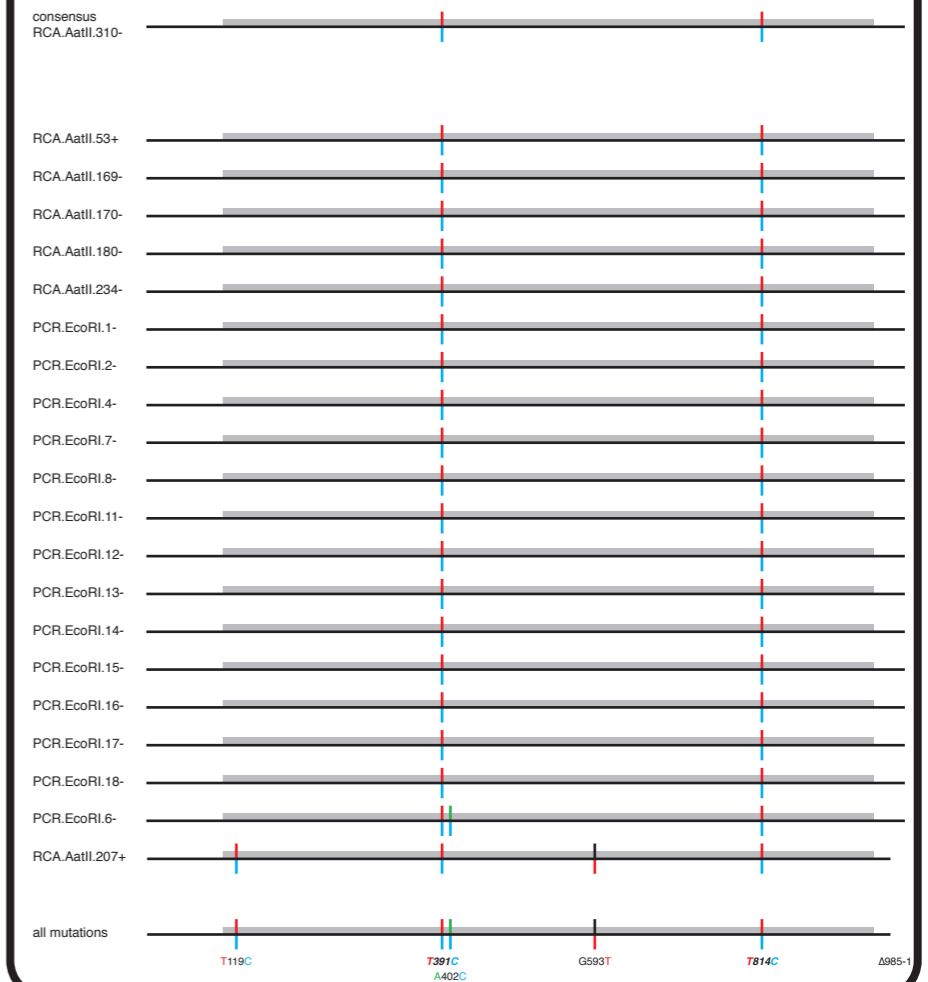

Figure S1 A

### FBNSV-[ET:Hol;1997] DNA-S

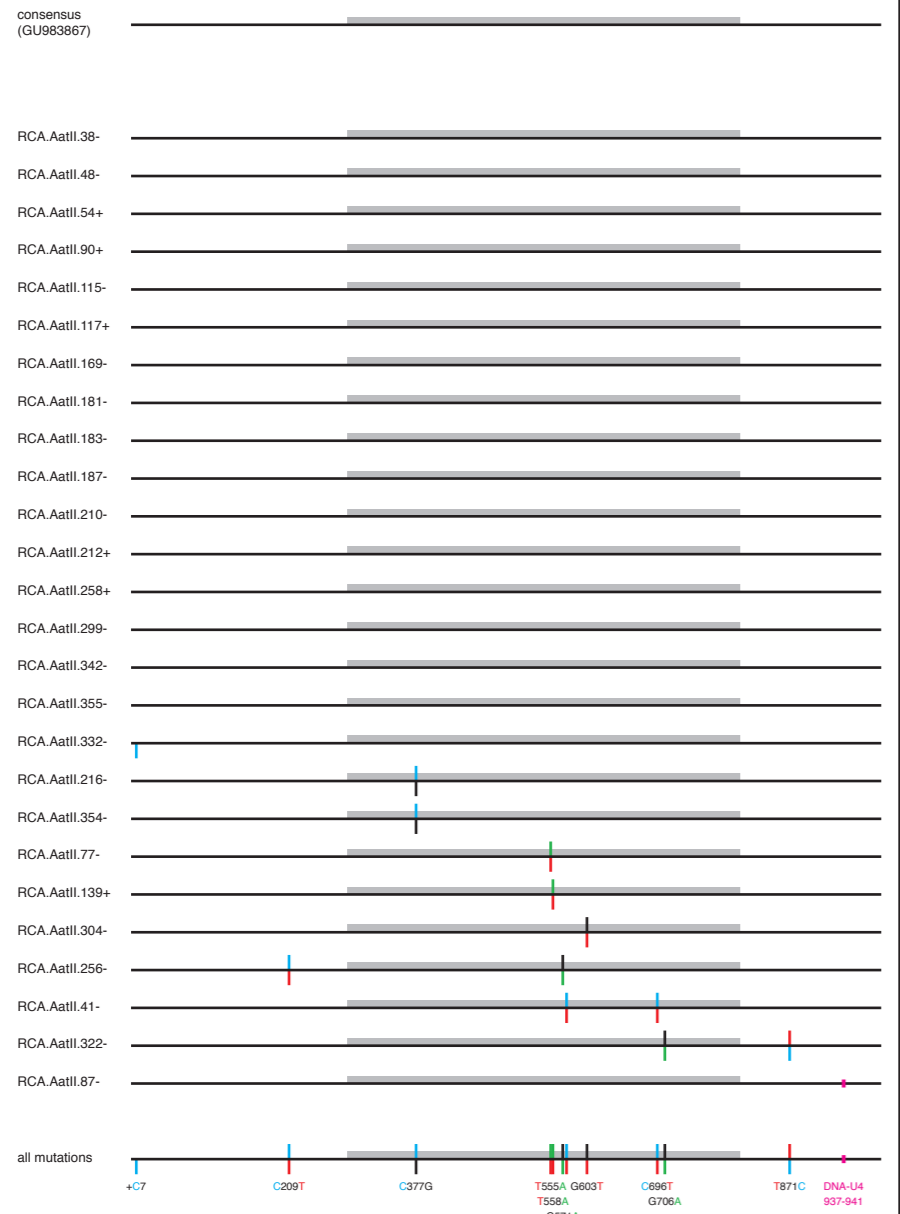

### FBNSV-[ET:Hol;JKI-2000] DNA-S

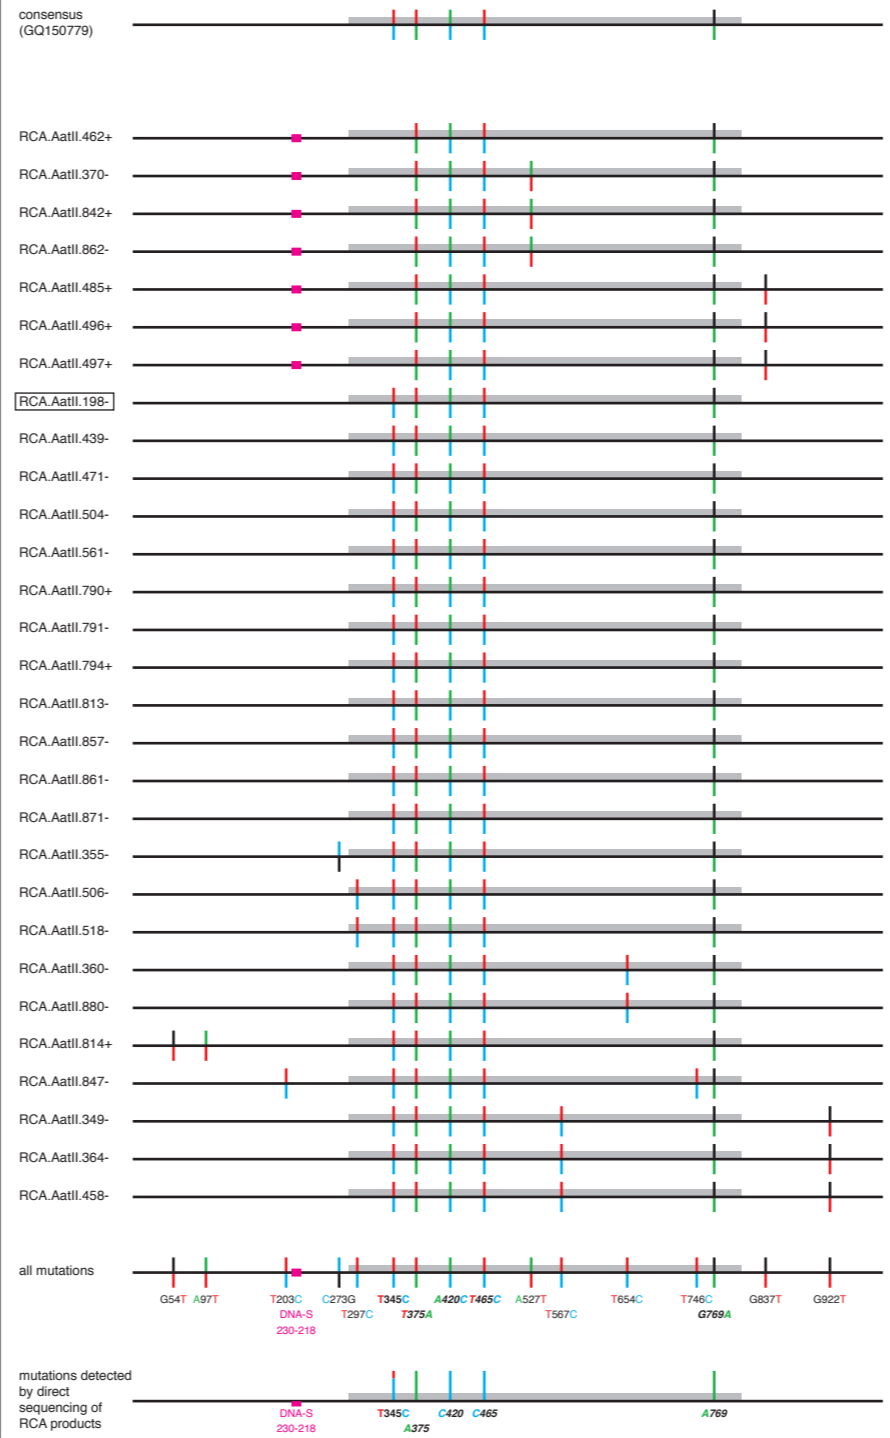

### FBNSV-[ET:Hol;ISV-T1] DNA-S

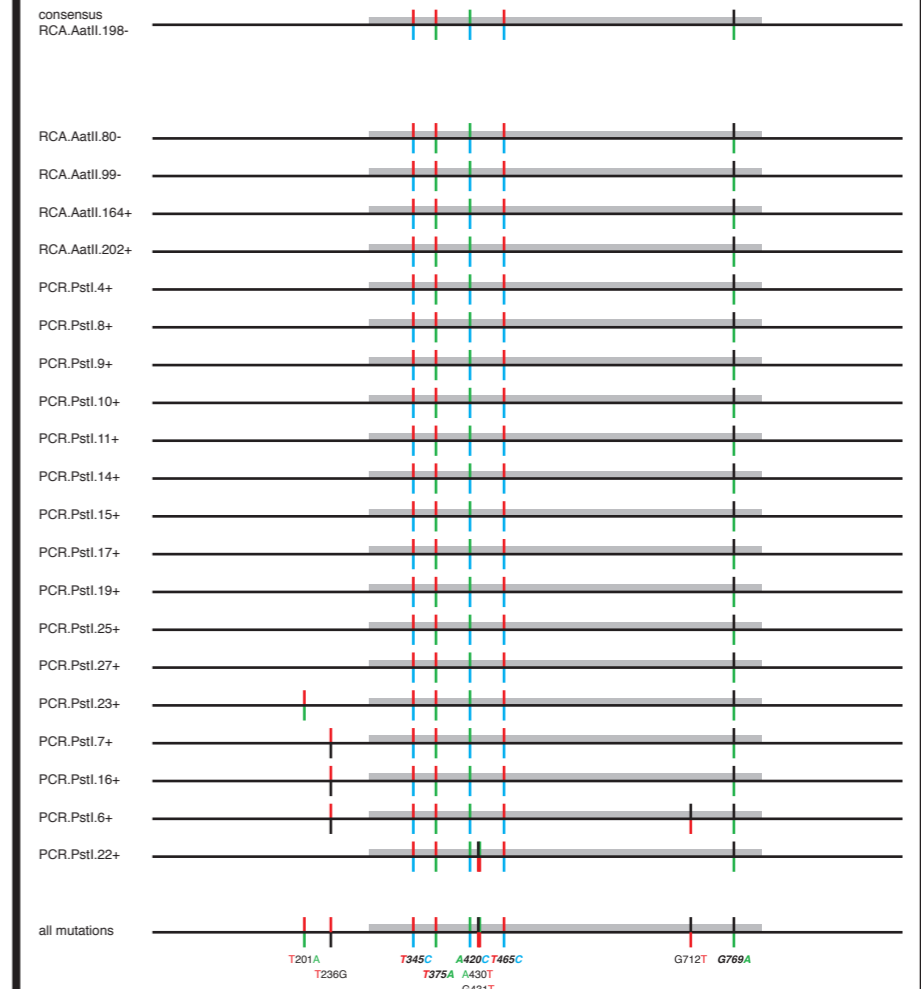

### FBNSV-[ET:Hol;JKI-1998/99] DNA-S

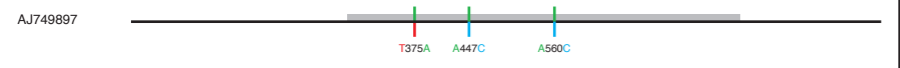

Figure S1 B

### FBNSV-[ET:HoI;1997] DNA-C

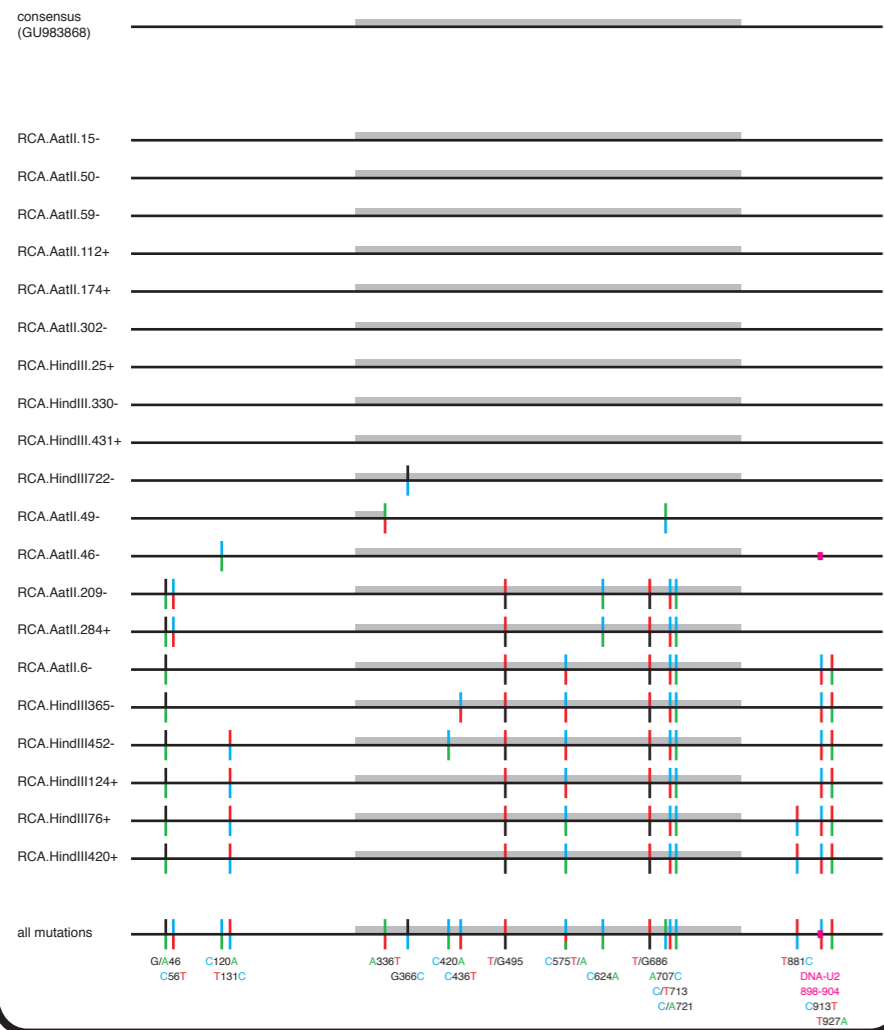

### FBNSV-[ET:HoI;JKI-2000] DNA-C

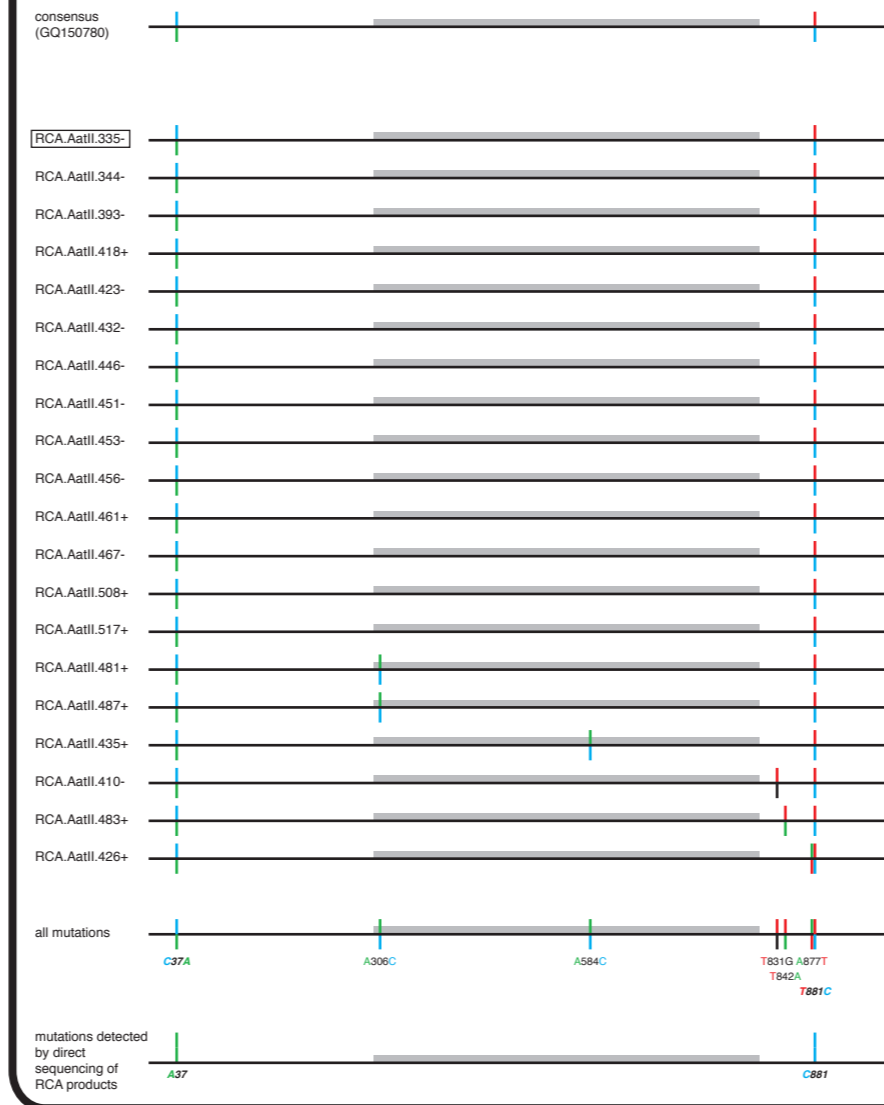

### FBNSV-[ET:HoI;ISV-T1] DNA-C

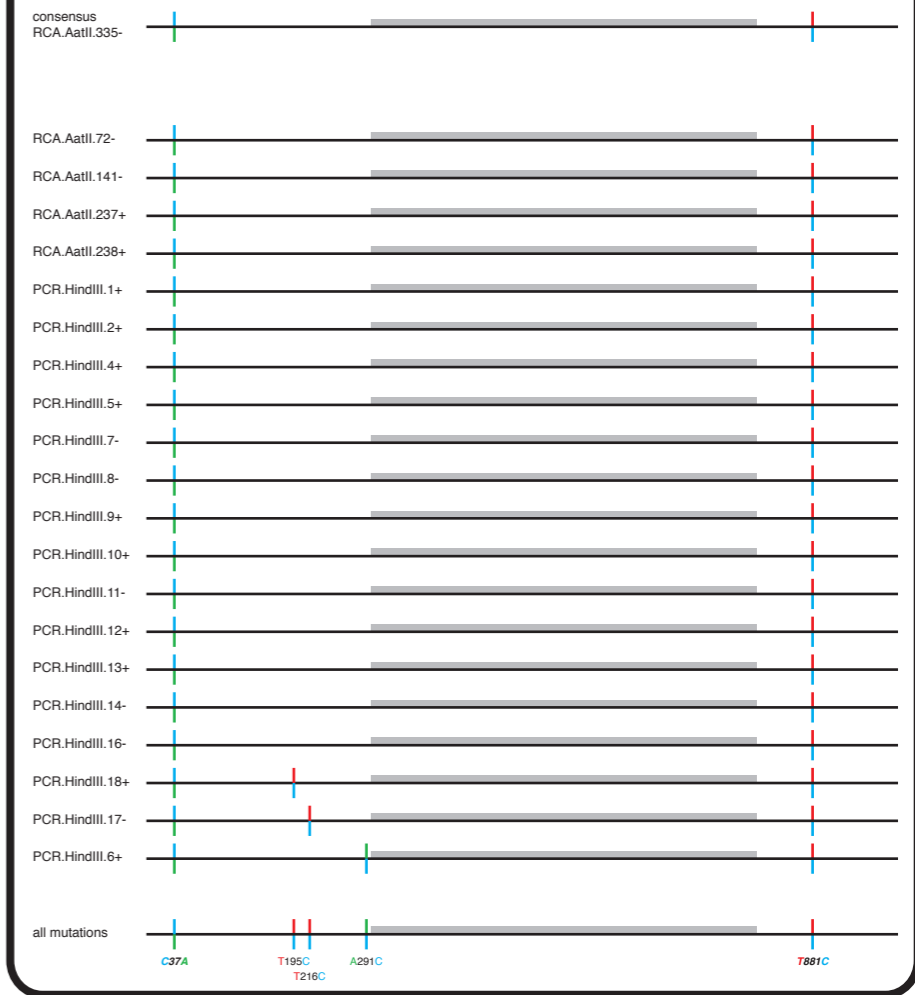

### FBNSV-[ET:HoI;JKI-1998/99] DNA-C

AJ749900

### FBNSV-[ET:Hol;1997] DNA-M

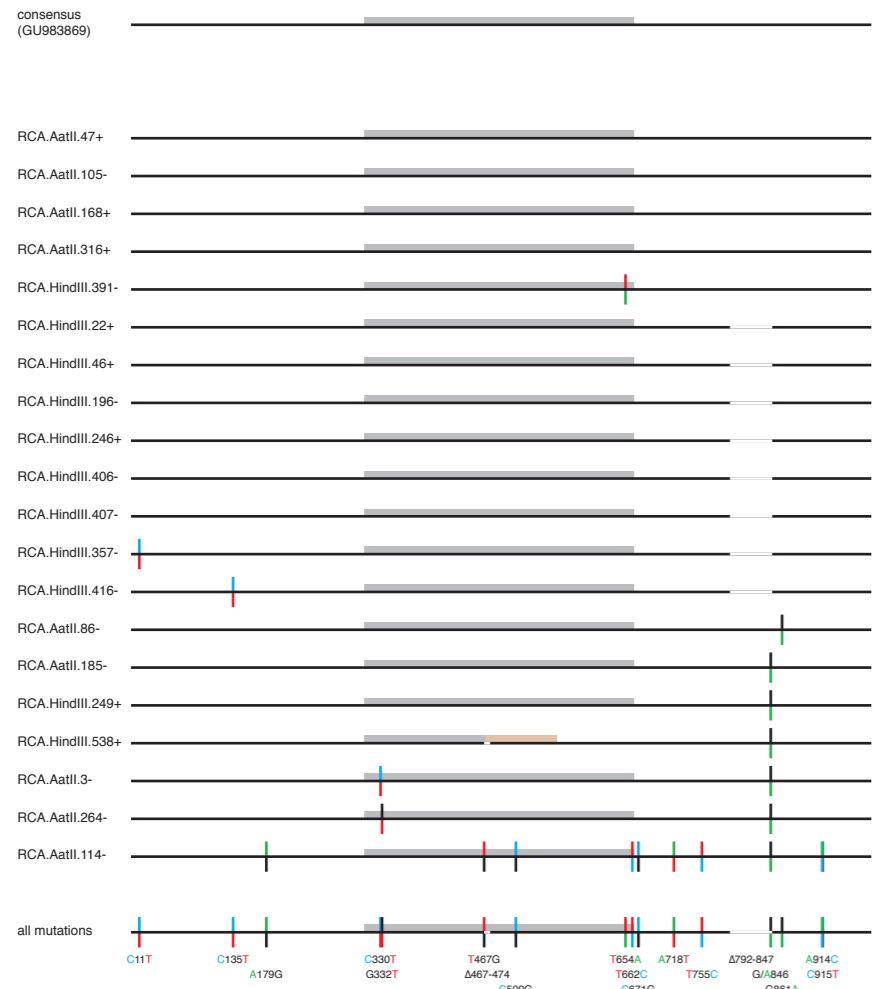

### FBNSV-[ET:Hol;JKI-2000] DNA-M

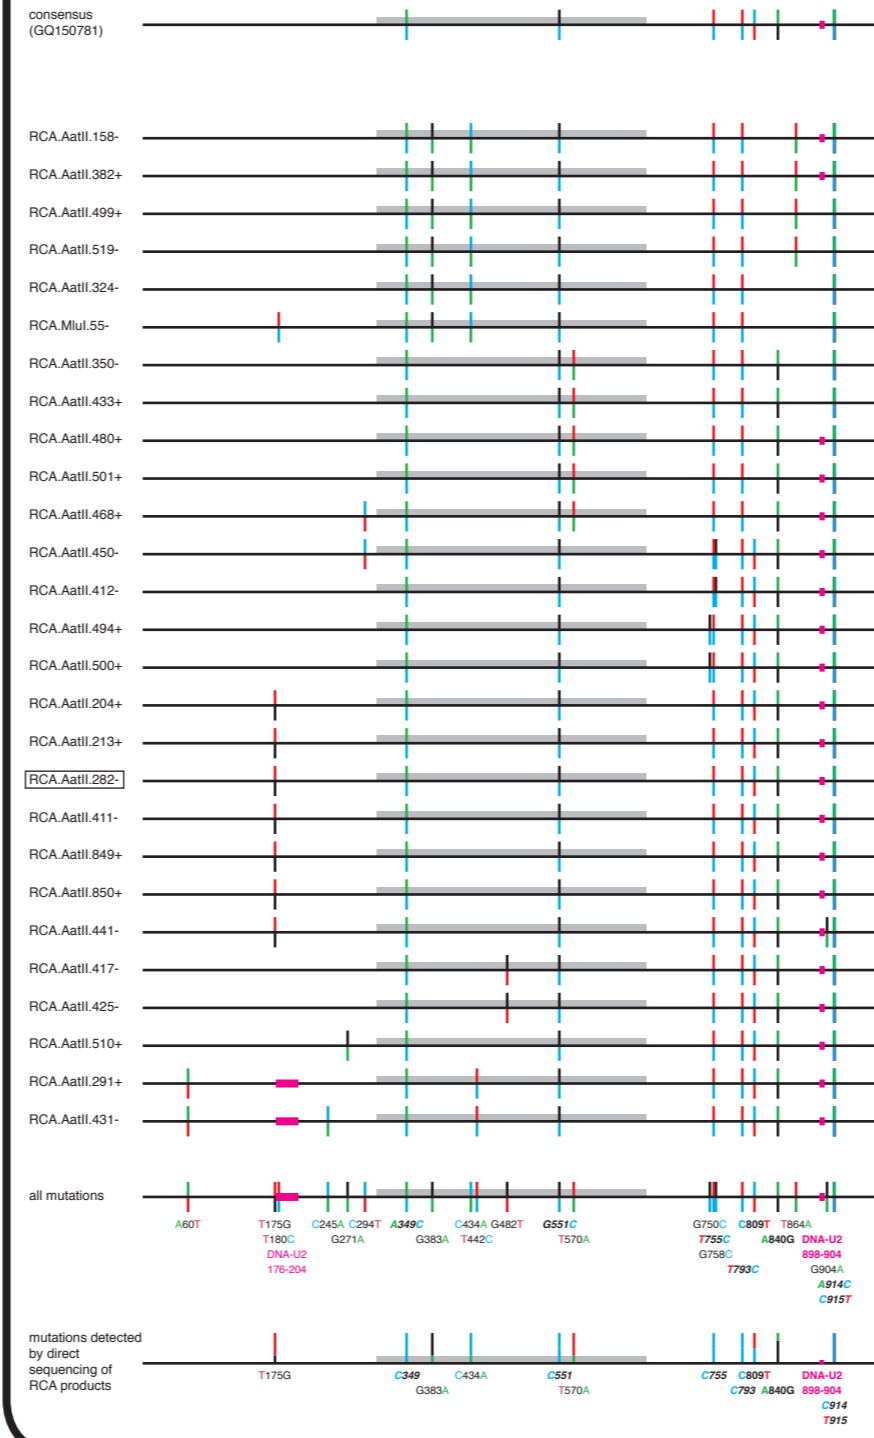

### FBNSV-[ET:Hol;ISV-T1] DNA-M

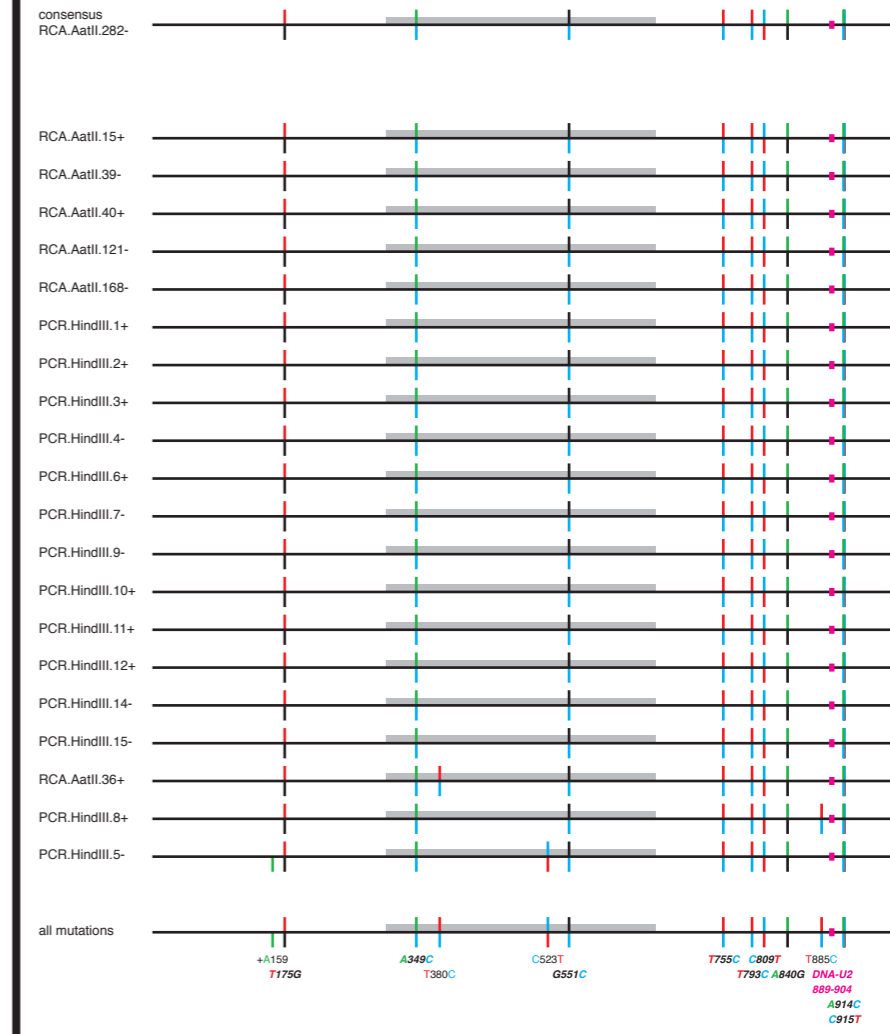

### FBNSV-[ET:Hol;JKI-1998/99] DNA-M

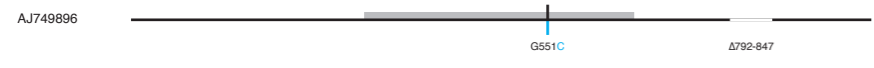

### FBNSV-[ET:Hol;IPO-1998/99] DNA-M

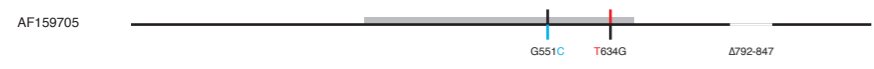

Figure S1 D

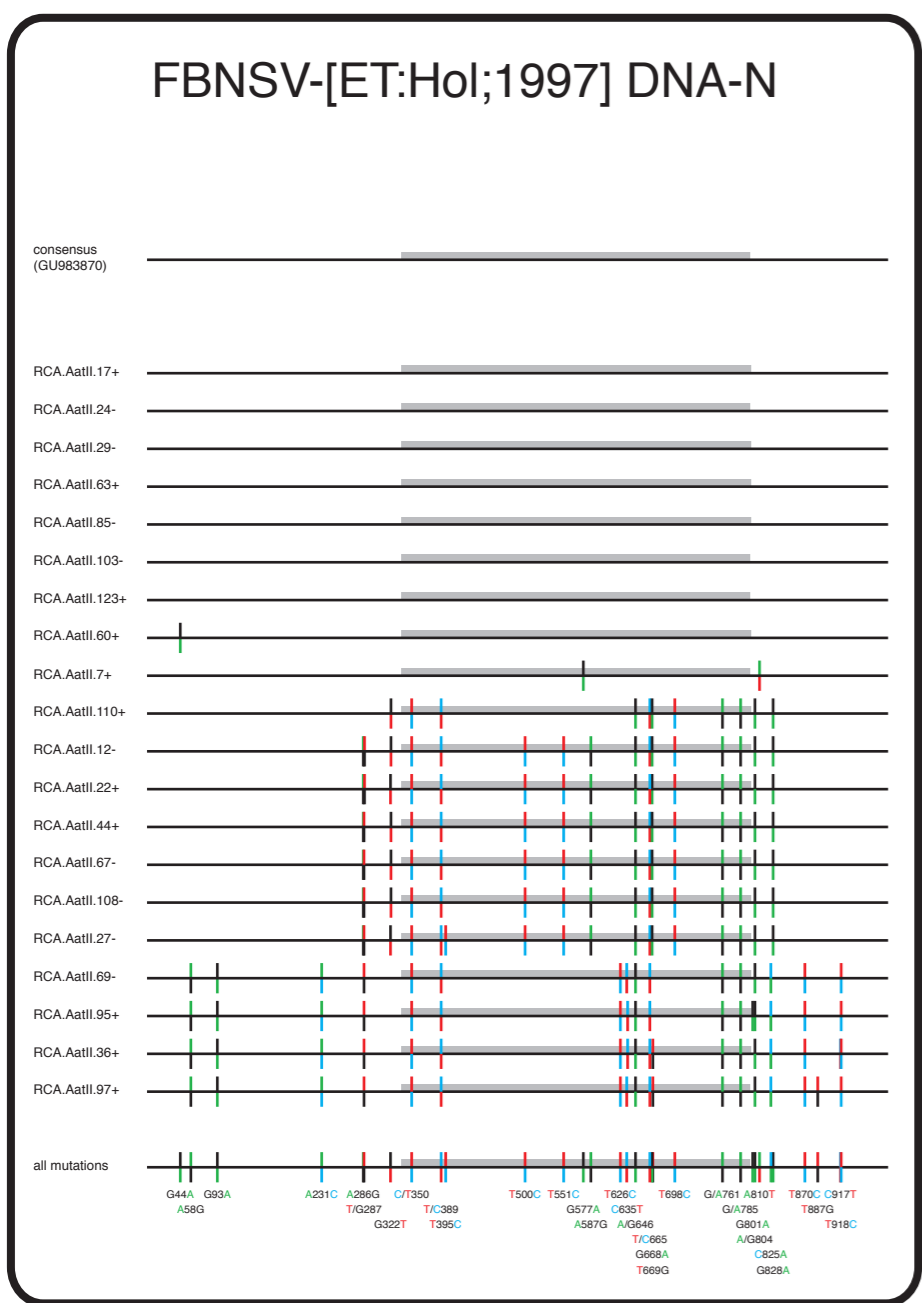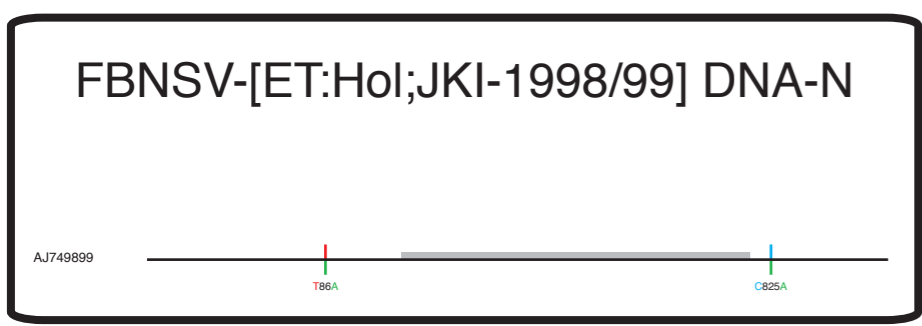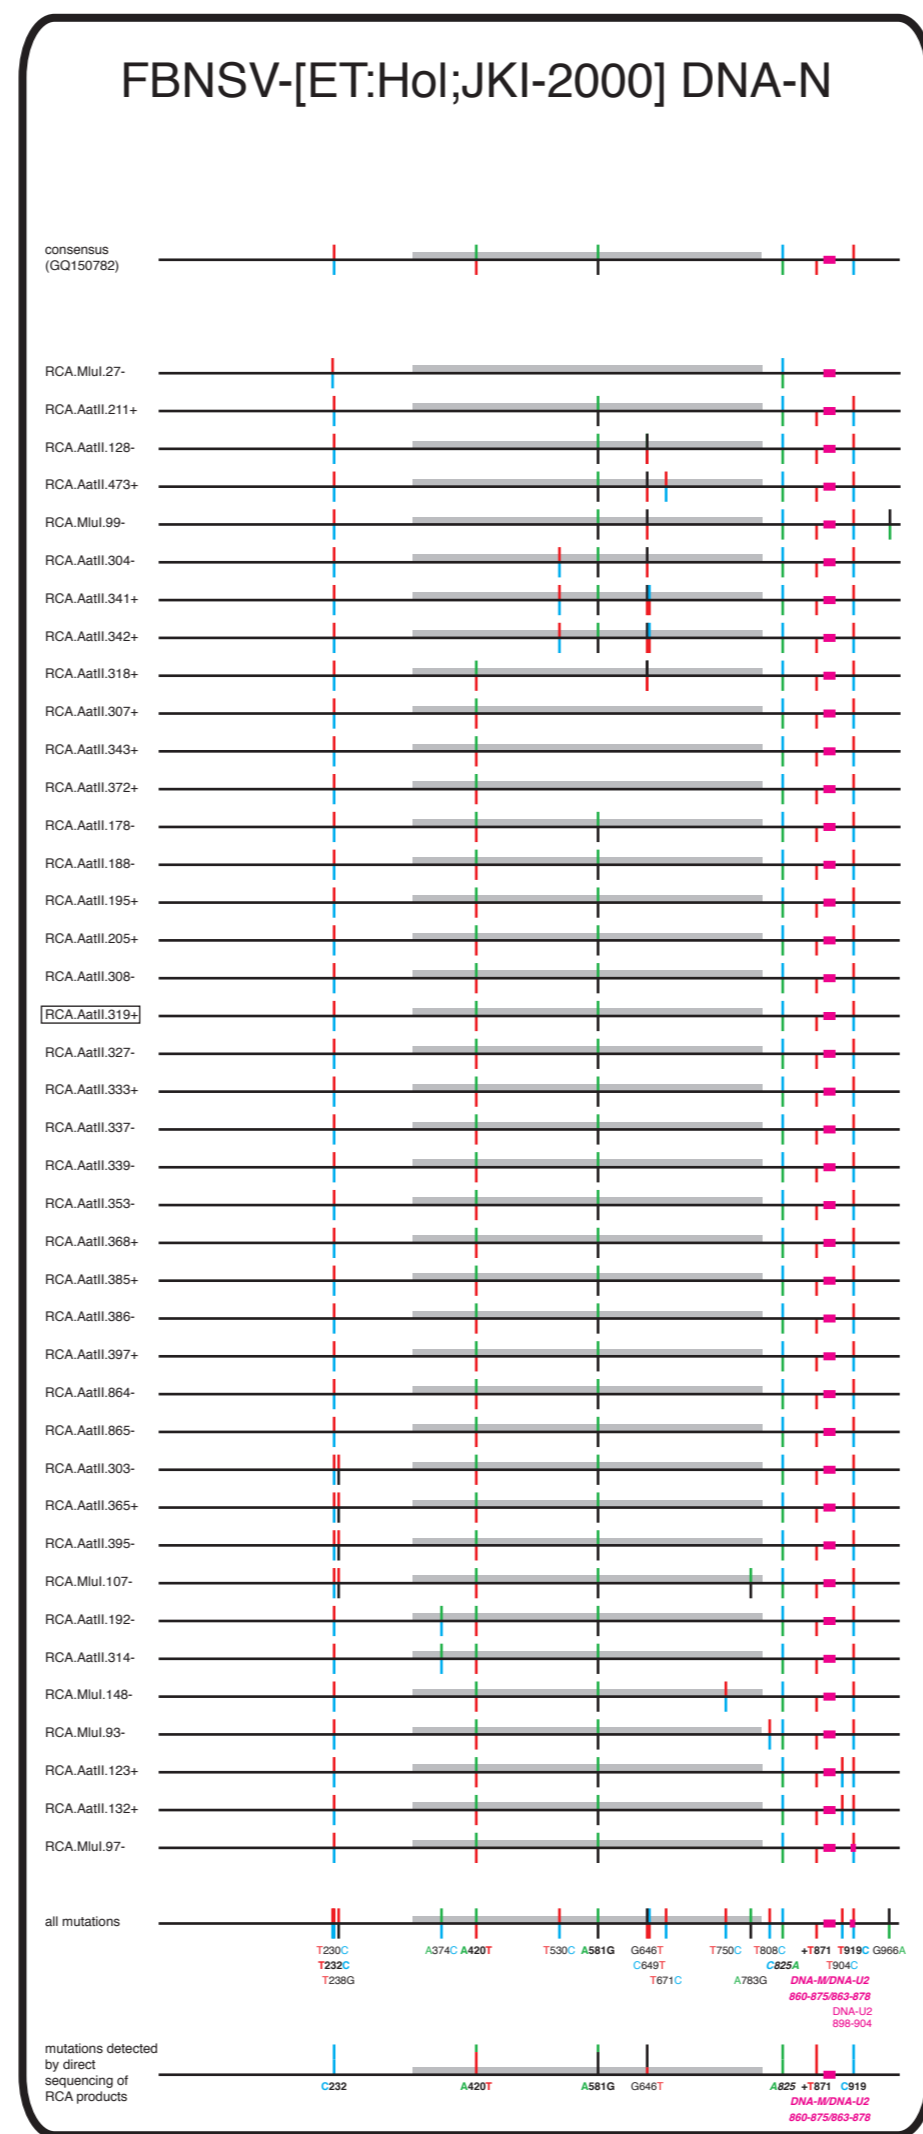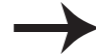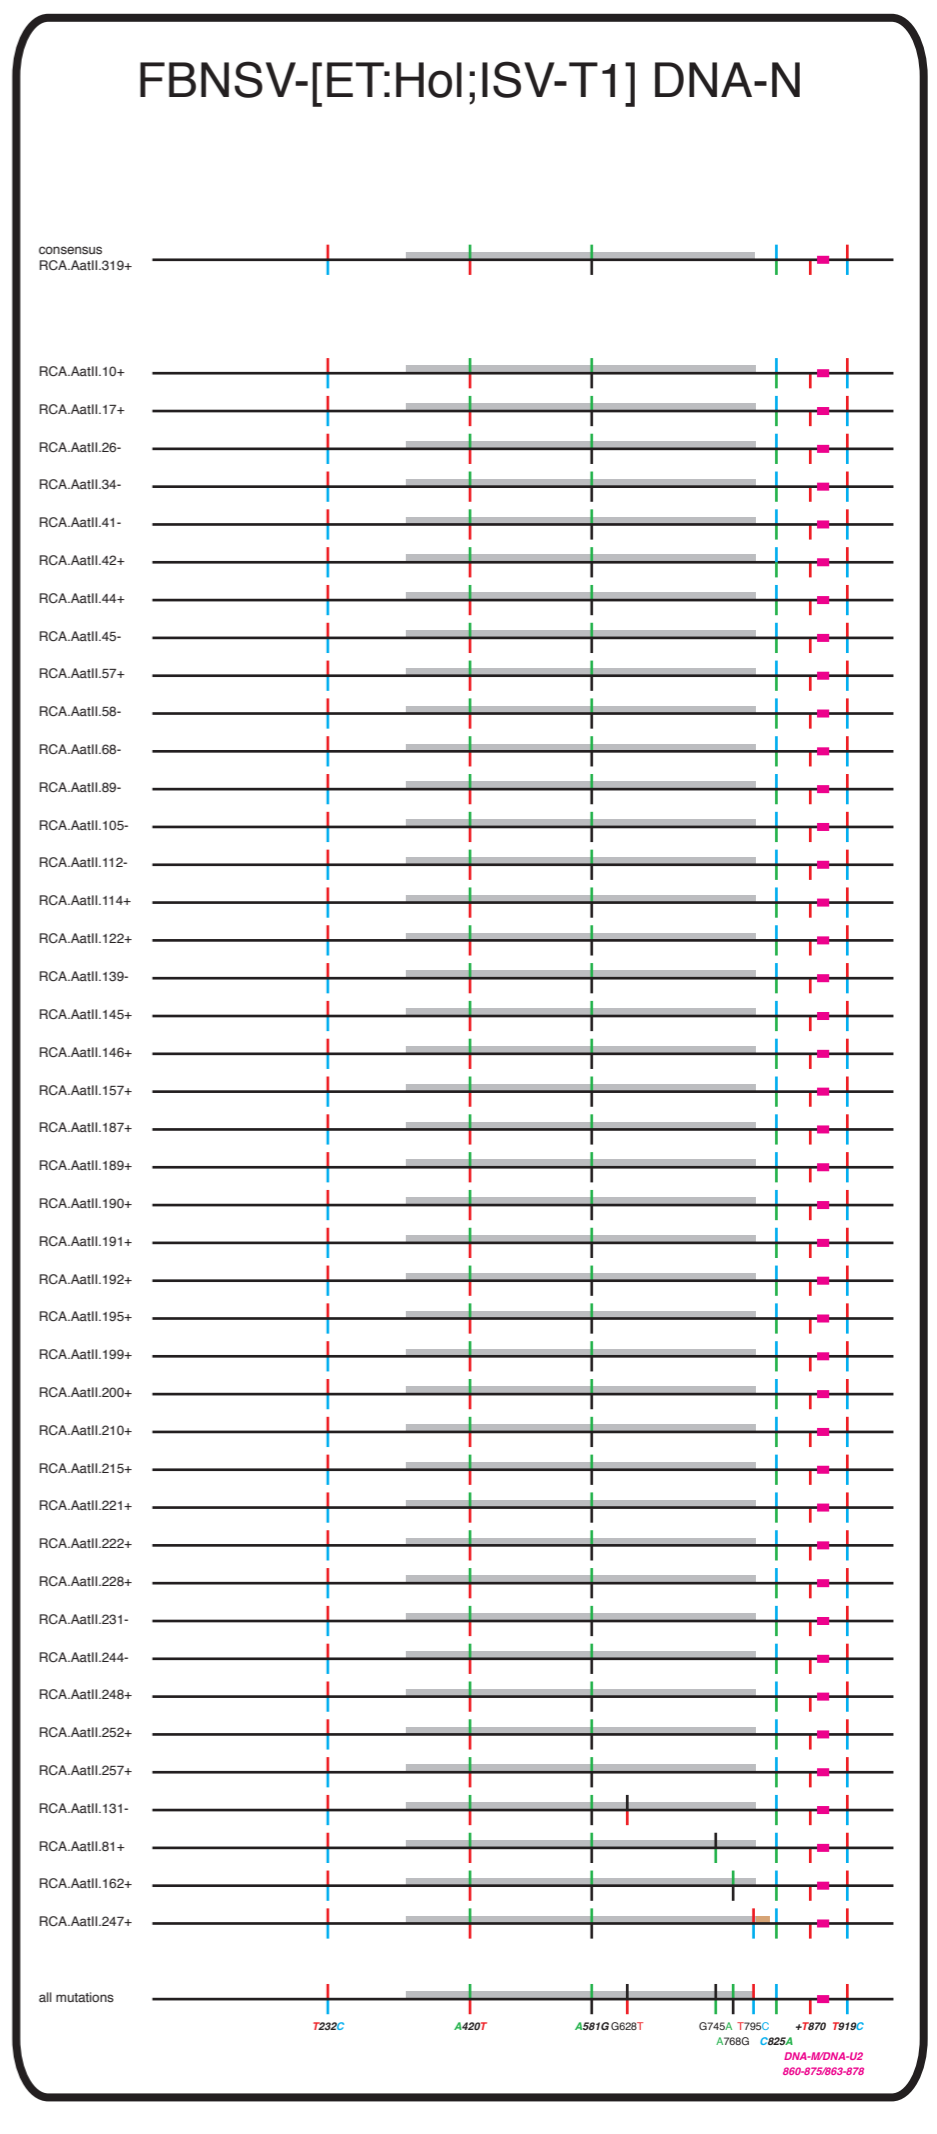

Figure S1 E

### FBNSV-[ET:HoI;1997] DNA-U1

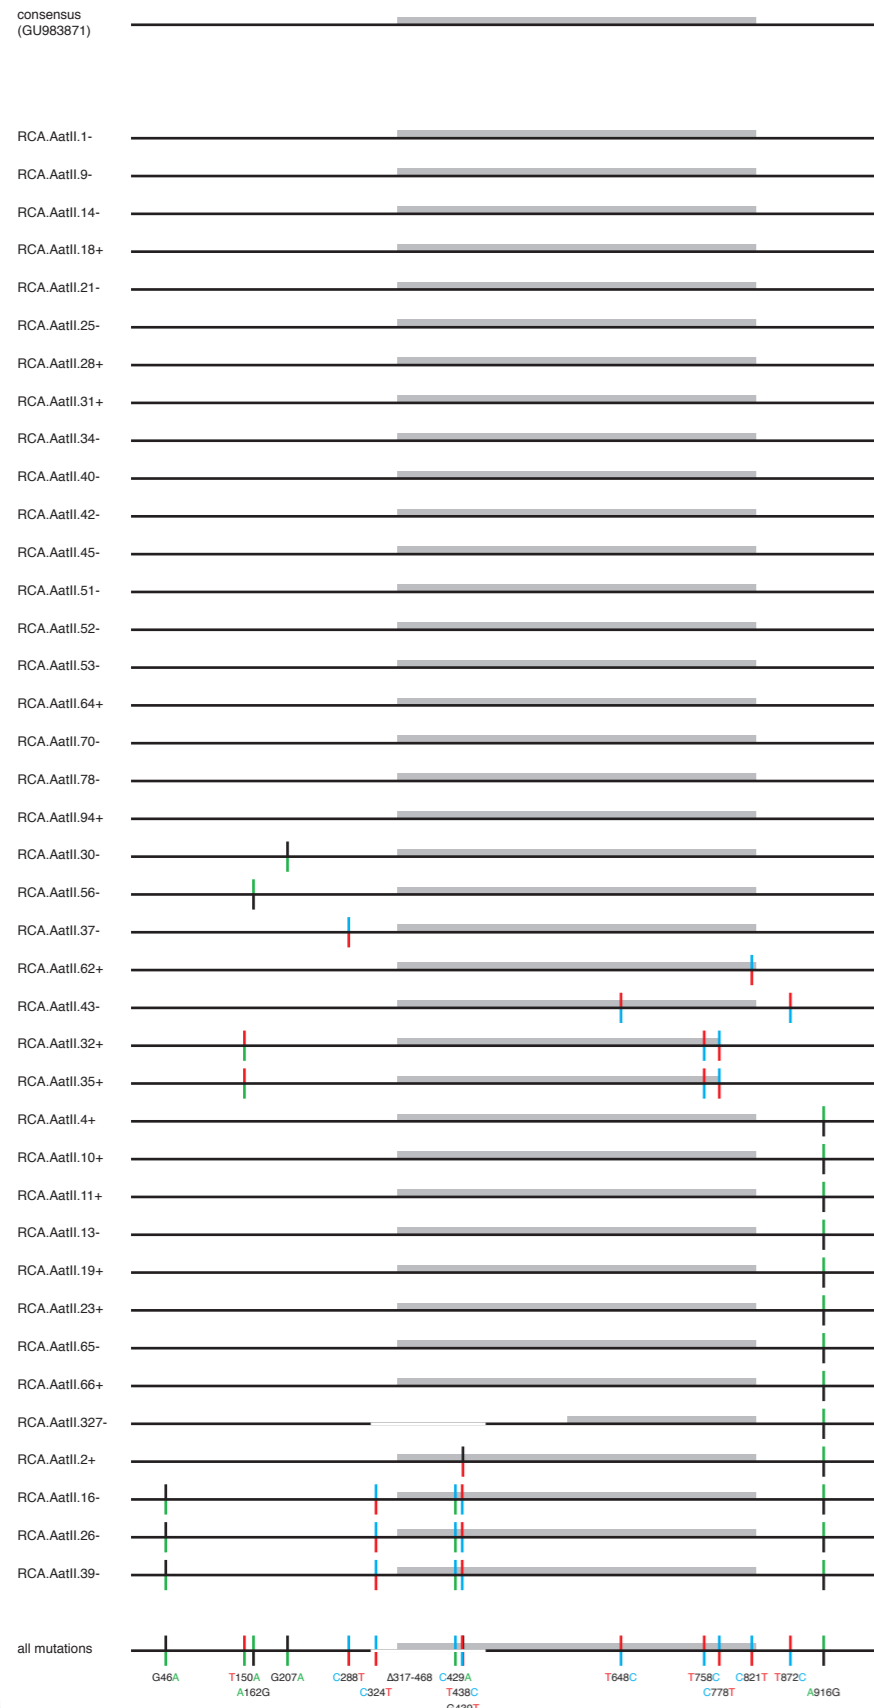

### FBNSV-[ET:HoI;JKI-2000] DNA-U1

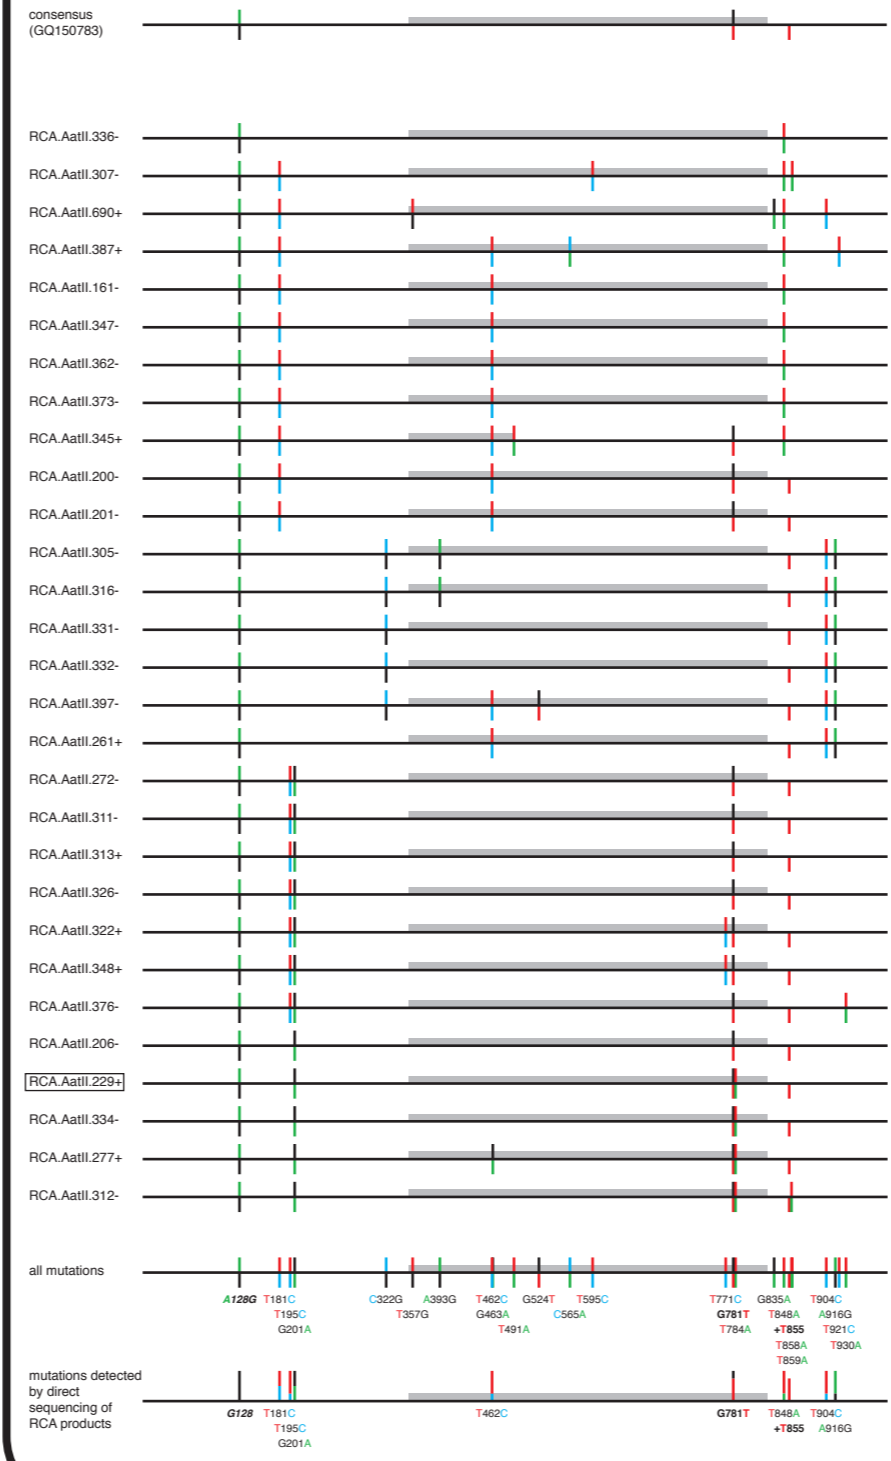

### FBNSV-[ET:HoI;JKI-1998/99] DNA-U1

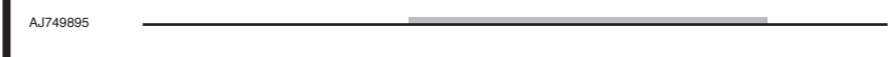

### FBNSV-[ET:HoI;ISV-T1] DNA-U1

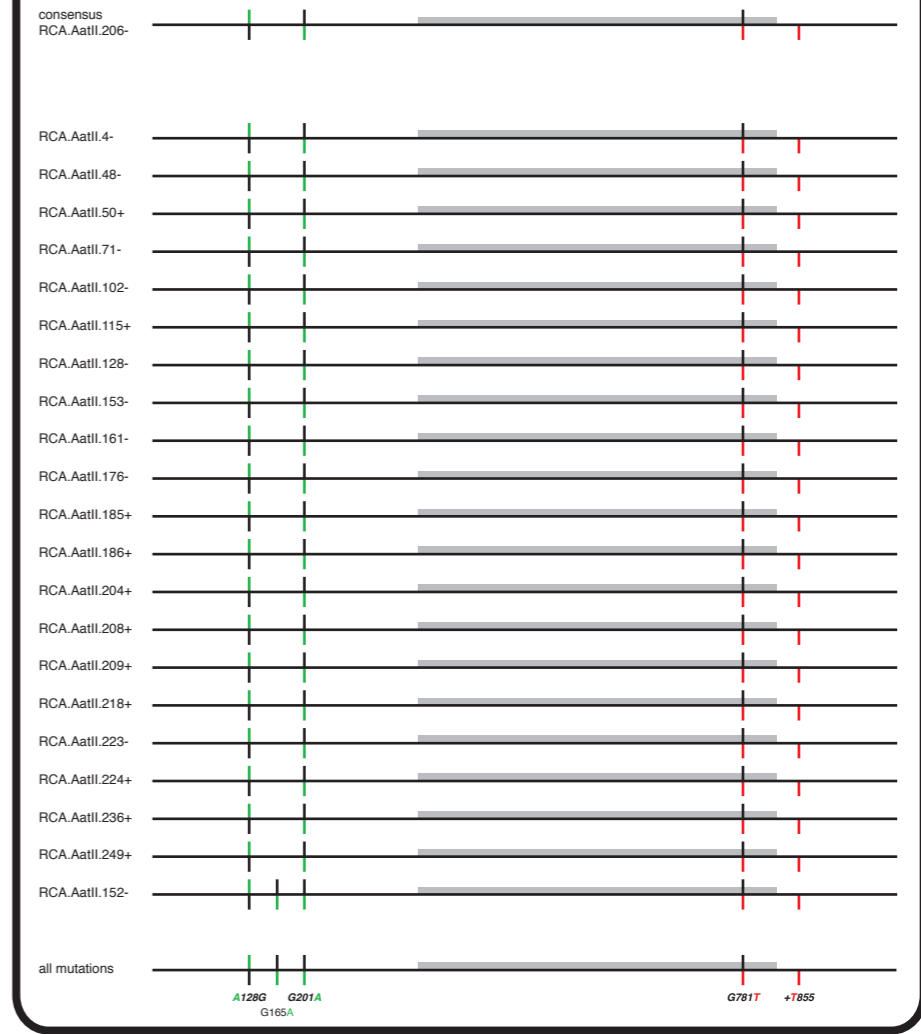

Figure S1 F



### FBNSV-[ET:Hol;1997] DNA-U2

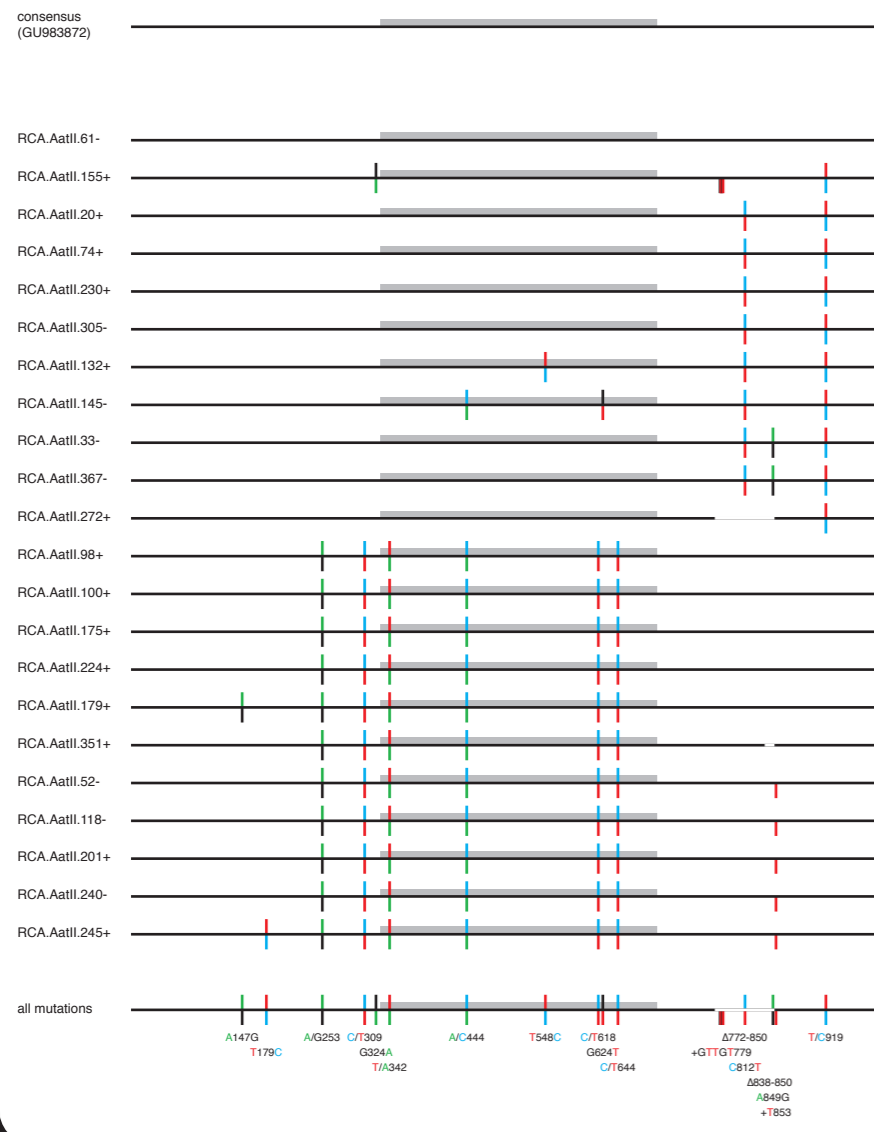

### FBNSV-[ET:Hol;JKI-2000] DNA-U2

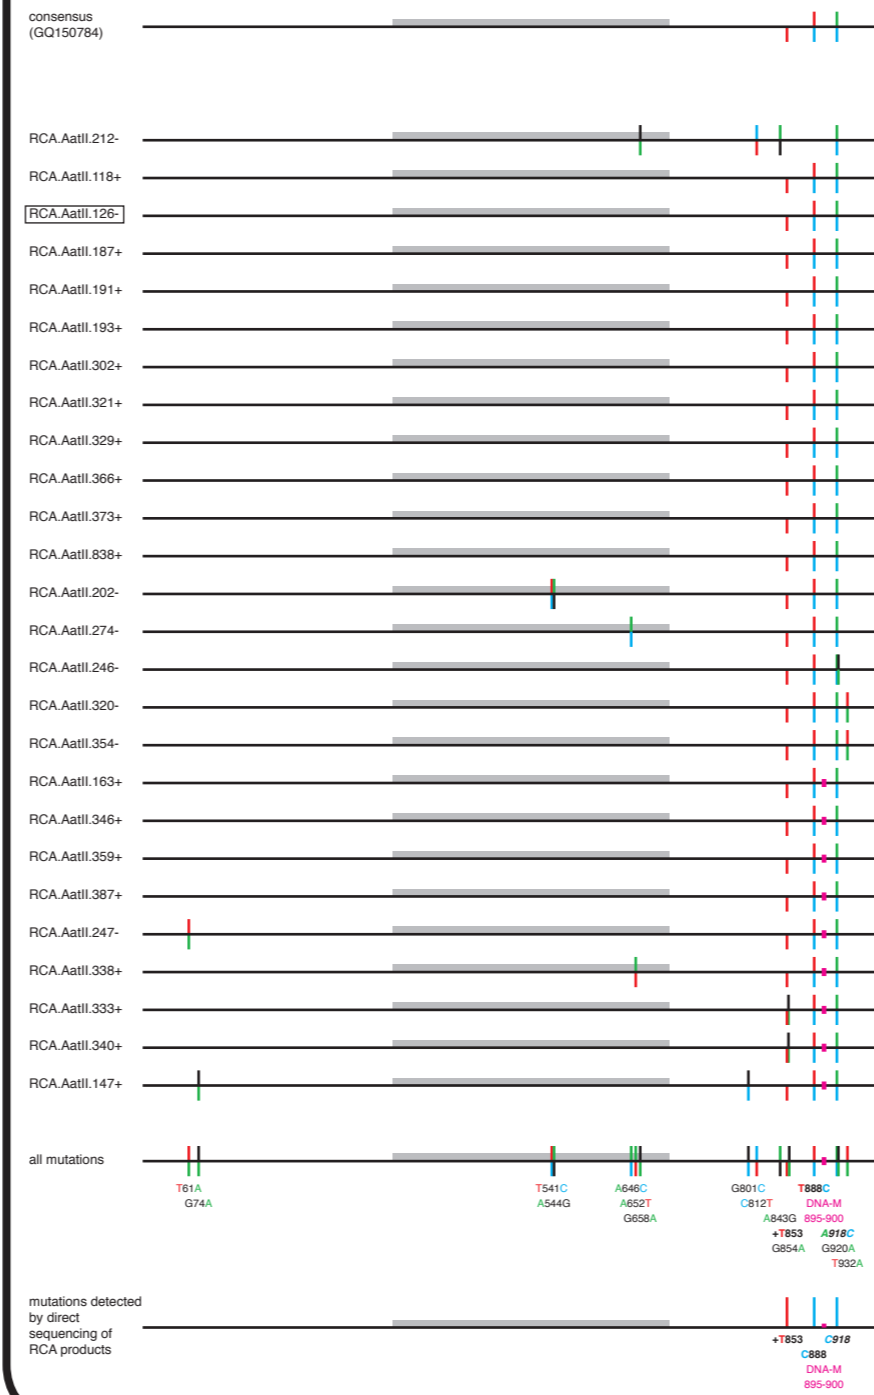

### FBNSV-[ET:Hol;ISV-T1] DNA-U2

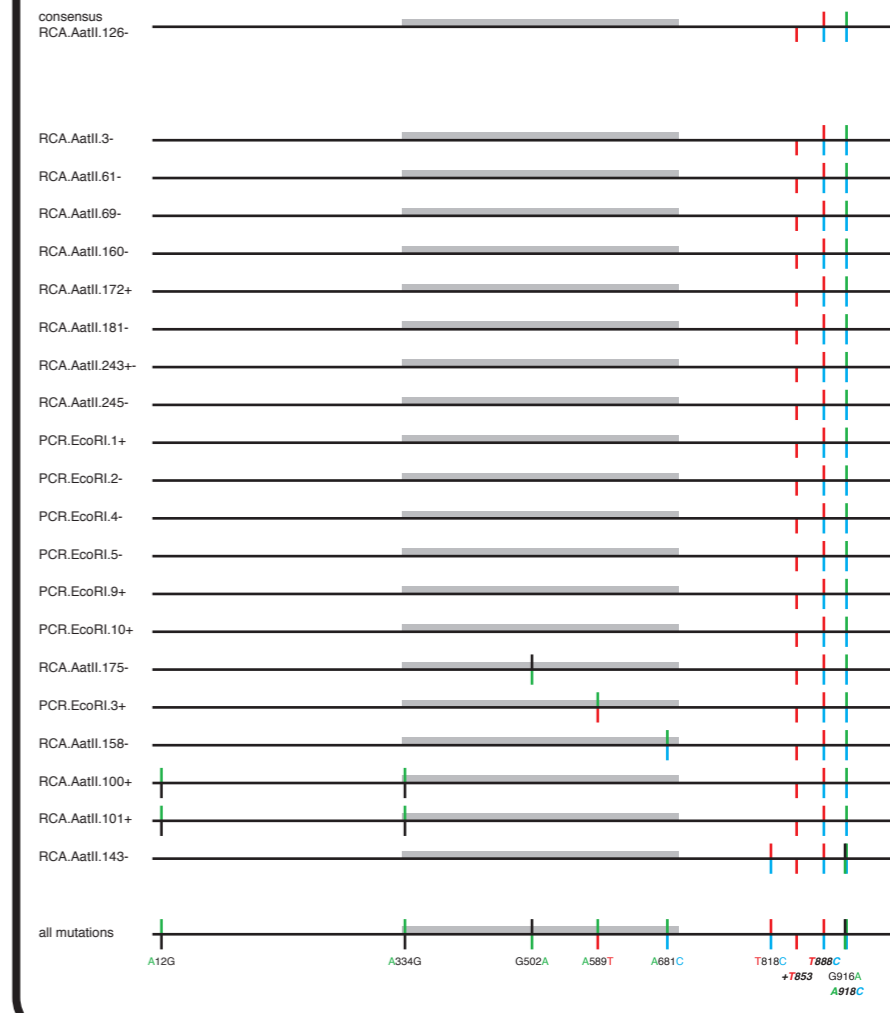

### FBNSV-[ET:Hol;JKI-1998/99] DNA-U2

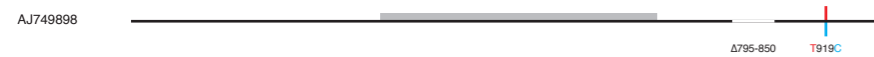

Figure S1 G

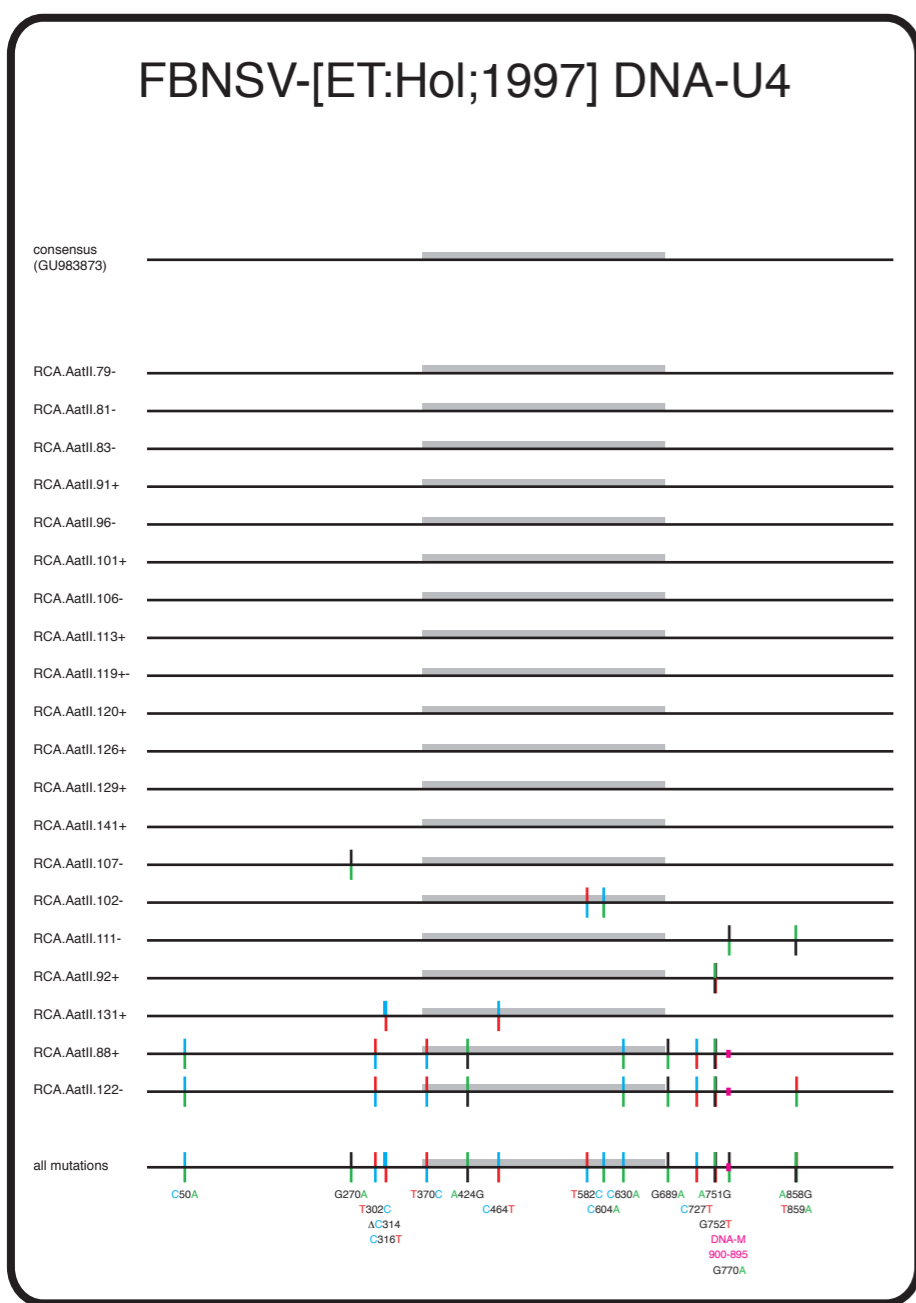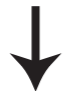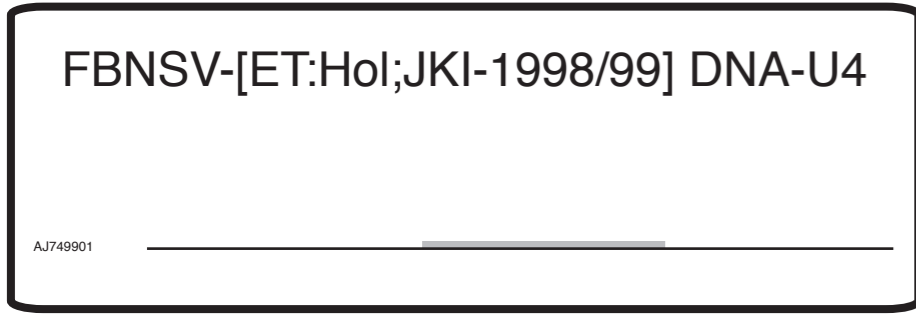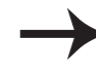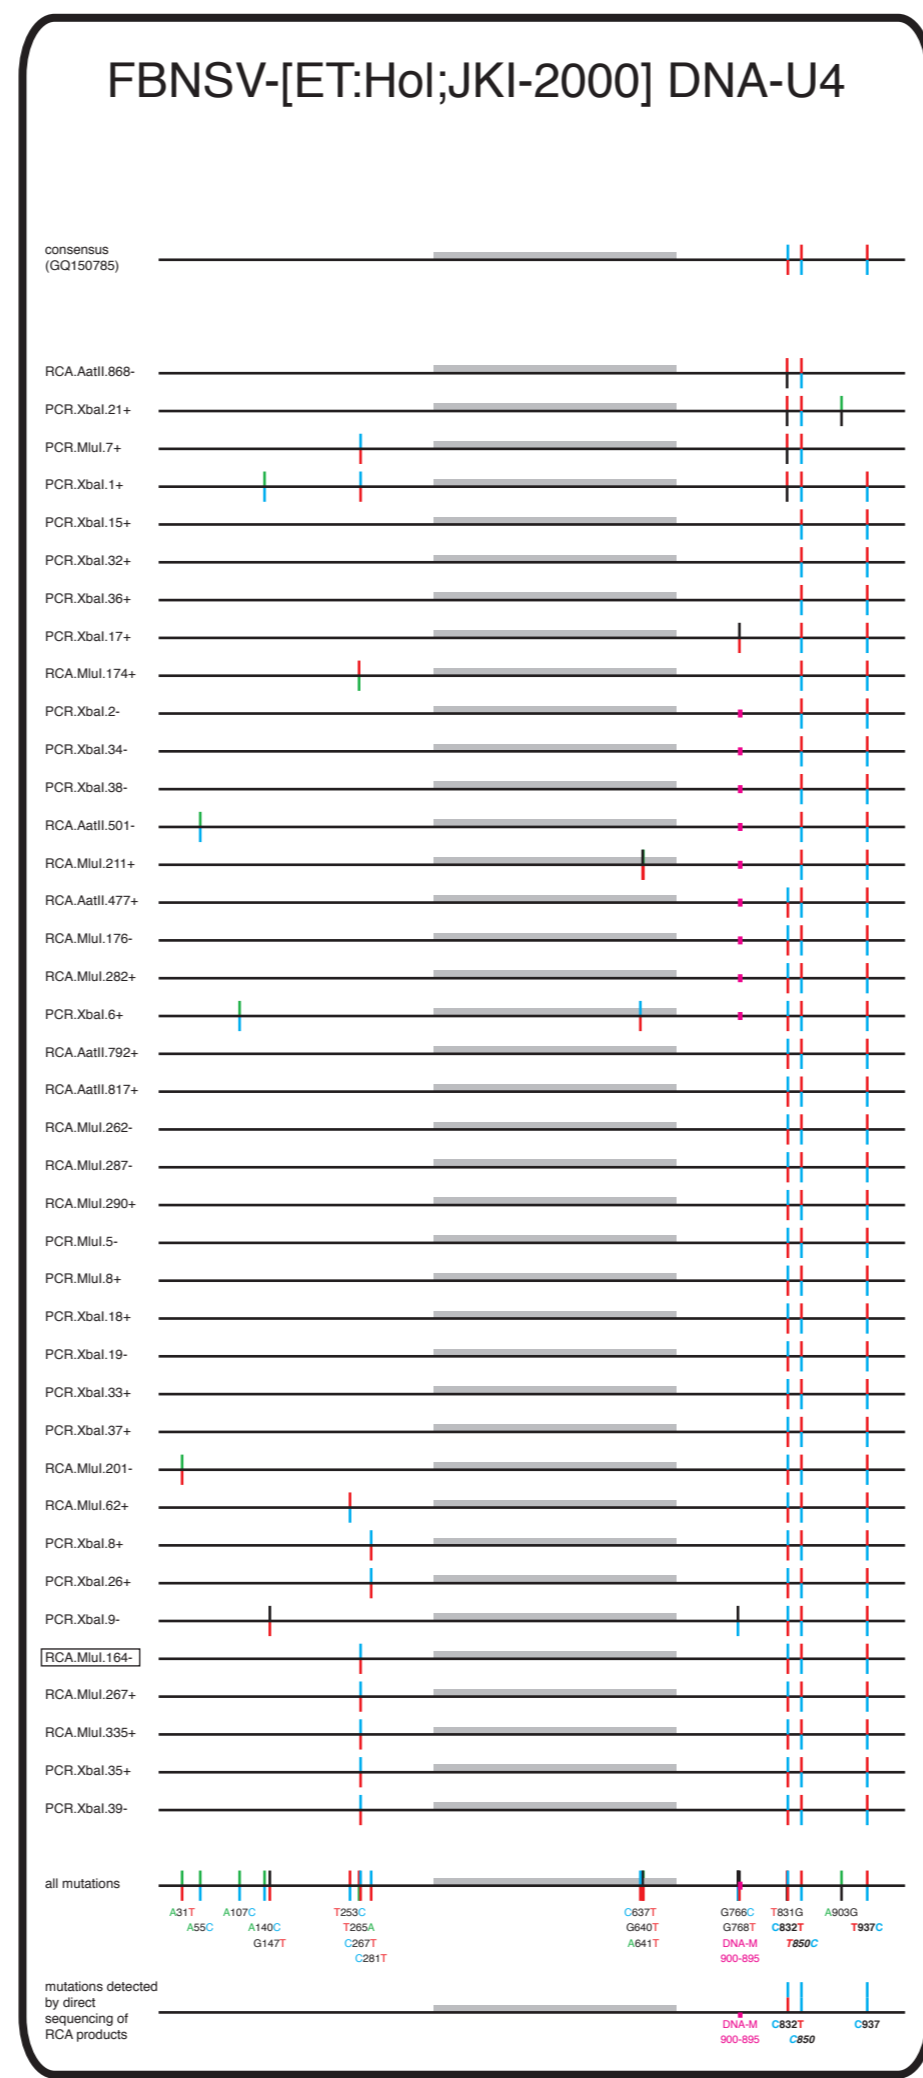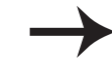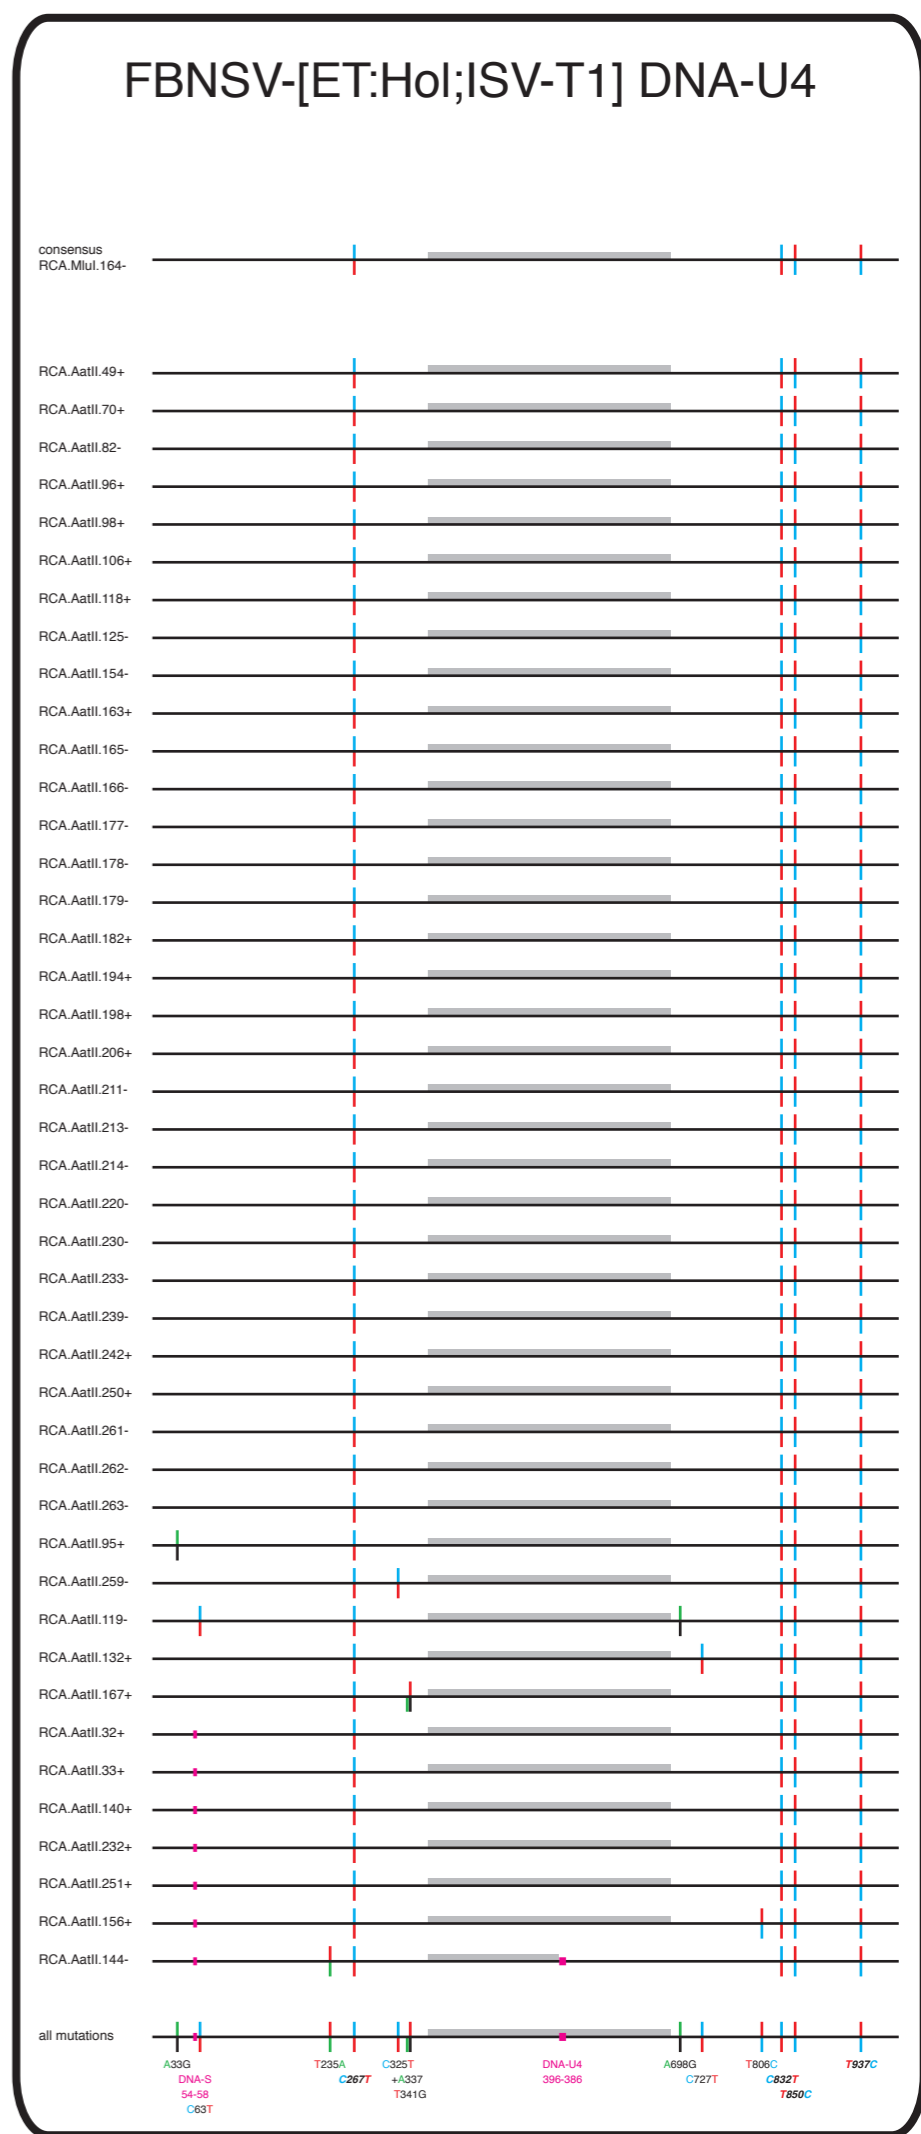

Figure S1 H

**Supplementary Figure S2. Sequences between CR-II and CR-I and their transpositional inversion in DNA-U4.**

**A.** Multialignment of sequences between CR-II, highlighted in blue, and the 5' part of CR-I, highlighted in green, that are mutated, probably due to sequence conversion. Arrows mark iteron-like sequences (a) and their inversions (a') in the CR-I. The 5' stem- and the loop sequence are marked. A vertical arrow indicates position zero. Genome component names and virus isolates are shown at the left, along with the proportion of the respective DNAs among the sequenced molecules. The >16 nt sequences in CR-II of DNA-N from the FBNSV-[ET:Hol;1997] population that had disappeared in the FBNSV-[ET:Hol;JKI-2000] population due to sequence conversion by recombination are highlighted in dark blue. The two versions of the three informative nucleotide changes are highlighted in yellow (AG-TCTT) or magenta (TGCTCTC), respectively. The 60/61-nt sequences of DNA-M and DNA-U2 that occur inverted and transposed in DNA-U4 are highlighted in purple.

**B.** Line drawing illustrating the position in DNA-U4 of the 60/61-nt sequences similar to, or derived from, sequences between CR-II and CR-I of DNA-M or DNA-U2 as transposed inversion (purple arrows). Grey bars represent coding sequences.

**C.** Multialignment of individual DNA-U4 sequences defining the common region M-U2-U4, shown as reverse complement and highlighted in purple. The two versions of the three informative nucleotide changes are highlighted in yellow (AG-TCTT) or magenta (TGCTCTC), respectively.



**Table S1.** Oligonucleotides used in this study.

| Specific for:           | Name              | Sequence 5'-3'                   | FBNSV-[ET:Hol] isolate: |             |          |        |
|-------------------------|-------------------|----------------------------------|-------------------------|-------------|----------|--------|
|                         |                   |                                  | 1997                    | JKI-1998/99 | JKI-2000 | ISV-T1 |
| DNA-R                   | Hol-R-EcoRI-dir   | TAGAGAATTCAGAGGAGAACTGAAGAAGAA   | x                       |             |          | x      |
|                         | Hol-R-EcoRI-rev   | CTCTGAATTCTCTAAGCGTACTTGCAGACT   | x                       |             |          | x      |
|                         | P3                | ATATGCTGGTGCTTTACA               |                         | x           |          |        |
|                         | P20               | AATTACAATCCTATCCTCACT            |                         | x           |          |        |
|                         | P45               | AACTCTCCATACTCCCA(A/T)GGACCTTCAA |                         | x           |          |        |
|                         | P47               | TATGGCCCACAAGGTGGAGAAGGG         |                         | x           |          |        |
| DNA-S                   | Hol-S-PstI-dir    | TGGTCTGCAGCTTTCACAGCACCTGCTCTA   |                         |             |          | x      |
|                         | Hol-S-PstI-rev    | AAAGCTGCAGACCAATTAACAATAGGTGAA   |                         |             |          | x      |
|                         | P67               | CTCCATCTCAGCCGTTTCATTG           |                         | x           |          |        |
|                         | P68               | ACAGCCTTAACAGCTTCACTGG           |                         | x           |          |        |
| DNA-C                   | Hol-C-HindIII-dir | TAAAAAAGCTTCGTCTTCTTCGTTGTTTCAT  |                         |             |          | x      |
|                         | Hol-C-HindIII-rev | GACGAAGCTTTTTTATAGAAGAGAGAGAAA   |                         |             |          | x      |
|                         | P69               | AGGTCTTCAGTTGATGGGT              |                         | x           |          |        |
|                         | P70               | TGGCATGTAGAGAGTTGCTG             |                         | x           |          |        |
| DNA-M                   | Hol-M-HindIII-dir | TATGAAGCTTGTTATGTTGTATATTTCATGT  |                         |             |          | x      |
|                         | Hol-M-HindIII-rev | TAACAAGCTTCATATTTTCTTGAACACTTA   |                         |             |          | x      |
|                         | P51               | ACGAAGCAAAGCATATATTTCAGTGC       |                         | x           |          |        |
|                         | P53               | TGGAAGCGTGGTTGAATTCTTCATC        |                         | x           |          |        |
| DNA-N                   | P65               | GCTCACACTGCAACTAACAAG            |                         | x           |          |        |
|                         | P66               | ACAGGAACGTTCTGGTCA               |                         | x           |          |        |
| DNA-U1                  | P71               | TATAACATAATCTGAACTTC             |                         | x           |          |        |
|                         | P72               | TTAACGCTTCTTGGCTGTCG             |                         | x           |          |        |
| DNA-U2                  | Hol-U2-EcoRI-dir  | TGGTGAATTCTGCAGACTCCATGGAAGAAG   |                         |             |          | x      |
|                         | Hol-U2-EcoRI-rev  | TGCAGAATTCACCAAGAACATCTTTCGTGGG  |                         |             |          | x      |
|                         | P50               | TTAAGTTAATAAATGACATCTATC         |                         | x           |          |        |
|                         | P55               | GCTGATACTATCCTTCCATG             |                         | x           |          |        |
| DNA-U4                  | Hol-U4-XbaI-dir   | TTATTCTAGATTAAGAAGTTACTGTCCAGG   |                         |             | x        |        |
|                         | Hol-U4-XbaI-rev   | TTAATCTAGAATAATTACTTCTGAATAAAG   |                         |             | x        |        |
|                         | Hol-U4-MluI-dir   | CTTCACGCGTTTTGAAGCTACTGTGATTA    |                         |             | x        |        |
|                         | Hol-U4-MluI-rev   | CAAAACGCGTGAAGAGATAAAGTGTACAAT   |                         |             | x        |        |
|                         | P58               | GGTTGAAGGCGATGATCTTG             |                         | x           |          |        |
|                         | P59               | GTTTCCAGACCCAGAGTCTTTAG          |                         | x           |          |        |
| DNA-S,-C,-N,<br>-U1,-U4 | P23               | CACGAATCACAGATCCTGAT             |                         | x           |          |        |
|                         | P44               | AAGCGAA(A/T/C)CTGACGGAAGA        |                         | x           |          |        |
| DNA-S,-C,-U1            | P22               | ATGGTTCTCTCTCTATAAAAGCT          |                         | x           |          |        |
|                         | P23               | CACGAATCACAGATCCTGAT             |                         | x           |          |        |
| DNA-M,-U2               | P60               | GATGGTCCCCTCCGCACTA              |                         | x           |          |        |
|                         | P61               | AATAGCATGTGCGTCTCACGTG           |                         | x           |          |        |

Table S2. Variability of field isolated and laboratory propagated FBNSV.

| <b>A: FBNSV-[ET:Hol;1997]</b> |             |                         |                              |                |                   |                                         |                 |                                                           |          |
|-------------------------------|-------------|-------------------------|------------------------------|----------------|-------------------|-----------------------------------------|-----------------|-----------------------------------------------------------|----------|
| Genome component              | Length (nt) | Number sequenced clones | Number different clone types | Variable sites |                   | Mutation frequency ( $\times 10^{-4}$ ) | Shannon entropy | Genetic Distance ( $\times 10^{-3}$ ) (Tamura-Nei method) |          |
|                               |             |                         |                              | Total          | Maximum per clone |                                         |                 | Distance                                                  | Std.Err. |
| DNA-R                         | 1003        | 20                      | 5                            | 8              | 5                 | 3.99                                    | 0.37            | 2.28                                                      | 0.86     |
| DNA-S                         | 992         | 26                      | 10                           | 12             | 2                 | 4.65                                    | 0.46            | 1.01                                                      | 0.29     |
| DNA-C                         | 994         | 20                      | 10                           | 20             | 10                | 10.06                                   | 0.62            | 5.57                                                      | 1.47     |
| DNA-M                         | 979         | 20                      | 11                           | 18             | 10                | 9.41                                    | 0.70            | 1.54                                                      | 0.41     |
| DNA-N                         | 980         | 20                      | 10                           | 32             | 10                | 16.33                                   | 0.64            | 11.85                                                     | 2.35     |
| DNA-U1                        | 985         | 39                      | 11                           | 16             | 5                 | 4.18                                    | 0.46            | 1.46                                                      | 0.61     |
| DNA-U2                        | 983         | 22                      | 12                           | 18             | 9                 | 8.35                                    | 0.73            | 4.59                                                      | 1.58     |
| DNA-U4                        | 987         | 20                      | 8                            | 19             | 10                | 9.63                                    | 0.44            | 3.01                                                      | 0.74     |
| Entire genome                 | 7903        | 187                     | 77                           | 143            | 61                | 7.77                                    |                 |                                                           |          |

  

| <b>B: FBNSV-[ET:Hol;JKI-2000]</b> |             |                         |                              |                |                   |                                         |                 |                                                           |          |
|-----------------------------------|-------------|-------------------------|------------------------------|----------------|-------------------|-----------------------------------------|-----------------|-----------------------------------------------------------|----------|
| Genome component                  | Length (nt) | Number sequenced clones | Number different clone types | Variable sites |                   | Mutation frequency ( $\times 10^{-4}$ ) | Shannon entropy | Genetic Distance ( $\times 10^{-3}$ ) (Tamura-Nei method) |          |
|                                   |             |                         |                              | Total          | Maximum per clone |                                         |                 | Distance                                                  | Std.Err. |
| DNA-R                             | 1003        | 22                      | 8                            | 8              | 3                 | 3.63                                    | 0.52            | 1.20                                                      | 0.44     |
| DNA-S                             | 992         | 29                      | 10                           | 13             | 6                 | 4.52                                    | 0.56            | 3.32                                                      | 0.98     |
| DNA-C                             | 994         | 20                      | 6                            | 5              | 1                 | 2.52                                    | 0.36            | 0.59                                                      | 0.25     |
| DNA-M                             | 980         | 27                      | 14                           | 19             | 8                 | 7.18                                    | 0.72            | 6.62                                                      | 1.26     |
| DNA-N                             | 981         | 40                      | 17                           | 18             | 6                 | 4.59                                    | 0.60            | 1.96                                                      | 0.61     |
| DNA-U1                            | 986         | 29                      | 18                           | 24             | 7                 | 8.40                                    | 0.82            | 5.17                                                      | 1.29     |
| DNA-U2                            | 984         | 26                      | 11                           | 16             | 5                 | 6.26                                    | 0.59            | 2.21                                                      | 0.78     |
| DNA-U4                            | 987         | 39                      | 18                           | 19             | 6                 | 4.94                                    | 0.68            | 2.64                                                      | 0.80     |
| Entire genome                     | 7907        | 232                     | 102                          | 122            | 42                | 5.33                                    |                 |                                                           |          |

  

| <b>C: FBNSV-[ET:Hol;ISV-T1]</b> |             |                         |                              |                |                   |                                         |                 |                                                           |          |
|---------------------------------|-------------|-------------------------|------------------------------|----------------|-------------------|-----------------------------------------|-----------------|-----------------------------------------------------------|----------|
| Genome component                | Length (nt) | Number sequenced clones | Number different clone types | Variable sites |                   | Mutation frequency ( $\times 10^{-4}$ ) | Shannon entropy | Genetic Distance ( $\times 10^{-3}$ ) (Tamura-Nei method) |          |
|                                 |             |                         |                              | Total          | Maximum per clone |                                         |                 | Distance                                                  | Std.Err. |
| DNA-R                           | 1003        | 20                      | 3                            | 4              | 3                 | 2.00                                    | 0.13            | 0.31                                                      | 0.17     |
| DNA-S                           | 992         | 20                      | 5                            | 5              | 2                 | 2.52                                    | 0.30            | 0.67                                                      | 0.32     |
| DNA-C                           | 994         | 20                      | 4                            | 3              | 1                 | 1.51                                    | 0.20            | 0.30                                                      | 0.17     |
| DNA-M                           | 980         | 20                      | 4                            | 4              | 2                 | 2.04                                    | 0.20            | 0.31                                                      | 0.18     |
| DNA-N                           | 981         | 42                      | 5                            | 4              | 1                 | 0.97                                    | 0.12            | 0.19                                                      | 0.10     |
| DNA-U1                          | 986         | 21                      | 2                            | 1              | 1                 | 0.48                                    | 0.06            | 0.10                                                      | 0.09     |
| DNA-U2                          | 984         | 20                      | 6                            | 7              | 2                 | 3.56                                    | 0.36            | 0.90                                                      | 0.36     |
| DNA-U4                          | 987         | 43                      | 9                            | 11             | 3                 | 2.59                                    | 0.29            | 1.23                                                      | 0.43     |
| Entire genome                   | 7907        | 206                     | 38                           | 39             | 15                | 1.92                                    |                 |                                                           |          |

Table S3. Substitution rate from the field isolated to laboratory propagated FBNSV.

| Genome component | A: entire genome |                              |                                        | B: coding region |                              |                                        | C: non coding region |                              |                                        |
|------------------|------------------|------------------------------|----------------------------------------|------------------|------------------------------|----------------------------------------|----------------------|------------------------------|----------------------------------------|
|                  | Length (nt)      | Mutations fixed as consensus | Substitution rate ( $\times 10^{-3}$ ) | Length (nt)      | Mutations fixed as consensus | Substitution rate ( $\times 10^{-3}$ ) | Length (nt)          | Mutations fixed as consensus | Substitution rate ( $\times 10^{-3}$ ) |
| DNA-R            | 1003             | 2                            | 0.83                                   | 861              | 2                            | 0.96                                   | 142                  | 0                            | 0.00                                   |
| DNA-S            | 992              | 5                            | 2.09                                   | 519              | 5                            | 3.99                                   | 473                  | 0                            | 0.00                                   |
| DNA-C            | 994              | 2                            | 0.83                                   | 510              | 0                            | 0.00                                   | 484                  | 2                            | 1.71                                   |
| DNA-M            | 979              | 9                            | 3.80                                   | 357              | 2                            | 2.32                                   | 622                  | 7                            | 4.66                                   |
| DNA-N            | 980              | 7                            | 2.96                                   | 462              | 2                            | 1.79                                   | 518                  | 5                            | 3.99                                   |
| DNA-U1           | 985              | 3                            | 1.26                                   | 474              | 1                            | 0.87                                   | 511                  | 2                            | 1.62                                   |
| DNA-U2           | 983              | 3                            | 1.26                                   | 366              | 0                            | 0.00                                   | 617                  | 3                            | 2.01                                   |
| DNA-U4           | 987              | 3                            | 1.26                                   | 312              | 0                            | 0.00                                   | 675                  | 3                            | 1.84                                   |
| Entire genome    | 7903             | 34                           | 1.78                                   | 3861             | 12                           | 1.29                                   | 4042                 | 22                           | 2.25                                   |

Table S4. Mutant spectra of field isolated and laboratory propagated FBNSV

| Coding region        | A: FBNSV-[ET:Hol;1997] |       |                    |                    | B: FBNSV-[ET:Hol;JKI-2000] |       |          |                 | C: FBNSV-[ET:Hol;ISV-T1] |       |          |                 |
|----------------------|------------------------|-------|--------------------|--------------------|----------------------------|-------|----------|-----------------|--------------------------|-------|----------|-----------------|
|                      | Obs.                   | Exp.  | $\chi^2$           | <i>p</i> -value    | Obs.                       | Exp.  | $\chi^2$ | <i>p</i> -value | Obs.                     | Exp.  | $\chi^2$ | <i>p</i> -value |
| Transitions (Ts)     | 38                     | 22.33 | 16.4851            | 4.90E-05           | 28                         | 15.67 | 14.5638  | 0.0001          | 8                        | 5.33  | 2        | 0.1573          |
| A → G                | 2 (+3)*                | 6.93  | 3.9167 to 0.6020   | 0.0478 to 0.4378   | 5                          | 4.86  | 0.0048   | 0.9446          | 2                        | 1.65  | 0.0813   | 0.7755          |
| G → A                | 5 (+3)                 | 5.24  | 0.0117 to 1.5811   | 0.9140 to 0.2086   | 5                          | 3.67  | 0.5265   | 0.4681          | 2                        | 1.25  | 0.4915   | 0.4833          |
| C → T                | 9 (+6)                 | 3.24  | 10.7564 to 44.8417 | 0.0010 to 2.14E-11 | 3                          | 2.30  | 0.2230   | 0.6368          | 1                        | 0.78  | 0.0629   | 0.8019          |
| T → C                | 13 (+6)                | 6.92  | 5.9543 to 23.5089  | 0.0147 to 1.24E-06 | 15                         | 4.84  | 23.7387  | 1.10E-06        | 3                        | 1.65  | 1.2339   | 0.2667          |
| Transversions (Tv)   | 29                     | 44.67 | 16.4851            | 4.90E-05           | 19                         | 31.33 | 14.5638  | 0.0001          | 8                        | 10.67 | 2        | 0.1573          |
| A → C                | 2 (+2)                 | 6.93  | 3.9167 to 1.3852   | 0.0478 to 0.2392   | 4                          | 4.86  | 0.1680   | 0.6819          | 2                        | 1.65  | 0.0813   | 0.7755          |
| C → A                | 6 (+2)                 | 3.24  | 2.4692 to 7.3455   | 0.1161 to 0.0067   | 2                          | 2.30  | 0.0415   | 0.8386          | 0                        | 0.78  | 0.8238   | 0.3641          |
| A → T                | 2 (+1)                 | 6.93  | 3.9167 to 2.4901   | 0.0478 to 0.1146   | 4                          | 4.86  | 0.1680   | 0.6819          | 2                        | 1.65  | 0.0813   | 0.7755          |
| T → A                | 3 (+1)                 | 6.92  | 2.4774 to 1.3749   | 0.1155 to 0.2410   | 3                          | 4.84  | 0.7827   | 0.3763          | 0                        | 1.65  | 1.8386   | 0.1751          |
| C → G                | 2                      | 3.24  | 0.4991             | 0.4799             | 0                          | 2.30  | 2.4199   | 0.1198          | 0                        | 0.78  | 0.8238   | 0.3641          |
| G → C                | 1                      | 5.24  | 3.7188             | 0.0538             | 0                          | 3.67  | 3.9761   | 0.0461          | 0                        | 1.25  | 1.3536   | 0.2447          |
| G → T                | 5 (+2)                 | 5.24  | 0.0117 to 0.6437   | 0.9140 to 0.4224   | 5                          | 3.67  | 0.5265   | 0.4681          | 4                        | 1.25  | 6.5819   | 0.0103          |
| T → G                | 3 (+2)                 | 6.92  | 2.4774 to 0.5947   | 0.1155 to 0.4406   | 1                          | 4.84  | 3.4011   | 0.0652          | 0                        | 1.65  | 1.8386   | 0.1751          |
| Ts/Tv                | 1.3                    | 0.5   |                    |                    | 1.5                        | 0.5   |          |                 | 1                        | 0.5   |          |                 |
| Deletions            | 2                      |       |                    |                    | 0                          |       |          |                 | 0                        |       |          |                 |
| Insertions           | 0                      |       |                    |                    | 0                          |       |          |                 | 0                        |       |          |                 |
| Recombination events | 0                      |       |                    |                    | 0                          |       |          |                 | 1                        |       |          |                 |

| Non coding region    | A: FBNSV-[ET:Hol;1997] |       |                    |                      | B: FBNSV-[ET:Hol;JKI-2000] |      |          |                 | C: FBNSV-[ET:Hol;ISV-T1] |      |          |                 |
|----------------------|------------------------|-------|--------------------|----------------------|----------------------------|------|----------|-----------------|--------------------------|------|----------|-----------------|
|                      | Obs.                   | Exp.  | $\chi^2$           | <i>p</i> -value      | Obs.                       | Exp. | $\chi^2$ | <i>p</i> -value | Obs.                     | Exp. | $\chi^2$ | <i>p</i> -value |
| Transitions (Ts)     | 48                     | 21.33 | 50                 | 1.54E-12             | 34                         | 22   | 9.8172   | 0.0017          | 13                       | 6    | 12.25    | 0.0005          |
| A → G                | 9 (+4)                 | 5.83  | 1.9022 to 9.7180   | 0.1678 to 0.0018     | 5                          | 5.97 | 0.1733   | 0.6772          | 3                        | 1.63 | 1.2671   | 0.2603          |
| G → A                | 11 (+4)                | 4.38  | 10.7657 to 27.6917 | 0.0010 to 1.42E-07   | 9                          | 4.53 | 4.7238   | 0.0297          | 2                        | 1.24 | 0.5060   | 0.4769          |
| C → T                | 13 (+2)                | 4.05  | 21.1235 to 31.6178 | 4.31E-06 to 1.88E-08 | 6                          | 4.22 | 0.8077   | 0.3688          | 3                        | 1.15 | 3.1925   | 0.0740          |
| T → C                | 9 (+2)                 | 7.08  | 0.5836 to 2.4362   | 0.4449 to 0.1186     | 14                         | 7.28 | 6.9677   | 0.0083          | 5                        | 1.99 | 5.1414   | 0.0234          |
| Transversions (Tv)   | 16                     | 42.67 | 50                 | 1.54E-12             | 32                         | 44   | 9.8172   | 0.0017          | 5                        | 12   | 12.25    | 0.0005          |
| A → C                | 2                      | 5.83  | 2.7643             | 0.0964               | 3                          | 5.97 | 1.6245   | 0.2025          | 1                        | 1.63 | 0.2675   | 0.6050          |
| C → A                | 3                      | 4.05  | 0.2902             | 0.5901               | 1                          | 4.22 | 2.6190   | 0.1056          | 0                        | 1.15 | 1.2260   | 0.2682          |
| A → T                | 2                      | 5.83  | 2.7643             | 0.0964               | 4                          | 5.97 | 0.7148   | 0.3979          | 0                        | 1.63 | 1.7918   | 0.1807          |
| T → A                | 3                      | 7.08  | 2.6462             | 0.1038               | 9                          | 7.28 | 0.4560   | 0.4995          | 2                        | 1.99 | 0.0001   | 0.9916          |
| C → G                | 1                      | 4.05  | 2.4511             | 0.1174               | 2                          | 4.22 | 1.2431   | 0.2649          | 0                        | 1.15 | 1.2260   | 0.2682          |
| G → C                | 1                      | 4.38  | 2.7951             | 0.0946               | 4                          | 4.53 | 0.0675   | 0.7951          | 0                        | 1.24 | 1.3278   | 0.2492          |
| G → T                | 2 (+1)                 | 4.38  | 1.3843 to 0.4641   | 0.2394 to 0.4957     | 4                          | 4.53 | 0.0675   | 0.7951          | 0                        | 1.24 | 1.3278   | 0.2492          |
| T → G                | 1 (+1)                 | 7.08  | 5.8739 to 4.1013   | 0.0154 to 0.0429     | 5                          | 7.28 | 0.8033   | 0.3701          | 2                        | 1.99 | 0.0001   | 0.9916          |
| Ts/Tv                | 3                      | 0.5   |                    |                      | 1.1                        | 0.5  |          |                 | 2.6                      | 0.5  |          |                 |
| Deletions            | 4                      |       |                    |                      | 0                          |      |          |                 | 1                        |      |          |                 |
| Insertions           | 3                      |       |                    |                      | 3                          |      |          |                 | 2                        |      |          |                 |
| Recombination events | 3                      |       |                    |                      | 6                          |      |          |                 | 1                        |      |          |                 |

\* Numbers in brackets refer to potential additional mutations resulting from 50±10% ambiguities of the consensus (reference) base and the respective change. Note that these numbers have to be identical for reciprocal changes, e.g. A→G and G→A, etc. and they are counted only once for the total number of transitions or transversions.

Ts/Tv, Transition Transversion ratio

ND, not determined



| DNA-R<br>Genome         | A: FBNSV-[ET:Hol;1997] |      |          |                 | B: FBNSV-[ET:Hol;JKI-2000] |      |          |                 | C: FBNSV-[ET:Hol;ISV-T1] |      |          |                 |
|-------------------------|------------------------|------|----------|-----------------|----------------------------|------|----------|-----------------|--------------------------|------|----------|-----------------|
|                         | Obs.                   | Exp. | $\chi^2$ | <i>p</i> -value | Obs.                       | Exp. | $\chi^2$ | <i>p</i> -value | Obs.                     | Exp. | $\chi^2$ | <i>p</i> -value |
| Transitions<br>(Ts)     | 3                      | 2.67 | 0.0625   | 0.8026          | 8                          | 3    | 16       | 6.33E-05        | 1                        | 1    | 0        | 1               |
| A → G                   | 0                      | 0.83 | 0.9256   | 0.3360          | 2                          | 1    | 1.8422   | 0.1747          | 0                        | 0.31 | 0.3471   | 0.5558          |
| G → A                   | 1                      | 0.67 | 0.1776   | 0.6735          | 3                          | 1    | 8.8461   | 0.0029          | 0                        | 0.25 | 0.2742   | 0.6006          |
| C → T                   | 1                      | 0.43 | 0.7955   | 0.3725          | 1                          | 0    | 0.7716   | 0.3797          | 0                        | 0.16 | 0.1729   | 0.6775          |
| T → C                   | 1                      | 0.74 | 0.1038   | 0.7473          | 2                          | 1    | 2.4231   | 0.1196          | 1                        | 0.27 | 2.1144   | 0.1459          |
| Transversions<br>(Tv)   | 5                      | 5.33 | 0.0625   | 0.8026          | 0                          | 5    | 16       | 6.33E-05        | 2                        | 2    | 0        | 1               |
| A → C                   | 1                      | 0.83 | 0.0390   | 0.8434          | 0                          | 1    | 0.9256   | 0.3360          | 1                        | 0.31 | 1.7020   | 0.1920          |
| C → A                   | 0                      | 0.43 | 0.4552   | 0.4999          | 0                          | 0    | 0.4611   | 0.4971          | 0                        | 0.16 | 0.1729   | 0.6775          |
| A → T                   | 1                      | 0.83 | 0.0390   | 0.8434          | 0                          | 1    | 0.9256   | 0.3360          | 0                        | 0.31 | 0.3471   | 0.5558          |
| T → A                   | 0                      | 0.74 | 0.8112   | 0.3678          | 0                          | 1    | 0.8048   | 0.3697          | 0                        | 0.27 | 0.3018   | 0.5828          |
| C → G                   | 0                      | 0.43 | 0.4552   | 0.4999          | 0                          | 0    | 0.4611   | 0.4971          | 0                        | 0.16 | 0.1729   | 0.6775          |
| G → C                   | 1                      | 0.67 | 0.1776   | 0.6735          | 0                          | 1    | 0.7311   | 0.3925          | 0                        | 0.25 | 0.2742   | 0.6006          |
| G → T                   | 1                      | 0.67 | 0.1776   | 0.6735          | 0                          | 1    | 0.7311   | 0.3925          | 1                        | 0.25 | 2.4361   | 0.1186          |
| T → G                   | 1                      | 0.74 | 0.1038   | 0.7473          | 0                          | 1    | 0.8048   | 0.3697          | 0                        | 0.27 | 0.3018   | 0.5828          |
| Ts/Tv                   | 0.6                    | 0.5  |          |                 | ND                         | 0.5  |          |                 | 0.5                      | 0.5  |          |                 |
| Deletions               | 0                      |      |          |                 | 0                          |      |          |                 | 1                        |      |          |                 |
| Insertions              | 0                      |      |          |                 | 0                          |      |          |                 | 0                        |      |          |                 |
| Recombination<br>events | 0                      |      |          |                 | 0                          |      |          |                 | 0                        |      |          |                 |

| DNA-R<br>Coding region  | A: FBNSV-[ET:Hol;1997] |      |          |                 | B: FBNSV-[ET:Hol;JKI-2000] |      |          |                 | C: FBNSV-[ET:Hol;ISV-T1] |      |          |                 |
|-------------------------|------------------------|------|----------|-----------------|----------------------------|------|----------|-----------------|--------------------------|------|----------|-----------------|
|                         | Obs.                   | Exp. | $\chi^2$ | <i>p</i> -value | Obs.                       | Exp. | $\chi^2$ | <i>p</i> -value | Obs.                     | Exp. | $\chi^2$ | <i>p</i> -value |
| Transitions<br>(Ts)     | 2                      | 2    | 0        | 1               | 6                          | 2    | 12       | 0.0005          | 1                        | 1    | 0        | 1               |
| A → G                   | 0                      | 0.64 | 0.7207   | 0.3959          | 1                          | 0.64 | 0.2214   | 0.6380          | 0                        | 0.32 | 0.3603   | 0.5483          |
| G → A                   | 1                      | 0.51 | 0.5133   | 0.4737          | 2                          | 0.51 | 4.7516   | 0.0293          | 0                        | 0.26 | 0.2789   | 0.5974          |
| C → T                   | 0                      | 0.31 | 0.3218   | 0.5705          | 1                          | 0.31 | 1.6195   | 0.2032          | 0                        | 0.16 | 0.1634   | 0.6860          |
| T → C                   | 1                      | 0.54 | 0.4285   | 0.5127          | 2                          | 0.54 | 4.3883   | 0.0362          | 1                        | 0.27 | 2.1941   | 0.1385          |
| Transversions<br>(Tv)   | 4                      | 4    | 0        | 1               | 0                          | 4    | 12       | 0.0005          | 2                        | 2    | 0        | 1               |
| A → C                   | 1                      | 0.64 | 0.2214   | 0.6380          | 0                          | 0.64 | 0.7207   | 0.3959          | 1                        | 0.32 | 1.6020   | 0.2056          |
| C → A                   | 0                      | 0.31 | 0.3218   | 0.5705          | 0                          | 0.31 | 0.3269   | 0.5675          | 0                        | 0.16 | 0.1634   | 0.6860          |
| A → T                   | 1                      | 0.64 | 0.2214   | 0.6380          | 0                          | 0.64 | 0.7207   | 0.3959          | 0                        | 0.32 | 0.3603   | 0.5483          |
| T → A                   | 0                      | 0.54 | 0.5944   | 0.4407          | 0                          | 0.54 | 0.5888   | 0.4429          | 0                        | 0.27 | 0.2944   | 0.5874          |
| C → G                   | 0                      | 0.31 | 0.3218   | 0.5705          | 0                          | 0.31 | 0.3269   | 0.5675          | 0                        | 0.16 | 0.1634   | 0.6860          |
| G → C                   | 0                      | 0.51 | 0.5579   | 0.4551          | 0                          | 0.51 | 0.5579   | 0.4551          | 0                        | 0.26 | 0.2789   | 0.5974          |
| G → T                   | 1                      | 0.51 | 0.5133   | 0.4737          | 0                          | 0.51 | 0.5579   | 0.4551          | 1                        | 0.26 | 2.3758   | 0.1232          |
| T → G                   | 1                      | 0.54 | 0.4285   | 0.5127          | 0                          | 0.54 | 0.5888   | 0.4429          | 0                        | 0.27 | 0.2944   | 0.5874          |
| Ts/Tv                   | 0.5                    | 0.5  |          |                 | ND                         | 0.5  |          |                 | 0.5                      | 0.5  |          |                 |
| Deletions               | 0                      |      |          |                 | 0                          |      |          |                 | 0                        |      |          |                 |
| Insertions              | 0                      |      |          |                 | 0                          |      |          |                 | 0                        |      |          |                 |
| Recombination<br>events | 0                      |      |          |                 | 0                          |      |          |                 | 0                        |      |          |                 |

| DNA-R<br>Non coding<br>region | A: FBNSV-[ET:Hol;1997] |      |          |                 | B: FBNSV-[ET:Hol;JKI-2000] |      |          |                 | C: FBNSV-[ET:Hol;ISV-T1] |      |          |                 |
|-------------------------------|------------------------|------|----------|-----------------|----------------------------|------|----------|-----------------|--------------------------|------|----------|-----------------|
|                               | Obs.                   | Exp. | $\chi^2$ | <i>p</i> -value | Obs.                       | Exp. | $\chi^2$ | <i>p</i> -value | Obs.                     | Exp. | $\chi^2$ | <i>p</i> -value |
| Transitions<br>(Ts)           | 1                      | 0.67 | 0.25     | 0.6171          | 2                          | 0.67 | 4        | 0.0455          | 0                        | 0    | ND       | ND              |
| A → G                         | 0                      | 0.17 | 0.1805   | 0.6710          | 1                          | 0.17 | 4.5862   | 0.0322          | 0                        | 0    | ND       | ND              |
| G → A                         | 0                      | 0.15 | 0.1642   | 0.6853          | 1                          | 0.15 | 5.1316   | 0.0235          | 0                        | 0    | ND       | ND              |
| C → T                         | 1                      | 0.14 | 5.5543   | 0.0184          | 0                          | 0.14 | 0.1535   | 0.6952          | 0                        | 0    | ND       | ND              |
| T → C                         | 0                      | 0.21 | 0.2307   | 0.6310          | 0                          | 0.21 | 0.2307   | 0.6310          | 0                        | 0    | ND       | ND              |
| Transversions<br>(Tv)         | 1                      | 1.33 | 0.25     | 0.6171          | 0                          | 1.33 | 4        | 0.0455          | 0                        | 0    | ND       | ND              |
| A → C                         | 0                      | 0.17 | 0.1805   | 0.6710          | 0                          | 0.17 | 0.1805   | 0.6710          | 0                        | 0    | ND       | ND              |
| C → A                         | 0                      | 0.14 | 0.1535   | 0.6952          | 0                          | 0.14 | 0.1535   | 0.6952          | 0                        | 0    | ND       | ND              |
| A → T                         | 0                      | 0.17 | 0.1805   | 0.6710          | 0                          | 0.17 | 0.1805   | 0.6710          | 0                        | 0    | ND       | ND              |
| T → A                         | 0                      | 0.21 | 0.2307   | 0.6310          | 0                          | 0.21 | 0.2307   | 0.6310          | 0                        | 0    | ND       | ND              |
| C → G                         | 0                      | 0.14 | 0.1535   | 0.6952          | 0                          | 0.14 | 0.1535   | 0.6952          | 0                        | 0    | ND       | ND              |
| G → C                         | 1                      | 0.15 | 5.1316   | 0.0235          | 0                          | 0.15 | 0.1642   | 0.6853          | 0                        | 0    | ND       | ND              |
| G → T                         | 0                      | 0.15 | 0.1642   | 0.6853          | 0                          | 0.15 | 0.1642   | 0.6853          | 0                        | 0    | ND       | ND              |
| T → G                         | 0                      | 0.21 | 0.2307   | 0.6310          | 0                          | 0.21 | 0.2307   | 0.6310          | 0                        | 0    | ND       | ND              |
| Ts/Tv                         | 1                      | 0.5  |          |                 | ND                         | 0.5  |          |                 | ND                       | ND   |          |                 |
| Deletions                     | 0                      |      |          |                 | 0                          |      |          |                 | 1                        |      |          |                 |
| Insertions                    | 0                      |      |          |                 | 0                          |      |          |                 | 0                        |      |          |                 |
| Recombination<br>events       | 0                      |      |          |                 | 0                          |      |          |                 | 0                        |      |          |                 |

| DNA-S<br>Genome      | A: FBNSV-[ET:Hol;1997] |      |          |                 | B: FBNSV-[ET:Hol;JKI-2000] |      |          |                 | C: FBNSV-[ET:Hol;ISV-T1] |      |          |                 |
|----------------------|------------------------|------|----------|-----------------|----------------------------|------|----------|-----------------|--------------------------|------|----------|-----------------|
|                      | Obs.                   | Exp. | $\chi^2$ | <i>p</i> -value | Obs.                       | Exp. | $\chi^2$ | <i>p</i> -value | Obs.                     | Exp. | $\chi^2$ | <i>p</i> -value |
| Transitions (Ts)     | 6                      | 3.33 | 3.2      | 0.0736          | 6                          | 4    | 1.5      | 0.2207          | 0                        | 2    | 2.5      | 0.1138          |
| A → G                | 0                      | 0.95 | 1.0469   | 0.3062          | 0                          | 1.14 | 1.2611   | 0.2614          | 0                        | 0    | 0.5255   | 0.4685          |
| G → A                | 2                      | 0.75 | 2.2779   | 0.1312          | 0                          | 0.89 | 0.9627   | 0.3265          | 0                        | 0    | 0.4011   | 0.5265          |
| C → T                | 3                      | 0.55 | 11.5197  | 0.0007          | 0                          | 0.67 | 0.7132   | 0.3984          | 0                        | 0    | 0.2972   | 0.5857          |
| T → C                | 1                      | 1.09 | 0.0081   | 0.9283          | 6                          | 1.29 | 19.1748  | 1.19E-05        | 0                        | 1    | 0.6045   | 0.4368          |
| Transversions (Tv)   | 4                      | 6.67 | 3.2      | 0.0736          | 6                          | 8    | 1.5      | 0.2207          | 5                        | 3    | 2.5      | 0.1138          |
| A → C                | 0                      | 0.95 | 1.0469   | 0.3062          | 0                          | 1.14 | 1.2611   | 0.2614          | 0                        | 0    | 0.5255   | 0.4685          |
| C → A                | 0                      | 0.55 | 0.5831   | 0.4451          | 0                          | 0.67 | 0.7132   | 0.3984          | 0                        | 0    | 0.2972   | 0.5857          |
| A → T                | 0                      | 0.95 | 1.0469   | 0.3062          | 2                          | 1.14 | 0.7142   | 0.3981          | 1                        | 0    | 0.6394   | 0.4239          |
| T → A                | 2                      | 1.09 | 0.8561   | 0.3548          | 0                          | 1.29 | 1.4509   | 0.2284          | 1                        | 1    | 0.4410   | 0.5066          |
| C → G                | 1                      | 0.55 | 0.3872   | 0.5338          | 1                          | 0.67 | 0.1681   | 0.6818          | 0                        | 0    | 0.2972   | 0.5857          |
| G → C                | 0                      | 0.75 | 0.8061   | 0.3693          | 0                          | 0.89 | 0.9627   | 0.3265          | 0                        | 0    | 0.4011   | 0.5265          |
| G → T                | 1                      | 0.75 | 0.0935   | 0.7598          | 3                          | 0.89 | 5.3903   | 0.0202          | 2                        | 0    | 7.7164   | 0.0055          |
| T → G                | 0                      | 1.09 | 1.2217   | 0.2690          | 0                          | 1.29 | 1.4509   | 0.2284          | 1                        | 1    | 0.4410   | 0.5066          |
| Ts/Tv                | 1.5                    | 0.5  |          |                 | 1                          | 0.5  |          |                 | 0                        | 0.5  |          |                 |
| Deletions            | 0                      |      |          |                 | 0                          |      |          |                 | 0                        |      |          |                 |
| Insertions           | 1                      |      |          |                 | 0                          |      |          |                 | 0                        |      |          |                 |
| Recombination events | 1                      |      |          |                 | 1                          |      |          |                 | 0                        |      |          |                 |

| DNA-S<br>Coding region | A: FBNSV-[ET:Hol;1997] |      |          |                 | B: FBNSV-[ET:Hol;JKI-2000] |      |          |                 | C: FBNSV-[ET:Hol;ISV-T1] |      |          |                 |
|------------------------|------------------------|------|----------|-----------------|----------------------------|------|----------|-----------------|--------------------------|------|----------|-----------------|
|                        | Obs.                   | Exp. | $\chi^2$ | <i>p</i> -value | Obs.                       | Exp. | $\chi^2$ | <i>p</i> -value | Obs.                     | Exp. | $\chi^2$ | <i>p</i> -value |
| Transitions (Ts)       | 4                      | 2.67 | 1        | 0.3173          | 5                          | 2    | 6.75     | 0.0094          | 0                        | 1    | 1.5      | 0.2207          |
| A → G                  | 0                      | 0.79 | 0.8711   | 0.3506          | 0                          | 0.59 | 0.6580   | 0.4173          | 0                        | 0.30 | 0.3290   | 0.5662          |
| G → A                  | 2                      | 0.68 | 2.7834   | 0.0952          | 0                          | 0.51 | 0.5548   | 0.4564          | 0                        | 0.25 | 0.2774   | 0.5984          |
| C → T                  | 2                      | 0.40 | 6.7891   | 0.0092          | 0                          | 0.31 | 0.3269   | 0.5675          | 0                        | 0.16 | 0.1634   | 0.6860          |
| T → C                  | 0                      | 0.80 | 0.8902   | 0.3454          | 5                          | 0.59 | 36.6152  | 1.44E-09        | 0                        | 0.29 | 0.3267   | 0.5676          |
| Transversions (Tv)     | 4                      | 5.33 | 1        | 0.3173          | 1                          | 4    | 6.75     | 0.0094          | 3                        | 2    | 1.5      | 0.2207          |
| A → C                  | 0                      | 0.79 | 0.8711   | 0.3506          | 0                          | 0.59 | 0.6580   | 0.4173          | 0                        | 0.30 | 0.3290   | 0.5662          |
| C → A                  | 0                      | 0.40 | 0.4187   | 0.5176          | 0                          | 0.31 | 0.3269   | 0.5675          | 0                        | 0.16 | 0.1634   | 0.6860          |
| A → T                  | 0                      | 0.79 | 0.8711   | 0.3506          | 1                          | 0.59 | 0.3100   | 0.5777          | 1                        | 0.30 | 1.8522   | 0.1735          |
| T → A                  | 2                      | 0.80 | 1.9941   | 0.1579          | 0                          | 0.59 | 0.6534   | 0.4189          | 0                        | 0.29 | 0.3267   | 0.5676          |
| C → G                  | 1                      | 0.40 | 0.9590   | 0.3274          | 0                          | 0.31 | 0.3269   | 0.5675          | 0                        | 0.16 | 0.1634   | 0.6860          |
| G → C                  | 0                      | 0.68 | 0.7457   | 0.3878          | 0                          | 0.51 | 0.5548   | 0.4564          | 0                        | 0.25 | 0.2774   | 0.5984          |
| G → T                  | 1                      | 0.68 | 0.1619   | 0.6874          | 0                          | 0.51 | 0.5548   | 0.4564          | 2                        | 0.25 | 13.1184  | 0.0003          |
| T → G                  | 0                      | 0.80 | 0.8902   | 0.3454          | 0                          | 0.59 | 0.6534   | 0.4189          | 0                        | 0.29 | 0.3267   | 0.5676          |
| Ts/Tv                  | 1                      | 0.5  |          |                 | 5                          | 0.5  |          |                 | 0                        | 0.5  |          |                 |
| Deletions              | 0                      |      |          |                 | 0                          |      |          |                 | 0                        |      |          |                 |
| Insertions             | 0                      |      |          |                 | 0                          |      |          |                 | 0                        |      |          |                 |
| Recombination events   | 0                      |      |          |                 | 0                          |      |          |                 | 0                        |      |          |                 |

| DNA-S<br>Non coding region | A: FBNSV-[ET:Hol;1997] |      |          |                 | B: FBNSV-[ET:Hol;JKI-2000] |      |          |                 | C: FBNSV-[ET:Hol;ISV-T1] |      |          |                 |
|----------------------------|------------------------|------|----------|-----------------|----------------------------|------|----------|-----------------|--------------------------|------|----------|-----------------|
|                            | Obs.                   | Exp. | $\chi^2$ | <i>p</i> -value | Obs.                       | Exp. | $\chi^2$ | <i>p</i> -value | Obs.                     | Exp. | $\chi^2$ | <i>p</i> -value |
| Transitions (Ts)           | 2                      | 0.67 | 4        | 0.0455          | 1                          | 2    | 0.75     | 0.3865          | 0                        | 0.67 | 1        | 0.3173          |
| A → G                      | 0                      | 0.18 | 0.2003   | 0.6545          | 0                          | 0.55 | 0.6009   | 0.4382          | 0                        | 0.18 | 0.2003   | 0.6545          |
| G → A                      | 0                      | 0.13 | 0.1345   | 0.7138          | 0                          | 0.38 | 0.4036   | 0.5252          | 0                        | 0.13 | 0.1345   | 0.7138          |
| C → T                      | 1                      | 0.12 | 6.7381   | 0.0094          | 0                          | 0.37 | 0.3893   | 0.5327          | 0                        | 0.12 | 0.1298   | 0.7187          |
| T → C                      | 1                      | 0.24 | 2.7925   | 0.0947          | 1                          | 0.71 | 0.1343   | 0.7140          | 0                        | 0.24 | 0.2684   | 0.6044          |
| Transversions (Tv)         | 0                      | 1.33 | 4        | 0.0455          | 5                          | 4    | 0.75     | 0.3865          | 2                        | 1.33 | 1        | 0.3173          |
| A → C                      | 0                      | 0.18 | 0.2003   | 0.6545          | 0                          | 0.55 | 0.6009   | 0.4382          | 0                        | 0.18 | 0.2003   | 0.6545          |
| C → A                      | 0                      | 0.12 | 0.1298   | 0.7187          | 0                          | 0.37 | 0.3893   | 0.5327          | 0                        | 0.12 | 0.1298   | 0.7187          |
| A → T                      | 0                      | 0.18 | 0.2003   | 0.6545          | 1                          | 0.55 | 0.4148   | 0.5195          | 0                        | 0.18 | 0.2003   | 0.6545          |
| T → A                      | 0                      | 0.24 | 0.2684   | 0.6044          | 0                          | 0.71 | 0.8053   | 0.3695          | 1                        | 0.24 | 2.7925   | 0.0947          |
| C → G                      | 0                      | 0.12 | 0.1298   | 0.7187          | 1                          | 0.37 | 1.1723   | 0.2789          | 0                        | 0.12 | 0.1298   | 0.7187          |
| G → C                      | 0                      | 0.13 | 0.1345   | 0.7138          | 0                          | 0.38 | 0.4036   | 0.5252          | 0                        | 0.13 | 0.1345   | 0.7138          |
| G → T                      | 0                      | 0.13 | 0.1345   | 0.7138          | 3                          | 0.38 | 19.3978  | 1.06E-05        | 0                        | 0.13 | 0.1345   | 0.7138          |
| T → G                      | 0                      | 0.24 | 0.2684   | 0.6044          | 0                          | 0.71 | 0.8053   | 0.3695          | 1                        | 0.24 | 2.7925   | 0.0947          |
| Ts/Tv                      | ND                     | 0.5  |          |                 | 0.2                        | 0.5  |          |                 | 0                        | 0.5  |          |                 |
| Deletions                  | 0                      |      |          |                 | 0                          |      |          |                 | 0                        |      |          |                 |
| Insertions                 | 1                      |      |          |                 | 0                          |      |          |                 | 0                        |      |          |                 |
| Recombination events       | 1                      |      |          |                 | 1                          |      |          |                 | 0                        |      |          |                 |

| DNA-C<br>Genome       | A: FBNSV-[ET:Hol;1997] |       |                   |                    | B: FBNSV-[ET:Hol;JKI-2000] |      |          |                 | C: FBNSV-[ET:Hol;ISV-T1] |      |          |                 |
|-----------------------|------------------------|-------|-------------------|--------------------|----------------------------|------|----------|-----------------|--------------------------|------|----------|-----------------|
|                       | Obs.                   | Exp.  | $\chi^2$          | <i>p</i> -value    | Obs.                       | Exp. | $\chi^2$ | <i>p</i> -value | Obs.                     | Exp. | $\chi^2$ | <i>p</i> -value |
| Transitions<br>(Ts)   | 8                      | 6.33  | 0.7               | 0.4173             | 0                          | 1.67 | 2.5      | 0.1138          | 2                        | 1    | 1.5      | 0.2207          |
| A → G                 | (+1)                   | 1.92  | 2.1409 to 0.4938  | 0.1434 to 0.4822   | 0                          | 0.51 | 0.5654   | 0.4521          | 0                        | 0.30 | 0.3393   | 0.5603          |
| G → A                 | (+1)                   | 1.35  | 1.4543 to 0.0981  | 0.2278 to 0.7541   | 0                          | 0.36 | 0.3827   | 0.5362          | 0                        | 0.21 | 0.2296   | 0.6318          |
| C → T                 | 4 (+1)                 | 1.02  | 9.2051 to 16.4186 | 0.0024 to 5.08E-05 | 0                          | 0.27 | 0.2836   | 0.5944          | 0                        | 0.16 | 0.1701   | 0.6800          |
| T → C                 | 2 (+1)                 | 2.04  | 0.0008 to 0.5078  | 0.9771 to 0.4761   | 0                          | 0.53 | 0.5989   | 0.4390          | 2                        | 0.32 | 9.8382   | 0.0017          |
| Transversions<br>(Tv) | 11                     | 12.67 | 0.7               | 0.4173             | 5                          | 3.33 | 2.5      | 0.1138          | 1                        | 2    | 1.5      | 0.2207          |
| A → C                 | 1 (+1)                 | 1.92  | 0.4938 to 0.0033  | 0.4822 to 0.9540   | 2                          | 0.51 | 4.8776   | 0.0272          | 1                        | 0.30 | 1.7650   | 0.1840          |
| C → A                 | 4 (+1)                 | 1.02  | 9.2051 to 16.4186 | 0.0024 to 5.08E-05 | 0                          | 0.27 | 0.2836   | 0.5944          | 0                        | 0.16 | 0.1701   | 0.6800          |
| A → T                 | 1                      | 1.92  | 0.4938            | 0.4822             | 1                          | 0.51 | 0.5304   | 0.4664          | 0                        | 0.30 | 0.3393   | 0.5603          |
| T → A                 | 1                      | 2.04  | 0.5928            | 0.4413             | 1                          | 0.53 | 0.4530   | 0.5009          | 0                        | 0.32 | 0.3593   | 0.5489          |
| C → G                 | 0                      | 1.02  | 1.0775            | 0.2993             | 0                          | 0.27 | 0.2836   | 0.5944          | 0                        | 0.16 | 0.1701   | 0.6800          |
| G → C                 | 1                      | 1.35  | 0.0981            | 0.7541             | 0                          | 0.36 | 0.3827   | 0.5362          | 0                        | 0.21 | 0.2296   | 0.6318          |
| G → T                 | (+2)                   | 1.35  | 1.4543 to 0.3358  | 0.2278 to 0.5623   | 0                          | 0.36 | 0.3827   | 0.5362          | 0                        | 0.21 | 0.2296   | 0.6318          |
| T → G                 | (+2)                   | 2.04  | 2.2837 to 0.0008  | 0.1307 to 0.9771   | 1                          | 0.53 | 0.4530   | 0.5009          | 0                        | 0.32 | 0.3593   | 0.5489          |
| Ts/Tv                 | 0.7                    | 0.5   |                   |                    | 0                          | 0.5  |          |                 | 2                        | 0.5  |          |                 |
| Deletions             | 0                      |       |                   |                    | 0                          |      |          |                 | 0                        |      |          |                 |
| Insertions            | 0                      |       |                   |                    | 0                          |      |          |                 | 0                        |      |          |                 |
| Recombination events  | 1                      |       |                   |                    | 0                          |      |          |                 | 0                        |      |          |                 |

| DNA-C<br>Coding region | A: FBNSV-[ET:Hol;1997] |      |                    |                    | B: FBNSV-[ET:Hol;JKI-2000] |      |          |                 | C: FBNSV-[ET:Hol;ISV-T1] |      |          |                 |
|------------------------|------------------------|------|--------------------|--------------------|----------------------------|------|----------|-----------------|--------------------------|------|----------|-----------------|
|                        | Obs.                   | Exp. | $\chi^2$           | <i>p</i> -value    | Obs.                       | Exp. | $\chi^2$ | <i>p</i> -value | Obs.                     | Exp. | $\chi^2$ | <i>p</i> -value |
| Transitions<br>(Ts)    | 3                      | 4    | 0.3750             | 0.5403             | 0                          | 0.67 | 1        | 0.3173          | 0                        | 0    | ND       | ND              |
| A → G                  | 0                      | 1.38 | 1.5603             | 0.2116             | 0                          | 0.23 | 0.2601   | 0.6101          | 0                        | 0    | ND       | ND              |
| G → A                  | 0                      | 0.88 | 0.9445             | 0.3311             | 0                          | 0.15 | 0.1574   | 0.6915          | 0                        | 0    | ND       | ND              |
| C → T                  | 2 (+1)                 | 0.50 | 4.6232 to 12.8753  | 0.0315 to 0.0003   | 0                          | 0.08 | 0.0878   | 0.7670          | 0                        | 0    | ND       | ND              |
| T → C                  | (+1)                   | 1.24 | 1.3814 to 0.0513   | 0.2399 to 0.8208   | 0                          | 0.21 | 0.2302   | 0.6313          | 0                        | 0    | ND       | ND              |
| Transversions<br>(Tv)  | 9                      | 8    | 0.3750             | 0.5403             | 2                          | 1.33 | 1        | 0.3173          | 0                        | 0    | ND       | ND              |
| A → C                  | 1 (+1)                 | 1.38 | 0.1187 to 0.3138   | 0.7305 to 0.5754   | 2                          | 0.23 | 15.3812  | 8.79E-05        | 0                        | 0    | ND       | ND              |
| C → A                  | 3 (+1)                 | 0.50 | 12.8753 to 25.2633 | 0.0003 to 5.00E-07 | 0                          | 0.08 | 0.0878   | 0.7670          | 0                        | 0    | ND       | ND              |
| A → T                  | 1                      | 1.38 | 0.1187             | 0.7305             | 0                          | 0.23 | 0.2601   | 0.6101          | 0                        | 0    | ND       | ND              |
| T → A                  | 0                      | 1.24 | 1.3814             | 0.2399             | 0                          | 0.21 | 0.2302   | 0.6313          | 0                        | 0    | ND       | ND              |
| C → G                  | 0                      | 0.50 | 0.5270             | 0.4679             | 0                          | 0.08 | 0.0878   | 0.7670          | 0                        | 0    | ND       | ND              |
| G → C                  | 1                      | 0.88 | 0.0191             | 0.8902             | 0                          | 0.15 | 0.1574   | 0.6915          | 0                        | 0    | ND       | ND              |
| G → T                  | (+2)                   | 0.88 | 0.9445 to 1.5575   | 0.3311 to 0.2120   | 0                          | 0.15 | 0.1574   | 0.6915          | 0                        | 0    | ND       | ND              |
| T → G                  | (+2)                   | 1.24 | 1.3814 to 0.5216   | 0.2399 to 0.4702   | 0                          | 0.21 | 0.2302   | 0.6313          | 0                        | 0    | ND       | ND              |
| Ts/Tv                  | 0.3                    | 0.5  |                    |                    | 0                          | 0.5  |          |                 | ND                       | ND   |          |                 |
| Deletions              | 0                      |      |                    |                    | 0                          |      |          |                 | 0                        |      |          |                 |
| Insertions             | 0                      |      |                    |                    | 0                          |      |          |                 | 0                        |      |          |                 |
| Recombination events   | 0                      |      |                    |                    | 0                          |      |          |                 | 0                        |      |          |                 |

| DNA-C<br>Non coding region | A: FBNSV-[ET:Hol;1997] |      |                  |                  | B: FBNSV-[ET:Hol;JKI-2000] |        |          |                 | C: FBNSV-[ET:Hol;ISV-T1] |      |          |                 |
|----------------------------|------------------------|------|------------------|------------------|----------------------------|--------|----------|-----------------|--------------------------|------|----------|-----------------|
|                            | Obs.                   | Exp. | $\chi^2$         | <i>p</i> -value  | Obs.                       | Exp.   | $\chi^2$ | <i>p</i> -value | Obs.                     | Exp. | $\chi^2$ | <i>p</i> -value |
| Transitions<br>(Ts)        | 5                      | 2.33 | 4.5714           | 0.0325           | 0                          | 0.9999 | 1.5002   | 0.2206          | 2                        | 1    | 1.5002   | 0.2206          |
| A → G                      | (+1)                   | 0.61 | 0.6665 to 0.2758 | 0.4143 to 0.5995 | 0                          | 0.26   | 0.2881   | 0.5914          | 0                        | 0.26 | 0.2881   | 0.5914          |
| G → A                      | (+1)                   | 0.48 | 0.5199 to 0.5912 | 0.4709 to 0.4420 | 0                          | 0.21   | 0.2228   | 0.6369          | 0                        | 0.21 | 0.2228   | 0.6369          |
| C → T                      | 2                      | 0.46 | 5.5201           | 0.0188           | 0                          | 0.20   | 0.2110   | 0.6460          | 0                        | 0.20 | 0.2110   | 0.6460          |
| T → C                      | 2                      | 0.78 | 2.1418           | 0.1433           | 0                          | 0.33   | 0.3742   | 0.5407          | 2                        | 0.33 | 9.4011   | 0.0022          |
| Transversions<br>(Tv)      | 2                      | 4.67 | 4.5714           | 0.0325           | 3                          | 1.9998 | 1.5002   | 0.2206          | 1                        | 2    | 1.5002   | 0.2206          |
| A → C                      | 0                      | 0.61 | 0.6665           | 0.4143           | 0                          | 0.26   | 0.2881   | 0.5914          | 1                        | 0.26 | 2.2664   | 0.1322          |
| C → A                      | 1                      | 0.46 | 0.6789           | 0.4100           | 0                          | 0.20   | 0.2110   | 0.6460          | 0                        | 0.20 | 0.2110   | 0.6460          |
| A → T                      | 0                      | 0.61 | 0.6665           | 0.4143           | 1                          | 0.26   | 2.2664   | 0.1322          | 0                        | 0.26 | 0.2881   | 0.5914          |
| T → A                      | 1                      | 0.78 | 0.0691           | 0.7926           | 1                          | 0.33   | 1.5061   | 0.2197          | 0                        | 0.33 | 0.3742   | 0.5407          |
| C → G                      | 0                      | 0.46 | 0.4922           | 0.4829           | 0                          | 0.20   | 0.2110   | 0.6460          | 0                        | 0.20 | 0.2110   | 0.6460          |
| G → C                      | 0                      | 0.48 | 0.5199           | 0.4709           | 0                          | 0.21   | 0.2228   | 0.6369          | 0                        | 0.21 | 0.2228   | 0.6369          |
| G → T                      | 0                      | 0.48 | 0.5199           | 0.4709           | 0                          | 0.21   | 0.2228   | 0.6369          | 0                        | 0.21 | 0.2228   | 0.6369          |
| T → G                      | 0                      | 0.78 | 0.8790           | 0.3485           | 1                          | 0.33   | 1.5061   | 0.2197          | 0                        | 0.33 | 0.3742   | 0.5407          |
| Ts/Tv                      | 2.5                    | 0.5  |                  |                  | 0                          | 0.5    |          |                 | 2                        | 0.5  |          |                 |
| Deletions                  | 0                      |      |                  |                  | 0                          |        |          |                 | 0                        |      |          |                 |
| Insertions                 | 0                      |      |                  |                  | 0                          |        |          |                 | 0                        |      |          |                 |
| Recombination events       | 1                      |      |                  |                  | 0                          |        |          |                 | 0                        |      |          |                 |



| DNA-N<br>Genome       | A: FBNSV-[ET:Hol;1997] |       |                   |                    | B: FBNSV-[ET:Hol;JKI-2000] |       |          |                 | C: FBNSV-[ET:Hol;ISV-T1] |      |          |                 |
|-----------------------|------------------------|-------|-------------------|--------------------|----------------------------|-------|----------|-----------------|--------------------------|------|----------|-----------------|
|                       | Obs.                   | Exp.  | $\chi^2$          | <i>p</i> -value    | Obs.                       | Exp.  | $\chi^2$ | <i>p</i> -value | Obs.                     | Exp. | $\chi^2$ | <i>p</i> -value |
| Transitions<br>(Ts)   | 25                     | 10.67 | 28.8906           | 7.66E-08           | 12                         | 5.33  | 12.5     | 0.0004          | 3                        | 1.33 | 3.1250   | 0.0771          |
| A → G                 | 3 (+4)                 | 2.94  | 0.0014 to 6.1805  | 0.9701 to 0.0129   | 2                          | 1.45  | 0.2277   | 0.6332          | 1                        | 0.36 | 1.2298   | 0.2674          |
| G → A                 | 6 (+4)                 | 2.34  | 6.1747 to 27.0486 | 0.0130 to 1.98E-07 | 1                          | 1.19  | 0.0312   | 0.8598          | 1                        | 0.30 | 1.8053   | 0.1791          |
| C → T                 | 2 (+3)                 | 1.85  | 0.0128 to 5.6883  | 0.9100 to 0.0171   | 1                          | 0.93  | 0.0048   | 0.9447          | 0                        | 0.23 | 0.2482   | 0.6183          |
| T → C                 | 7 (+3)                 | 3.54  | 3.8117 to 13.2766 | 0.0509 to 0.0003   | 8                          | 1.76  | 24.8255  | 6.28E-07        | 1                        | 0.44 | 0.7990   | 0.3714          |
| Transversions<br>(Tv) | 7                      | 21.33 | 28.8906           | 7.66E-08           | 4                          | 10.67 | 12.5     | 0.0004          | 1                        | 2.67 | 3.1250   | 0.0771          |
| A → C                 | 1                      | 2.94  | 1.4083            | 0.2353             | 1                          | 1.45  | 0.1546   | 0.6942          | 0                        | 0.36 | 0.3991   | 0.5275          |
| C → A                 | 1                      | 1.85  | 0.4150            | 0.5194             | 0                          | 0.93  | 0.9930   | 0.3190          | 0                        | 0.23 | 0.2482   | 0.6183          |
| A → T                 | 1                      | 2.94  | 1.4083            | 0.2353             | 1                          | 1.45  | 0.1546   | 0.6942          | 0                        | 0.36 | 0.3991   | 0.5275          |
| T → A                 | 0                      | 3.54  | 3.9766            | 0.0461             | 0                          | 1.76  | 1.9795   | 0.1594          | 0                        | 0.44 | 0.4949   | 0.4818          |
| C → G                 | 0                      | 1.85  | 1.9643            | 0.1611             | 0                          | 0.93  | 0.9930   | 0.3190          | 0                        | 0.23 | 0.2482   | 0.6183          |
| G → C                 | 0                      | 2.34  | 2.5249            | 0.1121             | 0                          | 1.19  | 1.2799   | 0.2579          | 0                        | 0.30 | 0.3200   | 0.5716          |
| G → T                 | 1 (+1)                 | 2.34  | 0.8281 to 0.0534  | 0.3628 to 0.8173   | 1                          | 1.19  | 0.0312   | 0.8598          | 1                        | 0.30 | 1.8053   | 0.1791          |
| T → G                 | 2 (+1)                 | 3.54  | 0.7510 to 0.0917  | 0.3862 to 0.7620   | 1                          | 1.76  | 0.3700   | 0.5430          | 0                        | 0.44 | 0.4949   | 0.4818          |
| Ts/Tv                 | 3.6                    | 0.5   |                   |                    | 3                          | 0.5   |          |                 | 3                        | 0.5  |          |                 |
| Deletions             | 0                      |       |                   |                    | 0                          |       |          |                 | 0                        |      |          |                 |
| Insertions            | 0                      |       |                   |                    | 1                          |       |          |                 | 0                        |      |          |                 |
| Recombination events  | 0                      |       |                   |                    | 1                          |       |          |                 | 0                        |      |          |                 |

| DNA-N<br>Coding region | A: FBNSV-[ET:Hol;1997] |       |                   |                    | B: FBNSV-[ET:Hol;JKI-2000] |      |          |                 | C: FBNSV-[ET:Hol;ISV-T1] |      |          |                 |
|------------------------|------------------------|-------|-------------------|--------------------|----------------------------|------|----------|-----------------|--------------------------|------|----------|-----------------|
|                        | Obs.                   | Exp.  | $\chi^2$          | <i>p</i> -value    | Obs.                       | Exp. | $\chi^2$ | <i>p</i> -value | Obs.                     | Exp. | $\chi^2$ | <i>p</i> -value |
| Transitions<br>(Ts)    | 15                     | 5.33  | 26.2813           | 2.95E-07           | 6                          | 3    | 4.5      | 0.0339          | 3                        | 1.33 | 3.1250   | 0.0771          |
| A → G                  | 1 (+3)                 | 1.58  | 0.2364 to 4.1112  | 2.95E-07 to 0.0426 | 2                          | 0.88 | 1.5991   | 0.2060          | 1                        | 0.39 | 1.0619   | 0.3028          |
| G → A                  | 2 (+3)                 | 1.27  | 0.4611 to 11.9495 | 0.6268 to 0.0005   | 0                          | 0.72 | 0.7815   | 0.3767          | 1                        | 0.32 | 1.5743   | 0.2096          |
| C → T                  | 1 (+3)                 | 0.79  | 0.0588 to 13.7240 | 0.4971 to 0.0002   | 1                          | 0.44 | 0.7311   | 0.3925          | 0                        | 0.20 | 0.2077   | 0.6486          |
| T → C                  | 5 (+3)                 | 1.70  | 7.1954 to 26.1984 | 0.8084 to 3.08E-07 | 3                          | 0.96 | 4.8443   | 0.0277          | 1                        | 0.43 | 0.8605   | 0.3536          |
| Transversions<br>(Tv)  | 1                      | 10.67 | 26.2813           | 2.95E-07           | 3                          | 6    | 4.5      | 0.0339          | 1                        | 2.67 | 3.1250   | 0.0771          |
| A → C                  | 0                      | 1.58  | 1.7534            | 0.1854             | 1                          | 0.88 | 0.0195   | 0.8888          | 0                        | 0.39 | 0.4312   | 0.5114          |
| C → A                  | 0                      | 0.79  | 0.8309            | 0.3620             | 0                          | 0.44 | 0.4674   | 0.4942          | 0                        | 0.20 | 0.2077   | 0.6486          |
| A → T                  | 0                      | 1.58  | 1.7534            | 0.1854             | 1                          | 0.88 | 0.0195   | 0.8888          | 0                        | 0.39 | 0.4312   | 0.5114          |
| T → A                  | 0                      | 1.70  | 1.8978            | 0.1683             | 0                          | 0.96 | 1.0758   | 0.2996          | 0                        | 0.43 | 0.4781   | 0.4893          |
| C → G                  | 0                      | 0.79  | 0.8309            | 0.3620             | 0                          | 0.44 | 0.4674   | 0.4942          | 0                        | 0.20 | 0.2077   | 0.6486          |
| G → C                  | 0                      | 1.27  | 1.3756            | 0.2409             | 0                          | 0.72 | 0.7815   | 0.3767          | 0                        | 0.32 | 0.3474   | 0.5556          |
| G → T                  | 0                      | 1.27  | 1.3756            | 0.2409             | 1                          | 0.72 | 0.1193   | 0.7298          | 1                        | 0.32 | 1.5743   | 0.2096          |
| T → G                  | 1                      | 1.70  | 0.3199            | 0.5717             | 0                          | 0.96 | 1.0758   | 0.2996          | 0                        | 0.43 | 0.4781   | 0.4893          |
| Ts/Tv                  | 15                     | 0.5   |                   |                    | 2                          | 0.5  |          |                 | 3                        | 0.5  |          |                 |
| Deletions              | 0                      |       |                   |                    | 0                          |      |          |                 | 0                        |      |          |                 |
| Insertions             | 0                      |       |                   |                    | 0                          |      |          |                 | 0                        |      |          |                 |
| Recombination events   | 0                      |       |                   |                    | 0                          |      |          |                 | 0                        |      |          |                 |

| DNA-N<br>Non coding region | A: FBNSV-[ET:Hol;1997] |       |                   |                    | B: FBNSV-[ET:Hol;JKI-2000] |      |          |                 | C: FBNSV-[ET:Hol;ISV-T1] |      |          |                 |
|----------------------------|------------------------|-------|-------------------|--------------------|----------------------------|------|----------|-----------------|--------------------------|------|----------|-----------------|
|                            | Obs.                   | Exp.  | $\chi^2$          | <i>p</i> -value    | Obs.                       | Exp. | $\chi^2$ | <i>p</i> -value | Obs.                     | Exp. | $\chi^2$ | <i>p</i> -value |
| Transitions<br>(Ts)        | 10                     | 5.33  | 6.1244            | 0.0133             | 6                          | 2.33 | 8.6429   | 0.0033          | 0                        | 0    | ND       | ND              |
| A → G                      | 2 (+1)                 | 1.37  | 0.3149 to 2.1144  | 0.5747 to 0.1459   | 0                          | 0.59 | 0.6497   | 0.4202          | 0                        | 0    | ND       | ND              |
| G → A                      | 4 (+1)                 | 1.09  | 8.3975 to 15.1479 | 0.0038 to 9.94E-05 | 1                          | 0.48 | 0.5952   | 0.4404          | 0                        | 0    | ND       | ND              |
| C → T                      | 1                      | 1.04  | 0.0020            | 0.9643             | 0                          | 0.46 | 0.4979   | 0.4804          | 0                        | 0    | ND       | ND              |
| T → C                      | 2                      | 1.83  | 0.0173            | 0.8953             | 5                          | 0.79 | 25.2405  | 5.06E-07        | 0                        | 0    | ND       | ND              |
| Transversions<br>(Tv)      | 6                      | 10.67 | 6.1244            | 0.0133             | 1                          | 4.67 | 8.6429   | 0.0033          | 0                        | 0    | ND       | ND              |
| A → C                      | 1                      | 1.37  | 0.1101            | 0.7400             | 0                          | 0.59 | 0.6497   | 0.4202          | 0                        | 0    | ND       | ND              |
| C → A                      | 1                      | 1.04  | 0.0020            | 0.9643             | 0                          | 0.46 | 0.4979   | 0.4804          | 0                        | 0    | ND       | ND              |
| A → T                      | 1                      | 1.37  | 0.1101            | 0.7400             | 0                          | 0.59 | 0.6497   | 0.4202          | 0                        | 0    | ND       | ND              |
| T → A                      | 0                      | 1.83  | 2.0691            | 0.1503             | 0                          | 0.79 | 0.8921   | 0.3449          | 0                        | 0    | ND       | ND              |
| C → G                      | 0                      | 1.04  | 1.1170            | 0.2906             | 0                          | 0.46 | 0.4979   | 0.4804          | 0                        | 0    | ND       | ND              |
| G → C                      | 0                      | 1.09  | 1.1641            | 0.2806             | 0                          | 0.48 | 0.5185   | 0.4715          | 0                        | 0    | ND       | ND              |
| G → T                      | 1 (+1)                 | 1.09  | 0.0072 to 0.8271  | 0.9325 to 0.3631   | 0                          | 0.48 | 0.5185   | 0.4715          | 0                        | 0    | ND       | ND              |
| T → G                      | 1 (+1)                 | 1.83  | 0.4270 to 0.0173  | 0.5135 to 0.8953   | 1                          | 0.79 | 0.0621   | 0.8032          | 0                        | 0    | ND       | ND              |
| Ts/Tv                      | 1.7                    | 0.5   |                   |                    | 6                          | 0.5  |          |                 | ND                       | ND   |          |                 |
| Deletions                  | 0                      |       |                   |                    | 0                          |      |          |                 | 0                        |      |          |                 |
| Insertions                 | 0                      |       |                   |                    | 1                          |      |          |                 | 0                        |      |          |                 |
| Recombination events       | 0                      |       |                   |                    | 1                          |      |          |                 | 0                        |      |          |                 |

| DNA-U1<br>Genome     | A: FBNSV-[ET:Hol;1997] |      |          |                 | B: FBNSV-[ET:Hol;JKI-2000] |       |          |                 | C: FBNSV-[ET:Hol;ISV-T1] |      |          |                 |
|----------------------|------------------------|------|----------|-----------------|----------------------------|-------|----------|-----------------|--------------------------|------|----------|-----------------|
|                      | Obs.                   | Exp. | $\chi^2$ | <i>p</i> -value | Obs.                       | Exp.  | $\chi^2$ | <i>p</i> -value | Obs.                     | Exp. | $\chi^2$ | <i>p</i> -value |
| Transitions (Ts)     | 12                     | 5    | 14.7     | 0.0001          | 12                         | 7.67  | 3.6739   | 0.0553          | 1                        | 0.33 | 2        | 0.1573          |
| A → G                | 2                      | 1.43 | 0.2496   | 0.6174          | 2                          | 2.19  | 0.0173   | 0.8953          | 0                        | 0.10 | 0.1054   | 0.7455          |
| G → A                | 2                      | 1.01 | 1.0558   | 0.3042          | 3                          | 1.54  | 1.4850   | 0.2230          | 1                        | 0.07 | 14.0150  | 0.0002          |
| C → T                | 4                      | 0.80 | 13.4725  | 0.0002          | 0                          | 1.23  | 1.2975   | 0.2547          | 0                        | 0.05 | 0.0564   | 0.8123          |
| T → C                | 4                      | 1.76 | 3.2232   | 0.0726          | 7                          | 2.71  | 7.6741   | 0.0056          | 0                        | 0.12 | 0.1338   | 0.7145          |
| Transversions (Tv)   | 3                      | 10   | 14.7     | 0.0001          | 11                         | 15.33 | 3.6739   | 0.0553          | 0                        | 0.67 | 2        | 0.1573          |
| A → C                | 0                      | 1.43 | 1.5825   | 0.2084          | 0                          | 2.19  | 2.4144   | 0.1202          | 0                        | 0.10 | 0.1054   | 0.7455          |
| C → A                | 1                      | 0.80 | 0.0516   | 0.8202          | 1                          | 1.23  | 0.0448   | 0.8324          | 0                        | 0.05 | 0.0564   | 0.8123          |
| A → T                | 0                      | 1.43 | 1.5825   | 0.2084          | 0                          | 2.19  | 2.4144   | 0.1202          | 0                        | 0.10 | 0.1054   | 0.7455          |
| T → A                | 1                      | 1.76 | 0.3730   | 0.5414          | 6                          | 2.71  | 4.5108   | 0.0337          | 0                        | 0.12 | 0.1338   | 0.7145          |
| C → G                | 0                      | 0.80 | 0.8473   | 0.3573          | 1                          | 1.23  | 0.0448   | 0.8324          | 0                        | 0.05 | 0.0564   | 0.8123          |
| G → C                | 0                      | 1.01 | 1.0772   | 0.2993          | 0                          | 1.54  | 1.6499   | 0.1990          | 0                        | 0.07 | 0.0714   | 0.7894          |
| G → T                | 1                      | 1.01 | 2.67E-05 | 0.9959          | 2                          | 1.54  | 0.1477   | 0.7008          | 0                        | 0.07 | 0.0714   | 0.7894          |
| T → G                | 0                      | 1.76 | 1.9959   | 0.1577          | 1                          | 2.71  | 1.2273   | 0.2679          | 0                        | 0.12 | 0.1338   | 0.7145          |
| Ts/Tv                | 4                      | 0.5  |          |                 | 1.1                        | 0.5   |          |                 | ND                       | 0.5  |          |                 |
| Deletions            | 1                      |      |          |                 | 0                          |       |          |                 | 0                        |      |          |                 |
| Insertions           | 0                      |      |          |                 | 1                          |       |          |                 | 0                        |      |          |                 |
| Recombination events | 0                      |      |          |                 | 0                          |       |          |                 | 0                        |      |          |                 |

| DNA-U1<br>Coding region | A: FBNSV-[ET:Hol;1997] |      |          |                 | B: FBNSV-[ET:Hol;JKI-2000] |      |          |                 | C: FBNSV-[ET:Hol;ISV-T1] |      |          |                 |
|-------------------------|------------------------|------|----------|-----------------|----------------------------|------|----------|-----------------|--------------------------|------|----------|-----------------|
|                         | Obs.                   | Exp. | $\chi^2$ | <i>p</i> -value | Obs.                       | Exp. | $\chi^2$ | <i>p</i> -value | Obs.                     | Exp. | $\chi^2$ | <i>p</i> -value |
| Transitions (Ts)        | 5                      | 2.33 | 4.5719   | 0.0325          | 5                          | 3.67 | 0.7273   | 0.3937          | 0                        | 0    | ND       | ND              |
| A → G                   | 0                      | 0.74 | 0.8252   | 0.3637          | 1                          | 1.16 | 0.0246   | 0.8753          | 0                        | 0    | ND       | ND              |
| G → A                   | 0                      | 0.48 | 0.5103   | 0.4750          | 1                          | 0.74 | 0.0983   | 0.7539          | 0                        | 0    | ND       | ND              |
| C → T                   | 2                      | 0.26 | 11.9484  | 0.0005          | 0                          | 0.41 | 0.4287   | 0.5126          | 0                        | 0    | ND       | ND              |
| T → C                   | 3                      | 0.86 | 6.1055   | 0.0135          | 3                          | 1.35 | 2.2795   | 0.1311          | 0                        | 0    | ND       | ND              |
| Transversions (Tv)      | 2                      | 4.67 | 4.5719   | 0.0325          | 6                          | 7.33 | 0.7273   | 0.3937          | 0                        | 0    | ND       | ND              |
| A → C                   | 0                      | 0.74 | 0.8252   | 0.3637          | 0                          | 1.16 | 1.2967   | 0.2548          | 0                        | 0    | ND       | ND              |
| C → A                   | 1                      | 0.26 | 2.1526   | 0.1423          | 1                          | 0.41 | 0.8692   | 0.3512          | 0                        | 0    | ND       | ND              |
| A → T                   | 0                      | 0.74 | 0.8252   | 0.3637          | 0                          | 1.16 | 1.2967   | 0.2548          | 0                        | 0    | ND       | ND              |
| T → A                   | 0                      | 0.86 | 0.9768   | 0.3230          | 2                          | 1.35 | 0.3507   | 0.5537          | 0                        | 0    | ND       | ND              |
| C → G                   | 0                      | 0.26 | 0.2728   | 0.6015          | 0                          | 0.41 | 0.4287   | 0.5126          | 0                        | 0    | ND       | ND              |
| G → C                   | 0                      | 0.48 | 0.5103   | 0.4750          | 0                          | 0.74 | 0.7930   | 0.3732          | 0                        | 0    | ND       | ND              |
| G → T                   | 1                      | 0.48 | 0.6205   | 0.4309          | 2                          | 0.74 | 2.3027   | 0.1291          | 0                        | 0    | ND       | ND              |
| T → G                   | 0                      | 0.86 | 0.9768   | 0.3230          | 1                          | 1.35 | 0.1059   | 0.7449          | 0                        | 0    | ND       | ND              |
| Ts/Tv                   | 2.5                    | 0.5  |          |                 | 0.8                        | 0.5  |          |                 | ND                       | ND   |          |                 |
| Deletions               | 1                      |      |          |                 | 0                          |      |          |                 | 0                        |      |          |                 |
| Insertions              | 0                      |      |          |                 | 0                          |      |          |                 | 0                        |      |          |                 |
| Recombination events    | 0                      |      |          |                 | 0                          |      |          |                 | 0                        |      |          |                 |

| DNA-U1<br>Non coding region | A: FBNSV-[ET:Hol;1997] |      |          |                 | B: FBNSV-[ET:Hol;JKI-2000] |      |          |                 | C: FBNSV-[ET:Hol;ISV-T1] |      |          |                 |
|-----------------------------|------------------------|------|----------|-----------------|----------------------------|------|----------|-----------------|--------------------------|------|----------|-----------------|
|                             | Obs.                   | Exp. | $\chi^2$ | <i>p</i> -value | Obs.                       | Exp. | $\chi^2$ | <i>p</i> -value | Obs.                     | Exp. | $\chi^2$ | <i>p</i> -value |
| Transitions (Ts)            | 7                      | 2.67 | 10.5625  | 0.0012          | 7                          | 4    | 3.3750   | 0.0662          | 1                        | 0.33 | 1.9998   | 0.1573          |
| A → G                       | 2                      | 0.69 | 2.7208   | 0.0990          | 1                          | 1.03 | 0.0007   | 0.9792          | 0                        | 0.09 | 0.0942   | 0.7589          |
| G → A                       | 2                      | 0.53 | 4.3792   | 0.0364          | 2                          | 0.80 | 1.9286   | 0.1649          | 1                        | 0.07 | 14.1440  | 0.0002          |
| C → T                       | 2                      | 0.54 | 4.1710   | 0.0411          | 0                          | 0.82 | 0.8751   | 0.3496          | 0                        | 0.07 | 0.0729   | 0.7871          |
| T → C                       | 1                      | 0.90 | 0.0118   | 0.9134          | 4                          | 1.36 | 5.7862   | 0.0162          | 0                        | 0.11 | 0.1277   | 0.7208          |
| Transversions (Tv)          | 1                      | 5.33 | 10.5625  | 0.0012          | 5                          | 8    | 3.3750   | 0.0662          | 0                        | 0.67 | 1.9998   | 0.1573          |
| A → C                       | 0                      | 0.69 | 0.7553   | 0.3848          | 0                          | 1.03 | 1.1210   | 0.2897          | 0                        | 0.09 | 0.0942   | 0.7589          |
| C → A                       | 0                      | 0.54 | 0.5846   | 0.4445          | 0                          | 0.82 | 0.8751   | 0.3496          | 0                        | 0.07 | 0.0729   | 0.7871          |
| A → T                       | 0                      | 0.69 | 0.7553   | 0.3848          | 0                          | 1.03 | 1.1210   | 0.2897          | 0                        | 0.09 | 0.0942   | 0.7589          |
| T → A                       | 1                      | 0.90 | 0.0118   | 0.9134          | 4                          | 1.36 | 5.7862   | 0.0162          | 0                        | 0.11 | 0.1277   | 0.7208          |
| C → G                       | 0                      | 0.54 | 0.5846   | 0.4445          | 1                          | 0.82 | 0.0447   | 0.8325          | 0                        | 0.07 | 0.0729   | 0.7871          |
| G → C                       | 0                      | 0.53 | 0.5665   | 0.4516          | 0                          | 0.80 | 0.8571   | 0.3545          | 0                        | 0.07 | 0.0707   | 0.7903          |
| G → T                       | 0                      | 0.53 | 0.5665   | 0.4516          | 0                          | 0.80 | 0.8571   | 0.3545          | 0                        | 0.07 | 0.0707   | 0.7903          |
| T → G                       | 0                      | 0.90 | 1.0175   | 0.3131          | 0                          | 1.36 | 1.5328   | 0.2157          | 0                        | 0.11 | 0.1277   | 0.7208          |
| Ts/Tv                       | 7                      | 0.5  |          |                 | 1.4                        | 0.5  |          |                 | ND                       | 0.5  |          |                 |
| Deletions                   | 0                      |      |          |                 | 0                          |      |          |                 | 0                        |      |          |                 |
| Insertions                  | 0                      |      |          |                 | 1                          |      |          |                 | 0                        |      |          |                 |
| Recombination events        | 0                      |      |          |                 | 0                          |      |          |                 | 0                        |      |          |                 |

| DNA-U2<br>Genome     | A: FBNSV-[ET:Hol;1997] |      |                   |                    | B: FBNSV-[ET:Hol;JKI-2000] |      |          |                 | C: FBNSV-[ET:Hol;ISV-T1] |      |          |                 |
|----------------------|------------------------|------|-------------------|--------------------|----------------------------|------|----------|-----------------|--------------------------|------|----------|-----------------|
|                      | Obs.                   | Exp. | $\chi^2$          | <i>p</i> -value    | Obs.                       | Exp. | $\chi^2$ | <i>p</i> -value | Obs.                     | Exp. | $\chi^2$ | <i>p</i> -value |
| Transitions (Ts)     | 11                     | 4.67 | 12.8929           | 3.30E-04           | 9                          | 4.67 | 6.0357   | 0.0140          | 5                        | 2.33 | 4.5714   | 0.0325          |
| A → G                | 2 (+1)                 | 1.38 | 0.3130 to 2.1230  | 0.5758 to 0.1451   | 2                          | 1.37 | 0.3262   | 0.5679          | 2                        | 0.68 | 2.8144   | 0.0934          |
| G → A                | 1 (+1)                 | 0.98 | 0.0005 to 1.1477  | 0.9817 to 0.2840   | 4                          | 0.98 | 9.9771   | 0.0016          | 2                        | 0.49 | 4.9885   | 0.0255          |
| C → T                | 1 (+4)                 | 0.82 | 0.0437 to 22.7564 | 0.8344 to 1.84E-06 | 1                          | 0.83 | 0.0394   | 0.8426          | 0                        | 0.41 | 0.4384   | 0.5079          |
| T → C                | 2 (+4)                 | 1.50 | 0.1908 to 15.1951 | 0.6622 to 9.70E-05 | 2                          | 1.49 | 0.1920   | 0.6612          | 1                        | 0.75 | 0.0960   | 0.7567          |
| Transversions (Tv)   | 3                      | 9.33 | 12.8929           | 3.30E-04           | 5                          | 9.33 | 6.0357   | 0.0140          | 2                        | 4.67 | 4.5714   | 0.0325          |
| A → C                | (+1)                   | 1.38 | 1.5268 to 0.1143  | 0.2166 to 0.7353   | 1                          | 1.37 | 0.1086   | 0.7417          | 1                        | 0.68 | 0.1631   | 0.6863          |
| C → A                | (+1)                   | 0.82 | 0.8673 to 0.0437  | 0.3517 to 0.8344   | 0                          | 0.83 | 0.8767   | 0.3491          | 0                        | 0.41 | 0.4384   | 0.5079          |
| A → T                | (+1)                   | 1.38 | 1.5268 to 0.1143  | 0.2166 to 0.7353   | 1                          | 1.37 | 0.1086   | 0.7417          | 1                        | 0.68 | 0.1631   | 0.6863          |
| T → A                | (+1)                   | 1.50 | 1.6740 to 0.1836  | 0.1957 to 0.6683   | 2                          | 1.49 | 0.1920   | 0.6612          | 0                        | 0.75 | 0.8361   | 0.3605          |
| C → G                | 0                      | 0.82 | 0.8673            | 0.3517             | 0                          | 0.83 | 0.8767   | 0.3491          | 0                        | 0.41 | 0.4384   | 0.5079          |
| G → C                | 0                      | 0.98 | 1.0516            | 0.3051             | 1                          | 0.98 | 0.0004   | 0.9849          | 0                        | 0.49 | 0.5280   | 0.4675          |
| G → T                | 1                      | 0.98 | 0.0005            | 0.9817             | 0                          | 0.98 | 1.0559   | 0.3041          | 0                        | 0.49 | 0.5280   | 0.4675          |
| T → G                | 0                      | 1.50 | 1.6740            | 0.1957             | 0                          | 1.49 | 1.6722   | 0.1960          | 0                        | 0.75 | 0.8361   | 0.3605          |
| Ts/Tv                | 3.7                    | 0.5  |                   |                    | 1.8                        | 0.5  |          |                 | 2.5                      | 0.5  |          |                 |
| Deletions            | 2                      |      |                   |                    | 0                          |      |          |                 | 0                        |      |          |                 |
| Insertions           | 2                      |      |                   |                    | 1                          |      |          |                 | 0                        |      |          |                 |
| Recombination events | 0                      |      |                   |                    | 1                          |      |          |                 | 0                        |      |          |                 |

| DNA-U2<br>Coding region | A: FBNSV-[ET:Hol;1997] |      |                  |                  | B: FBNSV-[ET:Hol;JKI-2000] |      |          |                 | C: FBNSV-[ET:Hol;ISV-T1] |      |          |                 |
|-------------------------|------------------------|------|------------------|------------------|----------------------------|------|----------|-----------------|--------------------------|------|----------|-----------------|
|                         | Obs.                   | Exp. | $\chi^2$         | <i>p</i> -value  | Obs.                       | Exp. | $\chi^2$ | <i>p</i> -value | Obs.                     | Exp. | $\chi^2$ | <i>p</i> -value |
| Transitions (Ts)        | 3                      | 2    | 0.7501           | 0.3865           | 3                          | 1.67 | 1.6002   | 0.2059          | 2                        | 1.33 | 0.5001   | 0.4795          |
| A → G                   | 0                      | 0.61 | 0.6742           | 0.4116           | 1                          | 0.51 | 0.5396   | 0.4626          | 1                        | 0.40 | 0.9779   | 0.3227          |
| G → A                   | 0                      | 0.41 | 0.4439           | 0.5053           | 1                          | 0.34 | 1.3407   | 0.2469          | 1                        | 0.28 | 2.0465   | 0.1526          |
| C → T                   | (+2)                   | 0.31 | 0.3314 to 9.5525 | 0.5648 to 0.0020 | 0                          | 0.26 | 0.2762   | 0.5992          | 0                        | 0.21 | 0.2209   | 0.6383          |
| T → C                   | 1 (+2)                 | 0.67 | 0.1875 to 9.1884 | 0.6650 to 0.0024 | 1                          | 0.56 | 0.4000   | 0.5271          | 0                        | 0.44 | 0.5001   | 0.4795          |
| Transversions (Tv)      | 3                      | 4    | 0.7501           | 0.3865           | 2                          | 3.33 | 1.6002   | 0.2059          | 2                        | 2.67 | 0.5001   | 0.4795          |
| A → C                   | (+1)                   | 0.61 | 0.6742 to 0.2849 | 0.4116 to 0.5935 | 1                          | 0.51 | 0.5396   | 0.4626          | 1                        | 0.40 | 0.9779   | 0.3227          |
| C → A                   | (+1)                   | 0.31 | 0.3314 to 1.5813 | 0.5648 to 0.2086 | 0                          | 0.26 | 0.2762   | 0.5992          | 0                        | 0.21 | 0.2209   | 0.6383          |
| A → T                   | (+1)                   | 0.61 | 0.6742 to 0.2849 | 0.4116 to 0.5935 | 1                          | 0.51 | 0.5396   | 0.4626          | 1                        | 0.40 | 0.9779   | 0.3227          |
| T → A                   | (+1)                   | 0.67 | 0.7501 to 0.1875 | 0.3865 to 0.6650 | 0                          | 0.56 | 0.6251   | 0.4292          | 0                        | 0.44 | 0.5001   | 0.4795          |
| C → G                   | 0                      | 0.31 | 0.3314           | 0.5648           | 0                          | 0.26 | 0.2762   | 0.5992          | 0                        | 0.21 | 0.2209   | 0.6383          |
| G → C                   | 0                      | 0.41 | 0.4439           | 0.5053           | 0                          | 0.34 | 0.3699   | 0.5431          | 0                        | 0.28 | 0.2959   | 0.5865          |
| G → T                   | 1                      | 0.41 | 0.8948           | 0.3442           | 0                          | 0.34 | 0.3699   | 0.5431          | 0                        | 0.28 | 0.2959   | 0.5865          |
| T → G                   | 0                      | 0.67 | 0.7501           | 0.3865           | 0                          | 0.56 | 0.6251   | 0.4292          | 0                        | 0.44 | 0.5001   | 0.4795          |
| Ts/Tv                   | 1                      | 0.5  |                  |                  | 1.5                        | 0.5  |          |                 | 1                        | 0.5  |          |                 |
| Deletions               | 0                      |      |                  |                  | 0                          |      |          |                 | 0                        |      |          |                 |
| Insertions              | 0                      |      |                  |                  | 0                          |      |          |                 | 0                        |      |          |                 |
| Recombination events    | 0                      |      |                  |                  | 0                          |      |          |                 | 0                        |      |          |                 |

| DNA-U2<br>Non coding region | A: FBNSV-[ET:Hol;1997] |      |                   |                  | B: FBNSV-[ET:Hol;JKI-2000] |      |          |                 | C: FBNSV-[ET:Hol;ISV-T1] |      |          |                 |
|-----------------------------|------------------------|------|-------------------|------------------|----------------------------|------|----------|-----------------|--------------------------|------|----------|-----------------|
|                             | Obs.                   | Exp. | $\chi^2$          | <i>p</i> -value  | Obs.                       | Exp. | $\chi^2$ | <i>p</i> -value | Obs.                     | Exp. | $\chi^2$ | <i>p</i> -value |
| Transitions (Ts)            | 8                      | 2.67 | 16                | 6.33E-05         | 6                          | 3    | 4.5      | 0.0339          | 3                        | 1    | 6        | 0.0143          |
| A → G                       | 2 (+1)                 | 0.77 | 2.1492 to 7.0857  | 0.1426 to 0.0078 | 1                          | 0.86 | 0.0253   | 0.8737          | 1                        | 0.29 | 1.9633   | 0.1612          |
| G → A                       | 1 (+1)                 | 0.56 | 0.3638 to 3.9399  | 0.5464 to 0.0472 | 3                          | 0.64 | 9.4161   | 0.0022          | 1                        | 0.21 | 3.1387   | 0.0765          |
| C → T                       | 1 (+2)                 | 0.49 | 0.5503 to 13.5250 | 0.4582 to 0.0002 | 1                          | 0.57 | 0.3569   | 0.5502          | 0                        | 0.19 | 0.2010   | 0.6539          |
| T → C                       | 1 (+2)                 | 0.83 | 0.0367 to 6.2751  | 0.8481 to 0.0122 | 1                          | 0.94 | 0.0047   | 0.9454          | 1                        | 0.31 | 1.6893   | 0.1937          |
| Transversions (Tv)          | 0                      | 5.33 | 16                | 6.33E-05         | 3                          | 6    | 4.5      | 0.0339          | 0                        | 2    | 6        | 0.0143          |
| A → C                       | 0                      | 0.77 | 0.8571            | 0.3546           | 0                          | 0.86 | 0.9506   | 0.3296          | 0                        | 0.29 | 0.3169   | 0.5735          |
| C → A                       | 0                      | 0.49 | 0.5273            | 0.4678           | 0                          | 0.57 | 0.6031   | 0.4374          | 0                        | 0.19 | 0.2010   | 0.6539          |
| A → T                       | 0                      | 0.77 | 0.8571            | 0.3546           | 0                          | 0.86 | 0.9506   | 0.3296          | 0                        | 0.29 | 0.3169   | 0.5735          |
| T → A                       | 0                      | 0.83 | 0.9316            | 0.3345           | 2                          | 0.94 | 1.3453   | 0.2461          | 0                        | 0.31 | 0.3487   | 0.5548          |
| C → G                       | 0                      | 0.49 | 0.5273            | 0.4678           | 0                          | 0.57 | 0.6031   | 0.4374          | 0                        | 0.19 | 0.2010   | 0.6539          |
| G → C                       | 0                      | 0.56 | 0.6062            | 0.4362           | 1                          | 0.64 | 0.2214   | 0.6380          | 0                        | 0.21 | 0.2288   | 0.6324          |
| G → T                       | 0                      | 0.56 | 0.6062            | 0.4362           | 0                          | 0.64 | 0.6864   | 0.4074          | 0                        | 0.21 | 0.2288   | 0.6324          |
| T → G                       | 0                      | 0.83 | 0.9316            | 0.3345           | 0                          | 0.94 | 1.0461   | 0.3064          | 0                        | 0.31 | 0.3487   | 0.5548          |
| Ts/Tv                       | ND                     | 0.5  |                   |                  | 2                          | 0.5  |          |                 | ND                       | 0.5  |          |                 |
| Deletions                   | 2                      |      |                   |                  | 0                          |      |          |                 | 0                        |      |          |                 |
| Insertions                  | 2                      |      |                   |                  | 1                          |      |          |                 | 0                        |      |          |                 |
| Recombination events        | 0                      |      |                   |                  | 1                          |      |          |                 | 0                        |      |          |                 |

| DNA-U4<br>Genome     | A: FBNSV-[ET:Hol;1997] |       |          |                 | B: FBNSV-[ET:Hol;JKI-2000] |      |          |                 | C: FBNSV-[ET:Hol;ISV-T1] |      |          |                 |
|----------------------|------------------------|-------|----------|-----------------|----------------------------|------|----------|-----------------|--------------------------|------|----------|-----------------|
|                      | Obs.                   | Exp.  | $\chi^2$ | <i>p</i> -value | Obs.                       | Exp. | $\chi^2$ | <i>p</i> -value | Obs.                     | Exp. | $\chi^2$ | <i>p</i> -value |
| Transitions (Ts)     | 12                     | 5.67  | 10.6176  | 0.0011          | 7                          | 6    | 0.25     | 0.6171          | 6                        | 2.67 | 6.25     | 0.0124          |
| A → G                | 3                      | 1.62  | 1.3021   | 0.2538          | 1                          | 1.71 | 0.3289   | 0.5663          | 2                        | 0.76 | 2.2239   | 0.1359          |
| G → A                | 3                      | 1.17  | 3.0993   | 0.0783          | 0                          | 1.23 | 1.3251   | 0.2497          | 0                        | 0.55 | 0.5889   | 0.4428          |
| C → T                | 3                      | 0.99  | 4.3050   | 0.0380          | 4                          | 1.06 | 8.6945   | 0.0032          | 3                        | 0.47 | 14.5716  | 0.0001          |
| T → C                | 3                      | 1.89  | 0.7356   | 0.3911          | 2                          | 1.99 | 0.0000   | 0.9963          | 1                        | 0.89 | 0.0157   | 0.9004          |
| Transversions (Tv)   | 5                      | 11.33 | 10.6176  | 0.0011          | 11                         | 12   | 0.25     | 0.6171          | 2                        | 5.33 | 6.25     | 0.0124          |
| A → C                | 0                      | 1.62  | 1.7894   | 0.1810          | 3                          | 1.71 | 1.0660   | 0.3019          | 0                        | 0.76 | 0.8421   | 0.3588          |
| C → A                | 3                      | 0.99  | 4.3050   | 0.0380          | 0                          | 1.06 | 1.1238   | 0.2891          | 0                        | 0.47 | 0.4965   | 0.4811          |
| A → T                | 0                      | 1.62  | 1.7894   | 0.1810          | 2                          | 1.71 | 0.0527   | 0.8185          | 0                        | 0.76 | 0.8421   | 0.3588          |
| T → A                | 1                      | 1.89  | 0.4704   | 0.4928          | 1                          | 1.99 | 0.5571   | 0.4554          | 1                        | 0.89 | 0.0157   | 0.9004          |
| C → G                | 0                      | 0.99  | 1.0550   | 0.3044          | 0                          | 1.06 | 1.1238   | 0.2891          | 0                        | 0.47 | 0.4965   | 0.4811          |
| G → C                | 0                      | 1.17  | 1.2514   | 0.2633          | 1                          | 1.23 | 0.0477   | 0.8271          | 0                        | 0.55 | 0.5889   | 0.4428          |
| G → T                | 1                      | 1.17  | 0.0253   | 0.8737          | 2                          | 1.23 | 0.5101   | 0.4751          | 0                        | 0.55 | 0.5889   | 0.4428          |
| T → G                | 0                      | 1.89  | 2.1248   | 0.1449          | 2                          | 1.99 | 0.0000   | 0.9963          | 1                        | 0.89 | 0.0157   | 0.9004          |
| Ts/Tv                | 2.4                    | 0.5   |          |                 | 0.6                        | 0.5  |          |                 | 3                        | 0.5  |          |                 |
| Deletions            | 1                      |       |          |                 | 0                          |      |          |                 | 0                        |      |          |                 |
| Insertions           | 0                      |       |          |                 | 0                          |      |          |                 | 1                        |      |          |                 |
| Recombination events | 1                      |       |          |                 | 1                          |      |          |                 | 2                        |      |          |                 |

| DNA-U4<br>Coding region | A: FBNSV-[ET:Hol;1997] |      |          |                 | B: FBNSV-[ET:Hol;JKI-2000] |      |          |                 | C: FBNSV-[ET:Hol;ISV-T1] |      |          |                 |
|-------------------------|------------------------|------|----------|-----------------|----------------------------|------|----------|-----------------|--------------------------|------|----------|-----------------|
|                         | Obs.                   | Exp. | $\chi^2$ | <i>p</i> -value | Obs.                       | Exp. | $\chi^2$ | <i>p</i> -value | Obs.                     | Exp. | $\chi^2$ | <i>p</i> -value |
| Transitions (Ts)        | 4                      | 2    | 3        | 0.0833          | 1                          | 1    | 0        | 1               | 0                        | 0    | ND       | ND              |
| A → G                   | 1                      | 0.63 | 0.2445   | 0.6210          | 0                          | 0.31 | 0.3513   | 0.5534          | 0                        | 0    | ND       | ND              |
| G → A                   | 0                      | 0.45 | 0.4898   | 0.4840          | 0                          | 0.23 | 0.2449   | 0.6207          | 0                        | 0    | ND       | ND              |
| C → T                   | 1                      | 0.30 | 1.7008   | 0.1922          | 1                          | 0.15 | 5.0309   | 0.0249          | 0                        | 0    | ND       | ND              |
| T → C                   | 2                      | 0.62 | 3.4613   | 0.0628          | 0                          | 0.31 | 0.3435   | 0.5578          | 0                        | 0    | ND       | ND              |
| Transversions (Tv)      | 2                      | 4    | 3        | 0.0833          | 2                          | 2    | 0        | 1               | 0                        | 0    | ND       | ND              |
| A → C                   | 0                      | 0.63 | 0.7027   | 0.4019          | 0                          | 0.31 | 0.3513   | 0.5534          | 0                        | 0    | ND       | ND              |
| C → A                   | 2                      | 0.30 | 10.0617  | 0.0015          | 0                          | 0.15 | 0.1589   | 0.6902          | 0                        | 0    | ND       | ND              |
| A → T                   | 0                      | 0.63 | 0.7027   | 0.4019          | 1                          | 0.31 | 1.6691   | 0.1964          | 0                        | 0    | ND       | ND              |
| T → A                   | 0                      | 0.62 | 0.6870   | 0.4072          | 0                          | 0.31 | 0.3435   | 0.5578          | 0                        | 0    | ND       | ND              |
| C → G                   | 0                      | 0.30 | 0.3178   | 0.5729          | 0                          | 0.15 | 0.1589   | 0.6902          | 0                        | 0    | ND       | ND              |
| G → C                   | 0                      | 0.45 | 0.4898   | 0.4840          | 0                          | 0.23 | 0.2449   | 0.6207          | 0                        | 0    | ND       | ND              |
| G → T                   | 0                      | 0.45 | 0.4898   | 0.4840          | 1                          | 0.23 | 2.8591   | 0.0909          | 0                        | 0    | ND       | ND              |
| T → G                   | 0                      | 0.62 | 0.6870   | 0.4072          | 0                          | 0.31 | 0.3435   | 0.5578          | 0                        | 0    | ND       | ND              |
| Ts/Tv                   | 2                      | 0.5  |          |                 | 0.5                        | 0.5  |          |                 | ND                       | ND   |          |                 |
| Deletions               | 0                      |      |          |                 | 0                          |      |          |                 | 0                        |      |          |                 |
| Insertions              | 0                      |      |          |                 | 0                          |      |          |                 | 0                        |      |          |                 |
| Recombination events    | 0                      |      |          |                 | 0                          |      |          |                 | 1                        |      |          |                 |

| DNA-U4<br>Non coding region | A: FBNSV-[ET:Hol;1997] |      |          |                 | B: FBNSV-[ET:Hol;JKI-2000] |      |          |                 | C: FBNSV-[ET:Hol;ISV-T1] |      |          |                 |
|-----------------------------|------------------------|------|----------|-----------------|----------------------------|------|----------|-----------------|--------------------------|------|----------|-----------------|
|                             | Obs.                   | Exp. | $\chi^2$ | <i>p</i> -value | Obs.                       | Exp. | $\chi^2$ | <i>p</i> -value | Obs.                     | Exp. | $\chi^2$ | <i>p</i> -value |
| Transitions (Ts)            | 8                      | 3.67 | 7.6826   | 0.0056          | 6                          | 5    | 0.3      | 0.5839          | 6                        | 2.67 | 6.2506   | 0.0124          |
| A → G                       | 2                      | 1.00 | 1.1083   | 0.2924          | 1                          | 1.36 | 0.1049   | 0.7461          | 2                        | 0.73 | 2.4631   | 0.1165          |
| G → A                       | 3                      | 0.72 | 7.7600   | 0.0053          | 0                          | 0.98 | 1.0476   | 0.3061          | 0                        | 0.52 | 0.5587   | 0.4548          |
| C → T                       | 2                      | 0.68 | 2.6923   | 0.1008          | 3                          | 0.94 | 4.8017   | 0.0284          | 3                        | 0.50 | 13.3995  | 0.0003          |
| T → C                       | 1                      | 1.27 | 0.0633   | 0.8014          | 2                          | 1.72 | 0.0518   | 0.8199          | 1                        | 0.92 | 0.0077   | 0.9302          |
| Transversions (Tv)          | 3                      | 7.33 | 7.6826   | 0.0056          | 9                          | 10   | 0.3      | 0.5839          | 2                        | 5.33 | 6.2506   | 0.0124          |
| A → C                       | 0                      | 1.00 | 1.0970   | 0.2949          | 3                          | 1.36 | 2.1745   | 0.1403          | 0                        | 0.73 | 0.7978   | 0.3717          |
| C → A                       | 1                      | 0.68 | 0.1545   | 0.6943          | 0                          | 0.94 | 1.0048   | 0.3162          | 0                        | 0.50 | 0.5313   | 0.4661          |
| A → T                       | 0                      | 1.00 | 1.0970   | 0.2949          | 1                          | 1.36 | 0.1049   | 0.7461          | 0                        | 0.73 | 0.7978   | 0.3717          |
| T → A                       | 1                      | 1.27 | 0.0633   | 0.8014          | 1                          | 1.72 | 0.3398   | 0.5599          | 1                        | 0.92 | 0.0077   | 0.9302          |
| C → G                       | 0                      | 0.68 | 0.7306   | 0.3927          | 0                          | 0.94 | 1.0048   | 0.3162          | 0                        | 0.50 | 0.5313   | 0.4661          |
| G → C                       | 0                      | 0.72 | 0.7682   | 0.3808          | 1                          | 0.98 | 0.0005   | 0.9826          | 0                        | 0.52 | 0.5587   | 0.4548          |
| G → T                       | 1                      | 0.72 | 0.1185   | 0.7307          | 1                          | 0.98 | 0.0005   | 0.9826          | 0                        | 0.52 | 0.5587   | 0.4548          |
| T → G                       | 0                      | 1.27 | 1.4311   | 0.2316          | 2                          | 1.72 | 0.0518   | 0.8199          | 1                        | 0.92 | 0.0077   | 0.9302          |
| Ts/Tv                       | 11                     | 0.5  |          |                 | 0.7                        | 0.5  |          |                 | 3                        | 0.5  |          |                 |
| Deletions                   | 1                      |      |          |                 | 0                          |      |          |                 | 0                        |      |          |                 |
| Insertions                  | 0                      |      |          |                 | 0                          |      |          |                 | 1                        |      |          |                 |
| Recombination events        | 1                      |      |          |                 | 1                          |      |          |                 | 1                        |      |          |                 |











|         |     |                      |                 |                                       |                     |                                                                                                                                                                                                                                                                                                                                                                                                                                                                                                                                                                                                                                                                                                                                                                                                                                                                                                                                                                                                                                                     |
|---------|-----|----------------------|-----------------|---------------------------------------|---------------------|-----------------------------------------------------------------------------------------------------------------------------------------------------------------------------------------------------------------------------------------------------------------------------------------------------------------------------------------------------------------------------------------------------------------------------------------------------------------------------------------------------------------------------------------------------------------------------------------------------------------------------------------------------------------------------------------------------------------------------------------------------------------------------------------------------------------------------------------------------------------------------------------------------------------------------------------------------------------------------------------------------------------------------------------------------|
| 809     | Ts  | C: 60.0%             |                 | C: 40.7%<br>T: 59.3%                  | T: 100%             | → in CR-M-U2: same mutation was detected in the Holetta-1997 isolate DNA-U2 at equivalent position (C812: 59.1%, T812: 36.4%)<br>→ in CR-M-U2: same mutation was detected in the JKI-2000 isolate DNA-U2 at equivalent position (C812: 96.2%, T812: 3.8%)<br>→ T809 fixed as consensus in JKI-2000 isolate<br>→ detected as variable site by direct sequencing of the JKI-2000 RCA product                                                                                                                                                                                                                                                                                                                                                                                                                                                                                                                                                                                                                                                          |
| 840     | Ts  | A: 60.0%             |                 | A: 22.2%<br>G: 77.8%                  | G: 100%             | → in CR-M-U2: same mutation was detected in the Holetta-1997 isolate DNA-U2 at equivalent position (G849: 81.8%, A846: 9.1%)<br>→ G840 fixed as consensus in JKI-2000 isolate<br>→ detected as variable site by direct sequencing of the JKI-2000 RCA product                                                                                                                                                                                                                                                                                                                                                                                                                                                                                                                                                                                                                                                                                                                                                                                       |
| 846     | Ts  | G: 30.0%<br>A: 30.0% |                 | G: 100%                               | G: 100%             | → in CR-M-U2: same mutation was detected in the Holetta-1997 isolate DNA-U2 at equivalent position (G846: 30.0%, A846: 30.0%)                                                                                                                                                                                                                                                                                                                                                                                                                                                                                                                                                                                                                                                                                                                                                                                                                                                                                                                       |
| 861     | Ts  | G: 95.0%<br>A: 5.0%  | G: 100%         | G: 100%                               | G: 100%             | → in CR-II: alters the DNA-R/S/M/N/U2/U4 type of CR-II sequence                                                                                                                                                                                                                                                                                                                                                                                                                                                                                                                                                                                                                                                                                                                                                                                                                                                                                                                                                                                     |
| 864     | Tv  | T: 100%              | T: 100%         | T: 85.2%<br>A: 14.8%                  | T: 100%             | → in CR-II: makes the sequence similar to that of DNA-C and DNA-U1 at equivalent positions (A895 on DNA-C and A878 on DNA-U1)                                                                                                                                                                                                                                                                                                                                                                                                                                                                                                                                                                                                                                                                                                                                                                                                                                                                                                                       |
| 885     | Ts  | T: 100%              | T: 100%         | T: 100%                               | T: 95.0%<br>C: 5.0% | → in CR-M-U2: same mutation was detected in the JKI-2000 isolate DNA-U2 at equivalent position (T888: 3.8%, C888: 96.2%)                                                                                                                                                                                                                                                                                                                                                                                                                                                                                                                                                                                                                                                                                                                                                                                                                                                                                                                            |
| 895-900 | Rec | AGTCTT:<br>100%      | AGTCTT:<br>100% | AGTCTT:<br>22.2%<br>TGCTCTC:<br>77.8% | TGCTCTC:<br>100%    | → in CR-M-U2: recombination event with Holetta-1997 isolate DNA-U2 898-904 (TGCTCTC: 100%)<br>→ TGCTCTC fixed as consensus in JKI-2000 isolate<br>→ in CR-M-U2: same mutations were detected in the JKI-2000 isolate DNA-U2 at equivalent position (898-904: AGTCTT: 34.6%, TGCTCTC: 65.4%)<br>→<br>→ in CR-M-U2-U4: on DNA-U4 this region is inverted when compared to DNA-M and DNA-U2. Same mutations were detected in the Holetta-1997 isolate DNA-U4 at equivalent positions (766-772: GAGAGCA: 85.0%, AAGACT: 10.0%) and in the JKI-2000 isolate DNA-U4 at equivalent positions (766-772: GAGAGCA: 71.8%, AAGACT: 23.1%)<br>→ in CR-C-M-N-U1-U2: same mutations were detected in the Holetta-1997 isolate DNA-C at equivalent position (908-913: AGTCTC: 65.0%, AGTCTT: 30.0%, TGCTCTC: 5.0%)<br>→ in CR-C-M-N-U1-U2: same mutations were detected in the JKI-2000 isolate DNA-N at equivalent position (914-918: AGTCTC: 97.5%, AGTCTT: 2.5%, TGCTCTC: 2.5%)<br>→ detected as variable site by direct sequencing of the JKI-2000 RCA product |
| 904     | Ts  | G: 100%              | G: 100%         | G: 96.3%<br>A: 3.7%                   | G: 100%             |                                                                                                                                                                                                                                                                                                                                                                                                                                                                                                                                                                                                                                                                                                                                                                                                                                                                                                                                                                                                                                                     |
| 914     | Tv  | A: 95.0%<br>C: 5.0%  | A: 100%         | C: 100%                               | C: 100%             | → in CR-M-U2: same mutations were detected in DNA-U2 at equivalent position (A918: 100% in the Holetta-1997 and C918: 100% the JKI-2000 isolate)<br>→ in CR-M-U2-U4: on DNA-U4 this region is inverted when compared to DNA-M and DNA-U2<br>→ in CR-M-U2-U4: same mutations were detected in the Holetta-1997 isolate DNA-U4 at equivalent position (G752:85.0%, T752: 15.0%)                                                                                                                                                                                                                                                                                                                                                                                                                                                                                                                                                                                                                                                                       |
| 915     | Ts  | C: 95.0%<br>T: 5.0%  | A: 100%         | T: 100%                               | T: 100%             | → in CR-M-U2: same mutations were detected in DNA-U2 at equivalent position (C919: 54.5%, T919: 45.5% in the Holetta-1997 and T919:100% the JKI-2000 isolate)<br>→ in CR-M-U2-U4: on DNA-U4 this region is inverted when compared to DNA-M and DNA-U2<br>→ in CR-M-U2-U4: same mutations were detected in the Holetta-1997 isolate DNA-U4 at equivalent position (A751:85.0%, G751: 15.0%)                                                                                                                                                                                                                                                                                                                                                                                                                                                                                                                                                                                                                                                          |

## DNA-N

| Sequence changes |          |                      |             |                      |                     | Codon changes                                                                                                                                                                 |          |                          |             |                          | Protein changes         |                          |             |                          |                         |           |
|------------------|----------|----------------------|-------------|----------------------|---------------------|-------------------------------------------------------------------------------------------------------------------------------------------------------------------------------|----------|--------------------------|-------------|--------------------------|-------------------------|--------------------------|-------------|--------------------------|-------------------------|-----------|
| position         | type     | Holetta-1997         | JKI-1998/99 | JKI-2000             | ISV-T1              | Comments                                                                                                                                                                      | position | Holetta-1997             | JKI-1998/99 | JKI-2000                 | ISV-T1                  | Holetta-1997             | JKI-1998/99 | JKI-2000                 | ISV-T1                  |           |
| 44               | Ts       | G: 95.0%<br>A: 5.0%  | G: 100%     | G: 100%              | G: 100%             |                                                                                                                                                                               |          |                          |             |                          |                         |                          |             |                          |                         |           |
| 58               | Ts       | A: 80.0%<br>G: 20.0% | A: 100%     | A: 100%              | A: 100%             | → in CR-S-N-U4: A58 make the sequence similar to that of DNA-U4 at equivalent position (A58) and G58 make the sequence similar to that of DNA-U4 at equivalent position (G58) |          |                          |             |                          |                         |                          |             |                          |                         |           |
| 86               | Tv       | T: 100%              | A: 100%     | T: 100%              | T: 100%             |                                                                                                                                                                               |          |                          |             |                          |                         |                          |             |                          |                         |           |
| 93               | Ts       | G: 80.0%<br>A: 20.0% | G: 100%     | G: 100%              | G: 100%             |                                                                                                                                                                               |          |                          |             |                          |                         |                          |             |                          |                         |           |
| 230              | Ts       | T: 100%              | T: 100%     | T: 97.5%<br>C: 2.5%  | T: 100%             |                                                                                                                                                                               |          |                          |             |                          |                         |                          |             |                          |                         |           |
| 231              | Tv       | A: 80.0%<br>C: 20.0% | A: 100%     | A: 100%              | A: 100%             |                                                                                                                                                                               |          |                          |             |                          |                         |                          |             |                          |                         |           |
| 232              | Ts       | T: 100%              | T: 100%     | T: 2.5%<br>C: 97.5%  | C: 100%             | → C232 fixed as consensus in JKI-2000 isolate                                                                                                                                 |          |                          |             |                          |                         |                          |             |                          |                         |           |
| 238              | Tv       | T: 100%              | T: 100%     | T: 90.0%<br>G: 10.0% | T: 100%             |                                                                                                                                                                               |          |                          |             |                          |                         |                          |             |                          |                         |           |
| 286              | Ts       | A: 70.0%<br>G: 30.0% | A: 100%     | A: 100%              | A: 100%             |                                                                                                                                                                               |          |                          |             |                          |                         |                          |             |                          |                         |           |
| 287              | Tv       | T: 50.0%<br>G: 50.0% | T: 100%     | T: 100%              | T: 100%             |                                                                                                                                                                               |          |                          |             |                          |                         |                          |             |                          |                         |           |
| 322              | Tv       | G: 65.0%<br>T: 35.0% | G: 100%     | G: 100%              | G: 100%             |                                                                                                                                                                               |          |                          |             |                          |                         |                          |             |                          |                         |           |
| 350              | Ts       | C: 55.0%<br>T: 45.0% | T: 100%     | T: 100%              | T: 100%             | → synonymous                                                                                                                                                                  | 5        | TTC: 55.0%<br>TTT: 45.0% | TTT: 100%   | TTT: 100%                | TTT: 100%               | Phe: 100%                | Phe: 100%   | Phe: 100%                | Phe: 100%               |           |
| 374              | Tv       | A: 100%              | A: 100%     | A: 95.0%<br>C: 5.0%  | A: 100%             | → synonymous                                                                                                                                                                  | 13       | ACA: 100%                | ACA: 100%   | ACA: 95.0%<br>ACC: 5.0%  | ACA: 100%               | Thr: 100%                | Thr: 100%   | Thr: 100%                | Thr: 100%               |           |
| 389              | Ts       | T: 55.0%<br>C: 45.0% | C: 100%     | C: 100%              | C: 100%             | → synonymous                                                                                                                                                                  | 18       | TTT: 55.0%<br>TTC: 45.0% | TTC: 100%   | TTC: 100%                | TTC: 100%               | Phe: 100%                | Phe: 100%   | Phe: 100%                | Phe: 100%               |           |
| 395              | Ts       | T: 95.0%<br>C: 5.0%  | T: 100%     | T: 100%              | T: 100%             | → synonymous                                                                                                                                                                  | 20       | TCT: 95.0%<br>TCC: 5.0%  | TCT: 100%   | TCT: 100%                | TCT: 100%               | Ser: 100%                | Ser: 100%   | Ser: 100%                | Ser: 100%               |           |
| 420              | Tv       | A: 100%              | A: 100%     | A: 20.0%<br>T: 80.0% | T: 100%             | → non synonymous<br>→ T420 fixed as consensus in JKI-2000 isolate<br>→ detected as variable site by direct sequencing of the JKI-2000 RCA product                             | 29       | ATT: 100%                | ATT: 100%   | ATT: 20.0%<br>TTT: 80.0% | TTT: 100%               | Ile: 100%                | Ile: 100%   | Ile: 20.0%<br>Phe: 80.0% | Phe: 100%               |           |
| 500              | Ts       | T: 70.0%<br>C: 30.0% | T: 100%     | T: 100%              | T: 100%             | → synonymous                                                                                                                                                                  | 55       | AAT: 70.0%<br>AAC: 30.0% | AAT: 100%   | AAT: 100%                | AAT: 100%               | Asn: 100%                | Asn: 100%   | Asn: 100%                | Asn: 100%               |           |
| 530              | Ts       | T: 100%              | T: 100%     | T: 92.5%<br>C: 7.5%  | T: 100%             | → synonymous                                                                                                                                                                  | 65       | GTT: 100%                | GTT: 100%   | GTT: 92.5%<br>GTC: 7.5%  | GTT: 100%               | Val: 100%                | Val: 100%   | Val: 100%                | Val: 100%               |           |
| 551              | Ts       | T: 70.0%<br>C: 30.0% | T: 100%     | T: 100%              | T: 100%             | → synonymous                                                                                                                                                                  | 72       | TCT: 70.0%<br>TCC: 30.0% | TCT: 100%   | TCT: 100%                | TCT: 100%               | Ser: 100%                | Ser: 100%   | Ser: 100%                | Ser: 100%               |           |
| 577              | Ts       | G: 95.0%<br>A: 5.0%  | G: 100%     | G: 100%              | G: 100%             | → non synonymous                                                                                                                                                              | 81       | CGA: 95.0%<br>CAA: 5.0%  | CGA: 100%   | CGA: 100%                | CGA: 100%               | Arg 95.0%<br>Gln: 5.0%   | Arg: 100%   | Arg: 100%                | Arg: 100%               | Arg: 100% |
| 581              | Ts       | A: 100%              | A: 100%     | A: 12.5%<br>G: 87.5% | G: 100%             | → synonymous<br>→ G581 fixed as consensus in JKI-2000 isolate<br>→ detected as variable site by direct sequencing of the JKI-2000 RCA product                                 | 82       | CCA: 100%                | CCA: 100%   | CCA: 12.5%<br>CCG: 87.5% | CCG: 100%               | Pro: 100%                | Pro: 100%   | Pro: 100%                | Pro: 100%               |           |
| 587              | Ts       | A: 70.0%<br>G: 30.0% | A: 100%     | A: 100%              | A: 100%             | → synonymous                                                                                                                                                                  | 84       | GGA: 70.0%<br>GGG: 30.0% | GGA: 100%   | GGA: 100%                | GGA: 100%               | Gly: 100%                | Gly: 100%   | Gly: 100%                | Gly: 100%               |           |
| 626              | Ts       | T: 80.0%<br>C: 20.0% | T: 100%     | T: 100%              | T: 100%             | → synonymous                                                                                                                                                                  | 97       | TAT: 80.0%<br>TAC: 20.0% | TAT: 100%   | T: 100%                  | TAT: 100%               | Tyr: 100%                | Tyr: 100%   | Tyr: 100%                | Tyr: 100%               |           |
| 628              | Tv       | G: 100%              | G: 100%     | G: 100%              | G: 97.6%<br>T: 2.4% | → non synonymous                                                                                                                                                              | 98       | GGC: 100%                | GGC: 100%   | GGC: 100%                | GGC: 97.6%<br>GTC: 2.4% | Gly: 100%                | Gly: 100%   | Gly: 100%                | Gly: 97.6%<br>Val: 2.4% |           |
| 635              | Ts       | C: 80.0%<br>T: 20.0% | C: 100%     | C: 100%              | C: 100%             | → synonymous                                                                                                                                                                  | 100      | TAC: 80.0%<br>TAT: 20.0% | TAC: 100%   | TAC: 100%                | TAC: 100%               | Tyr: 100%                | Tyr: 100%   | Tyr: 100%                | Tyr: 100%               |           |
| 646              | Ts<br>Tv | A: 55.0%<br>G: 45.0% | G: 100%     | G: 82.5%<br>T: 17.5% | G: 100%             | → non synonymous<br>→ detected as variable site by direct sequencing of the JKI-2000 RCA product                                                                              | 104      | AAG: 55.0%<br>AGG: 45.0% | AGG: 100%   | AGG: 82.5%<br>ATG: 17.5% | AGG: 100%               | Lys: 55.0%<br>Arg: 45.0% | Arg: 100%   | Arg: 82.5%<br>Met: 17.5% | Arg: 100%               |           |
| 649              | Ts       | C: 100%              | C: 100%     | C: 95.0%<br>T: 5.0%  | C: 100%             | → non synonymous                                                                                                                                                              | 105      | ACG: 100%                | ACG: 100%   | ACG: 95.0%<br>ATG: 5.0%  | ACG: 100%               | Thr: 100%                | Thr: 100%   | Thr: 95.0%<br>Met: 5.0%  | Thr: 100%               |           |
| 665              | Ts       | T: 55.0%<br>C: 45.0% | C: 100%     | C: 100%              | C: 100%             | → synonymous                                                                                                                                                                  | 110      | ATT: 55.0%<br>ATC: 45.0% | ATC: 100%   | ATC: 100%                | ATC: 100%               | Ile: 100%                | Ile: 100%   | Ile: 100%                | Ile: 100%               |           |
| 668              | Ts       | G: 65.0%<br>A: 35.0% | G: 100%     | G: 100%              | G: 100%             | → synonymous                                                                                                                                                                  | 111      | GAG: 65.0%<br>GAA: 35.0% | GAG: 100%   | GAG: 100%                | GAG: 100%               | Glu: 100%                | Glu: 100%   | Glu: 100%                | Glu: 100%               |           |
| 669              | Tv       | T: 90.0%<br>G: 10.0% | T: 100%     | T: 100%              | T: 100%             | → non synonymous                                                                                                                                                              | 112      | TCT: 90.0%<br>GCT: 10.0% | TCT: 100%   | TCT: 97.5%<br>TCC: 2.5%  | TCT: 100%               | Ser: 90.0%<br>Ala: 10.0% | Ser: 100%   | Ser: 100%                | Ser: 100%               |           |
| 671              | Ts       | T: 100%              | T: 100%     | T: 97.5%<br>C: 2.5%  | T: 100%             | → synonymous                                                                                                                                                                  |          |                          |             |                          |                         |                          |             |                          |                         |           |
| 698              | Tv       | T: 65.0%<br>C: 35.0% | T: 100%     | T: 100%              | T: 100%             | → synonymous                                                                                                                                                                  | 121      | TAT: 65.0%<br>TAC: 35.0% | TAT: 100%   | TAT: 100%                | TAT: 100%               | Tyr: 100%                | Tyr: 100%   | Tyr: 100%                | Tyr: 100%               |           |
| 745              | Ts       | G: 100%              | G: 100%     | G: 100%              | G: 97.6%<br>A: 2.4% | → non synonymous                                                                                                                                                              | 137      | AGT: 100%                | AGT: 100%   | AGT: 100%                | AGT: 97.6%<br>AAT: 2.4% | Ser: 100%                | Ser: 100%   | Ser: 100%                | Ser: 97.6%<br>Asn: 2.4% |           |
| 750              | Ts       | T: 100%              | T: 100%     | T: 97.5%<br>C: 2.5%  | T: 100%             | → non synonymous                                                                                                                                                              | 139      | TGT: 100%                | TGT: 100%   | TGT: 97.5%<br>CGT: 2.5%  | TGT: 100%               | Cys: 100%                | Cys: 100%   | Cys: 97.5%<br>Arg: 2.5%  | Cys: 100%               |           |
| 761              | Ts       | G: 55.0%<br>A: 45.0% | A: 100%     | A: 100%              | A: 100%             | → synonymous                                                                                                                                                                  | 142      | AAG: 55.0%<br>AAA: 45.0% | AAA: 100%   | AAA: 100%                | AAA: 100%               | Lys: 100%                | Lys: 100%   | Lys: 100%                | Lys: 100%               |           |
| 768              | Ts       | A: 100%              | A: 100%     | A: 100%              | A: 97.6%<br>G: 2.4% | → non synonymous                                                                                                                                                              | 145      | ATT: 100%                | ATT: 100%   | ATT: 100%                | ATT: 97.6%<br>GTT: 2.4% | Ile: 100%                | Ile: 100%   | Ile: 100%                | Ile: 97.6%<br>Val: 2.4% |           |







|     |    |                      |         |                      |         |                                                                                                                                                                                                             |
|-----|----|----------------------|---------|----------------------|---------|-------------------------------------------------------------------------------------------------------------------------------------------------------------------------------------------------------------|
| 904 | Ts | T: 100%              | T: 100% | T: 75.9%<br>C: 24.1% | T: 100% | → in CR-C-U1: same mutation was detected in Holetta-1997 isolate DNA-C at equivalent position (T913: 70.0% and C913: 30.0%)<br>→ detected as variable site by direct sequencing of the JKI-2000 RCA product |
| 916 | Ts | A: 68.4%<br>G: 31.6% | A: 100% | A: 79.3%<br>G: 20.7% | A: 100% | → in CR-C-U1: the sequence with G is similar to that of DNA-C at equivalent position (G925)<br>→ detected as variable site by direct sequencing of the JKI-2000 RCA product                                 |
| 921 | Ts | T: 100%              | T: 100% | T: 96.6%<br>C: 3.4%  | T: 100% |                                                                                                                                                                                                             |
| 930 | Tv | T: 100%              | T: 100% | T: 96.6%<br>A: 3.4%  | T: 100% |                                                                                                                                                                                                             |



|         |     |                      |                  |                                       |                     |                                                                                                                                                                                                                                                                                                                                                                                                                                                                                                                                                                                                                                                                                                                                                                                                                                                                                                                                                                                                                                                                         |
|---------|-----|----------------------|------------------|---------------------------------------|---------------------|-------------------------------------------------------------------------------------------------------------------------------------------------------------------------------------------------------------------------------------------------------------------------------------------------------------------------------------------------------------------------------------------------------------------------------------------------------------------------------------------------------------------------------------------------------------------------------------------------------------------------------------------------------------------------------------------------------------------------------------------------------------------------------------------------------------------------------------------------------------------------------------------------------------------------------------------------------------------------------------------------------------------------------------------------------------------------|
| 898-904 | Rec | TGCTCTC:<br>100%     | TGCTCTC:<br>100% | TGCTCTC:<br>65.4%<br>AGTCTT:<br>34.6% | TGCTCTC:<br>100%    | <ul style="list-style-type: none"> <li>→ in CR-M-U2: recombination event with Holetta-1997 isolate DNA-M 895-900 (AGTCTT: 100%)</li> <li>→ in CR-M-U2: same mutations were detected in the JKI-2000 isolate DNA-M at equivalent position (895-900: AGTCTT: 22.2%, TGCTCTC: 77.8%)</li> <li>→ in CR-M-U2-U4: on DNA-U4 this region is inverted when compared to DNA-M and DNA-U2. Same mutations were detected in the Holetta-1997 isolate DNA-U4 at equivalent positions (766-772: GAGAGCA: 85.0%, AAGACT: 10.0%) and in the JKI-2000 isolate DNA-U4 at equivalent positions (766-772: GAGAGCA: 71.8%, AAGACT: 23.1%)</li> <li>→ in CR-C-M-N-U1-U2: same mutations were detected in the Holetta-1997 isolate DNA-C at equivalent position (908-913: AGTCTC: 65.0%, AGTCTT: 30.0%, TGCTCTC: 5.0%)</li> <li>→ in CR-C-M-N-U1-U2: same mutations were detected in the JKI-2000 isolate DNA-N at equivalent position (914-918: AGTCTC: 97.5%, AGTCTT: 2.5%, TGCTCTC: 2.5%)</li> <li>→ detected as variable site by direct sequencing of the JKI-2000 RCA product</li> </ul> |
| 916     | Ts  | G: 100%              | G: 100%          | G: 100%                               | G: 95.0%<br>A: 5.0% |                                                                                                                                                                                                                                                                                                                                                                                                                                                                                                                                                                                                                                                                                                                                                                                                                                                                                                                                                                                                                                                                         |
| 918     | Tv  | A: 100%              | A: 100%          | C: 100%                               | C: 100%             | <ul style="list-style-type: none"> <li>→ in CR-M-U2: same mutations were detected in DNA-M at equivalent position (A914: 95.0%, C914: 5.0% in the Holetta-1997 and C914:100% the JKI-2000 isolate)</li> <li>→ in CR-M-U2-U4: on DNA-U4 this region is inverted when compared to DNA-M and DNA-U2</li> <li>→ in CR-M-U2-U4: same mutations were detected in the Holetta-1997 isolate DNA-U4 at equivalent position (G752:85.0%, T752: 15.0%)</li> </ul>                                                                                                                                                                                                                                                                                                                                                                                                                                                                                                                                                                                                                  |
| 919     | Ts  | T: 54.5%<br>C: 45.5% | T: 100%          | T: 100%                               | T: 100%             | <ul style="list-style-type: none"> <li>→ in CR-M-U2: same mutations were detected in DNA-M at equivalent position (C915: 95.0%, T915: 5.0% in the Holetta-1997 and T915:100% the JKI-2000 isolate)</li> <li>→ in CR-M-U2-U4: on DNA-U4 this region is inverted when compared to DNA-M and DNA-U2</li> <li>→ in CR-M-U2-U4: same mutations were detected in the Holetta-1997 isolate DNA-U4 at equivalent position (A751:85.0%, G751: 15.0%)</li> </ul>                                                                                                                                                                                                                                                                                                                                                                                                                                                                                                                                                                                                                  |
| 920     | Ts  | G: 100%              | G: 100%          | G: 96.2%<br>A: 3.8%                   | G: 100%             |                                                                                                                                                                                                                                                                                                                                                                                                                                                                                                                                                                                                                                                                                                                                                                                                                                                                                                                                                                                                                                                                         |
| 932     | Tv  | T: 100%              | T: 100%          | T: 92.3%<br>A: 7.7%                   | T: 100%             |                                                                                                                                                                                                                                                                                                                                                                                                                                                                                                                                                                                                                                                                                                                                                                                                                                                                                                                                                                                                                                                                         |



|         |     |                                 |                      |                                 |                     |                                                                                                                                                                                                                                                                                                                                                                                                                                                                                                                                                                                                                                                                                                                                                                                                                                                                         |
|---------|-----|---------------------------------|----------------------|---------------------------------|---------------------|-------------------------------------------------------------------------------------------------------------------------------------------------------------------------------------------------------------------------------------------------------------------------------------------------------------------------------------------------------------------------------------------------------------------------------------------------------------------------------------------------------------------------------------------------------------------------------------------------------------------------------------------------------------------------------------------------------------------------------------------------------------------------------------------------------------------------------------------------------------------------|
| 752     | Tv  | G: 85.0%<br>T: 15.0%            | G: 100%              | G: 100%                         | G: 100%             | → in CR-M-U2-U4: on DNA-U4 this region is inverted when compared to DNA-M and DNA-U2<br>→ in CR-M-U2-U4: same mutations were detected in DNA-M at equivalent position (A914: 95.0%, C914: 5.0% in the Holetta-1997 and C914:100% the JKI-2000 isolate)<br>→ in CR-M-U2: same mutations were detected in DNA-U2 at equivalent position (A918: 100% in the Holetta-1997 and C918: 100% the JKI-2000 isolate)                                                                                                                                                                                                                                                                                                                                                                                                                                                              |
| 766-772 | Rec | GAGAGCA: 85.0%<br>AAGACT: 10.0% | GAGAGCA: 100%        | GAGAGCA: 71.8%<br>AAGACT: 23.1% | GAGAGCA: 100%       | → in CR-M-U2-U4: on DNA-U4 this region is inverted when compared to DNA-M and DNA-U2<br>→ in CR-M-U2-U4: recombination event with DNA-M 895-900<br>→ in CR-M-U2-U4: same polymorphisms were detected in the JKI-2000 isolate DNA-M at equivalent position (895-900: AGTCTT: 22.2%, TGCTCTC: 77.8%)<br>→ in CR-M-U2-U4: same mutations were detected in the JKI-2000 isolate DNA-U2 at equivalent position (898-904: AGTCTT: 34.6%, TGCTCTC: 65.4%)<br>→ in CR-C-M-N-U1-U2: same mutations were detected in the Holetta-1997 isolate DNA-C at equivalent position (908-913: AGTCTC: 65.0%, AGTCTT: 30.0%, TGCTCTC: 5.0%)<br>→ in CR-C-M-N-U1-U2: same mutations were detected in the JKI-2000 isolate DNA-N at equivalent position (914-918: AGTCTC: 97.5%, AGTCTT: 2.5%, TGCTCTC: 2.5%)<br>→ detected as variable site by direct sequencing of the JKI-2000 RCA product |
| 766     | Tv  | G: 85.5%                        | G: 100%              | G: 71.8%<br>C: 2.6%             | G: 100%             |                                                                                                                                                                                                                                                                                                                                                                                                                                                                                                                                                                                                                                                                                                                                                                                                                                                                         |
| 768     | Tv  | G: 100%                         | G: 100%              | G: 97.4%<br>T: 2.6%             | G: 100%             |                                                                                                                                                                                                                                                                                                                                                                                                                                                                                                                                                                                                                                                                                                                                                                                                                                                                         |
| 770     | Ts  | G: 85.5%<br>A: 5.0%             | G: 100%              | G: 71.8%                        | G: 100%             |                                                                                                                                                                                                                                                                                                                                                                                                                                                                                                                                                                                                                                                                                                                                                                                                                                                                         |
| 806     | Ts  | T: 100%                         | T: 100%              | T: 100%                         | T: 97.7%<br>C: 2.3% |                                                                                                                                                                                                                                                                                                                                                                                                                                                                                                                                                                                                                                                                                                                                                                                                                                                                         |
| 831     | Tv  | T: 100%                         | T: 100%              | T: 89.7%<br>G: 10.3%            | T: 100%             |                                                                                                                                                                                                                                                                                                                                                                                                                                                                                                                                                                                                                                                                                                                                                                                                                                                                         |
| 832     | Ts  | C: 100%                         | C: 100%              | C: 35.9%<br>T: 64.1             | T: 100%             | → T832 fixed as consensus in JKI-2000 isolate<br>→ detected as variable site by direct sequencing of the JKI-2000 RCA product                                                                                                                                                                                                                                                                                                                                                                                                                                                                                                                                                                                                                                                                                                                                           |
| 850     | Ts  | T: 100%                         | T: 50.0%<br>C: 50.0% | C: 100%                         | C: 100%             | → C850 completely fixed as consensus in JKI-2000 isolate                                                                                                                                                                                                                                                                                                                                                                                                                                                                                                                                                                                                                                                                                                                                                                                                                |
| 858     | Ts  | A: 95.0%<br>G: 5.0%             | A: 100%              | A: 100%                         | A: 100%             |                                                                                                                                                                                                                                                                                                                                                                                                                                                                                                                                                                                                                                                                                                                                                                                                                                                                         |
| 859     | Tv  | T: 95.0%<br>A: 5.0%             | T: 100%              | T: 100%                         | T: 100%             |                                                                                                                                                                                                                                                                                                                                                                                                                                                                                                                                                                                                                                                                                                                                                                                                                                                                         |
| 903     | Ts  | A: 100%                         | A: 100%              | A: 97.4%<br>G: 2.6%             | A: 100%             |                                                                                                                                                                                                                                                                                                                                                                                                                                                                                                                                                                                                                                                                                                                                                                                                                                                                         |
| 937     | Ts  | T: 100%                         | T: 100%              | T: 7.7%<br>C: 92.3%             | C: 100%             | → in CR-S-U4: C937 make the sequence similar to that of DNA-S at equivalent position (C940)<br>→ C937 fixed as consensus in JKI-2000 isolate                                                                                                                                                                                                                                                                                                                                                                                                                                                                                                                                                                                                                                                                                                                            |
